# Supplementary material for: Green Ultrasound versus Conventional Synthesis and Characterization of Specific Task Pyridinium Ionic Liquid Hydrazones Tethering Fluorinated Counter Anions: Novel Inhibitors of Fungal Ergosterol Biosynthesis
Source: PubMed Central journal article supplement (PMC6150352; doi:10.3390/molecules22111532), 2017-11-07

# Green ultrasound versus conventional synthesis and characterization of specific task pyridinium ionic liquid hydrazones tethering fluorinated counter anions: Novel inhibitors of fungal ergosterol biosynthesis

Nadjet Rezki<sup>1,2,\*</sup>, Salsabeel A. Al-Sodies<sup>1</sup>, Sheikh Shreaz<sup>3</sup>, Rayees Ahmad Shiekh<sup>1</sup>,  
Mousslim Messali<sup>1</sup>, Mohamed R. Aouad<sup>1,2,\*</sup>

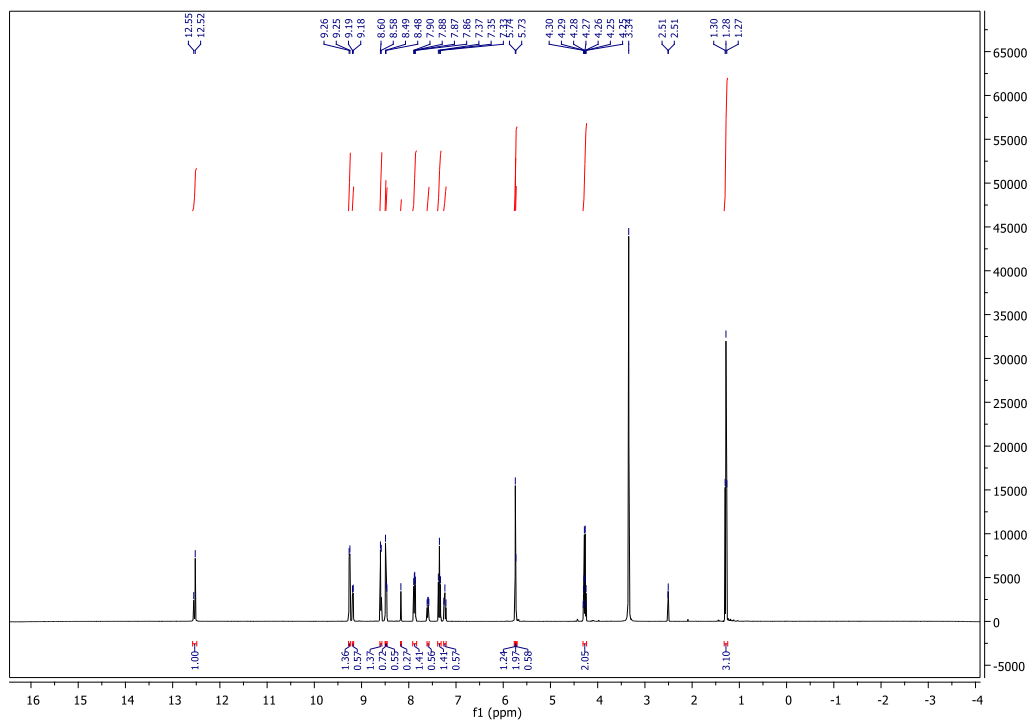

Figure S1. <sup>1</sup>H NMR of Compound 2.

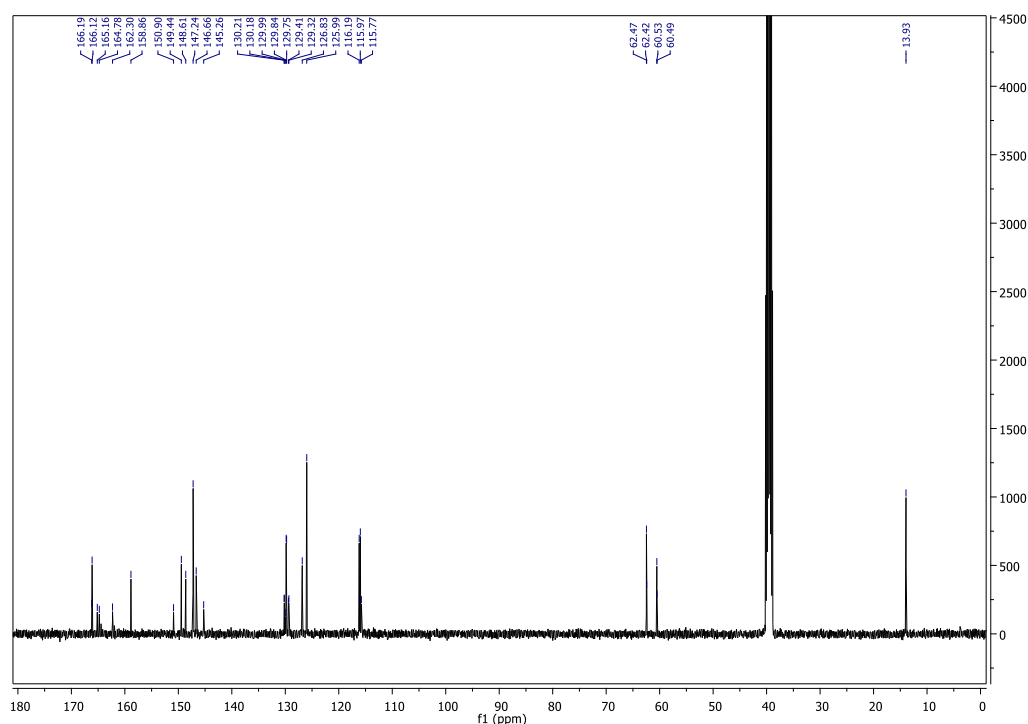

Figure S2. <sup>13</sup>C NMR of Compound 2

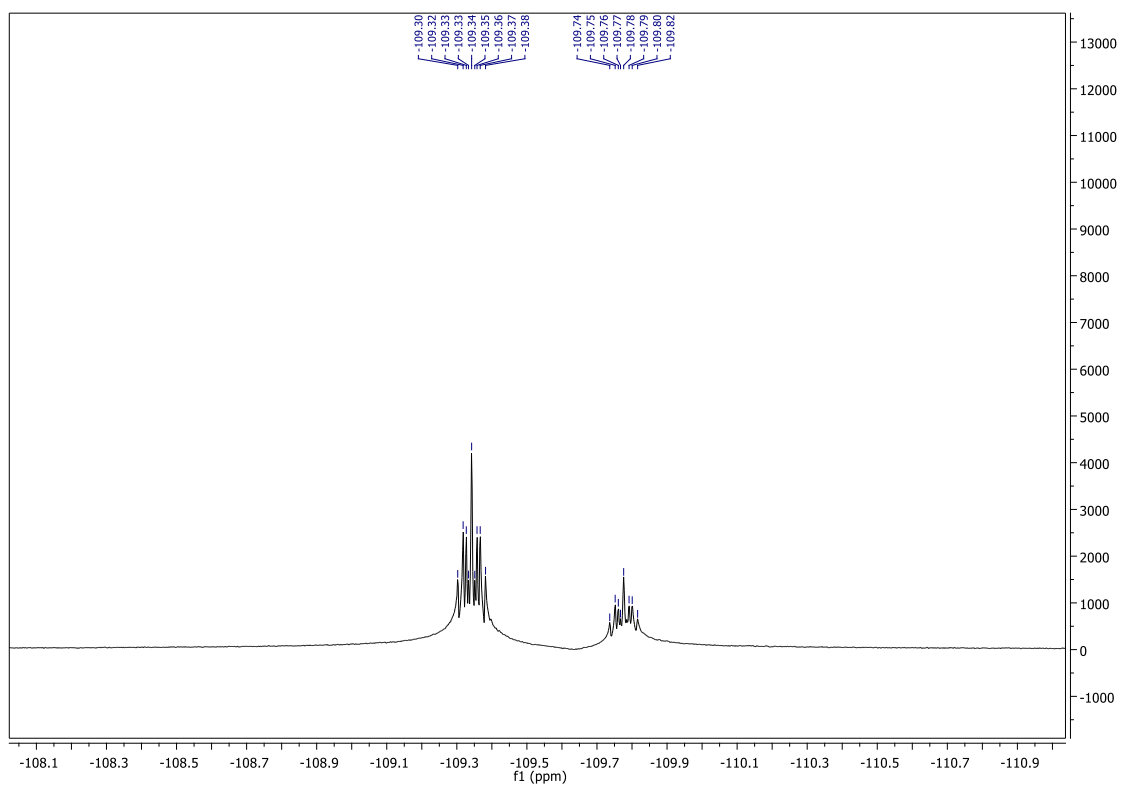

Figure S3.  $^{19}\text{F}$ NMR of Compound 2

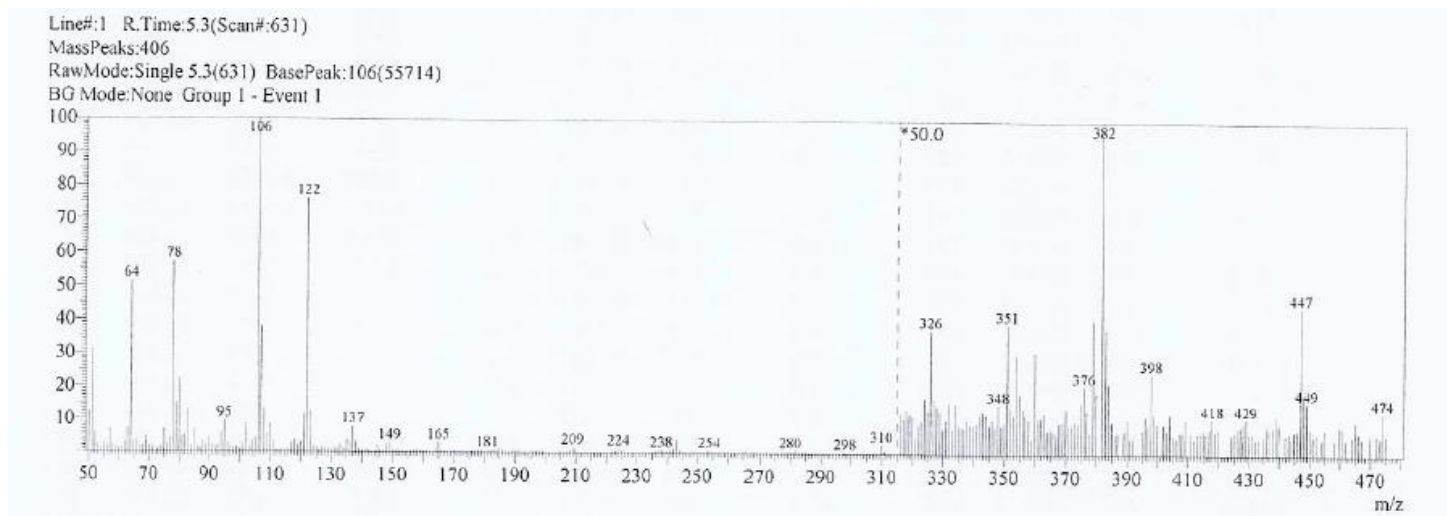

Figure S4. MS (ESI) of Compound 2

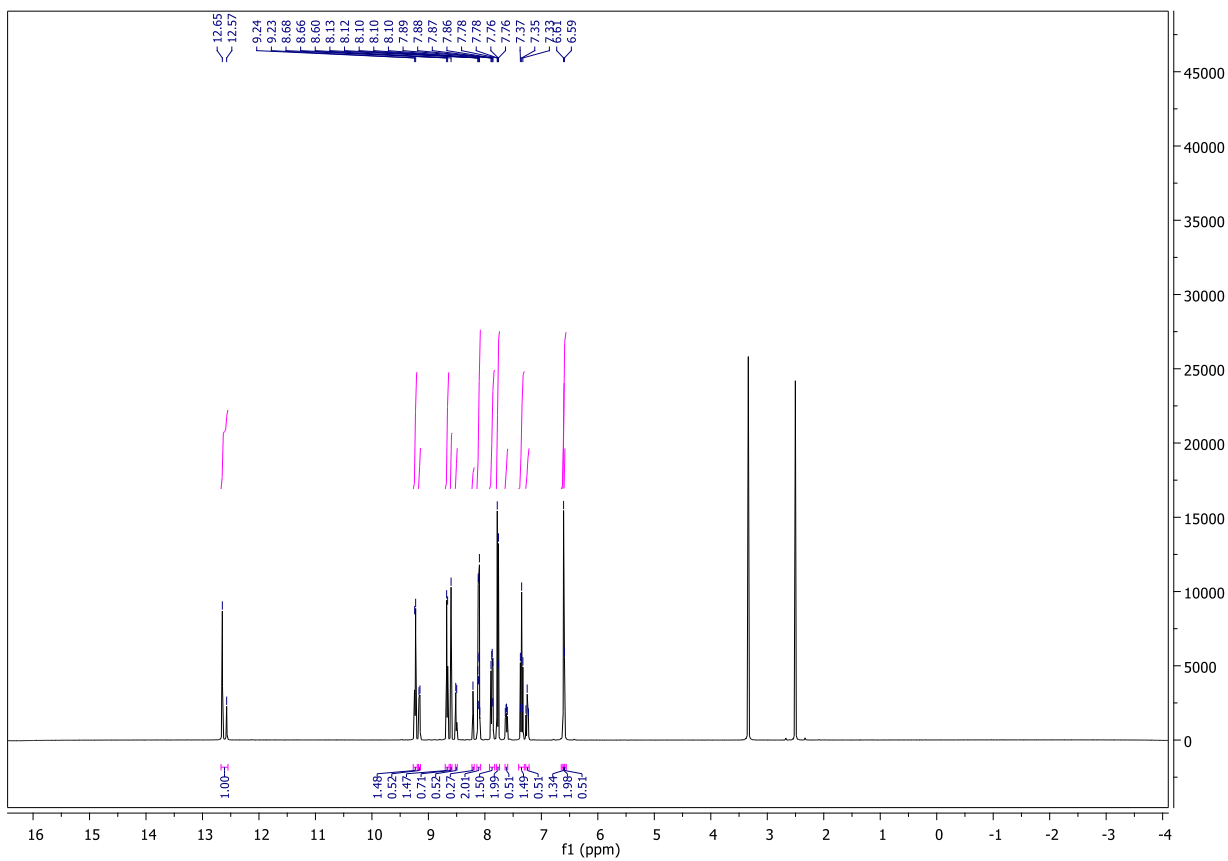

Figure S5. <sup>1</sup>H NMR of Compound 3

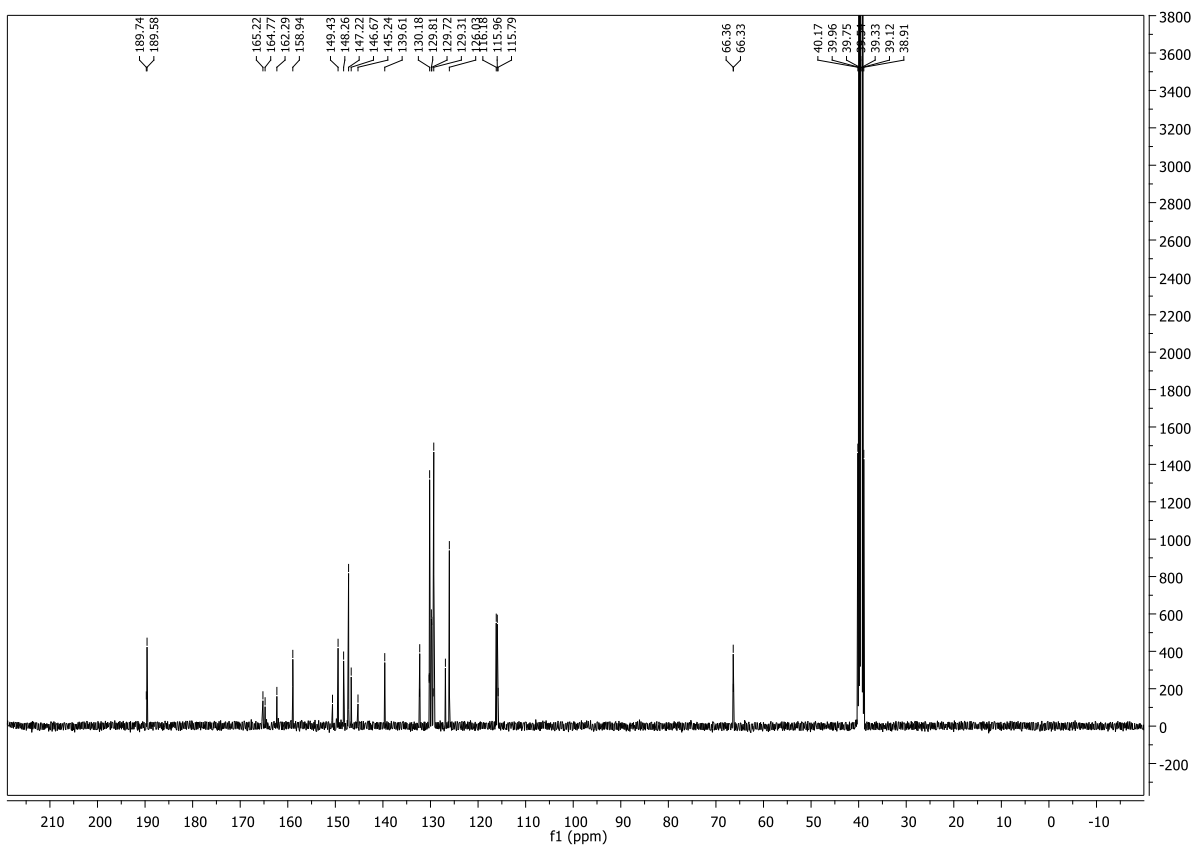

Figure S6. <sup>13</sup>C NMR of Compound 3

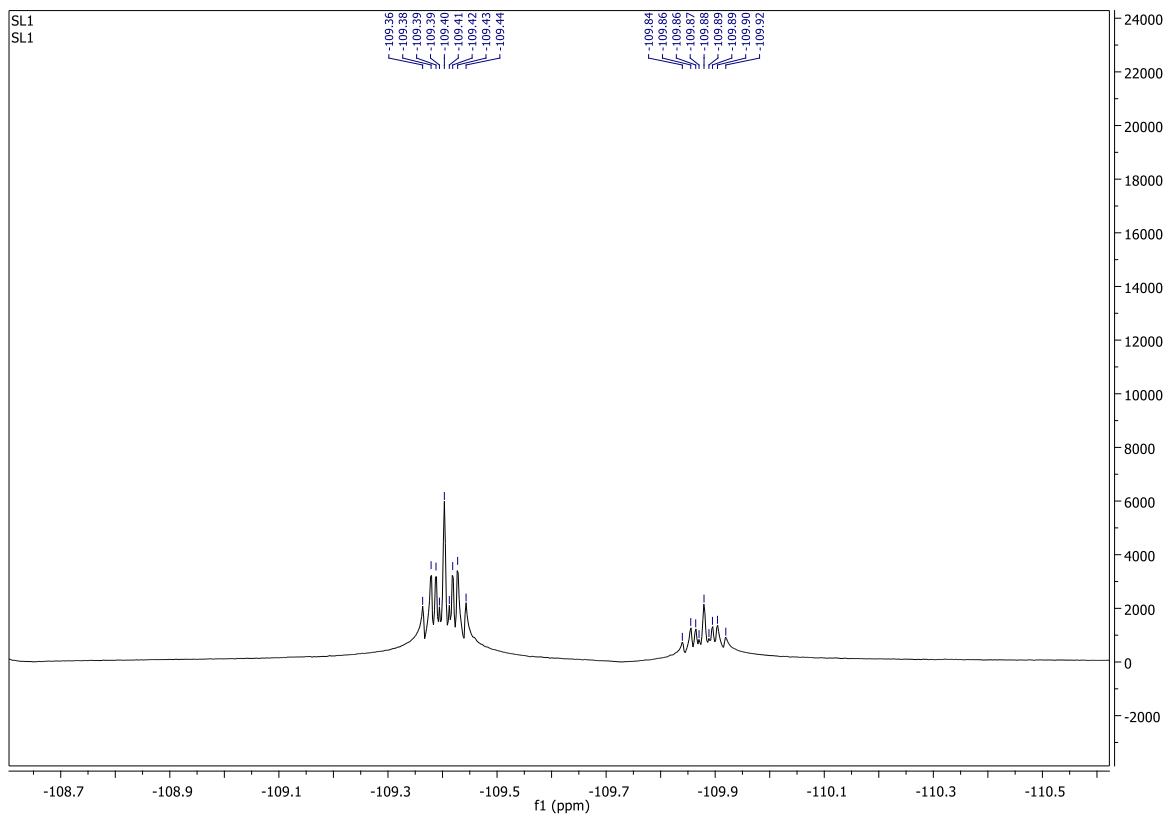

Figure S7.  $^{19}\text{F}$ NMR of Compound 3

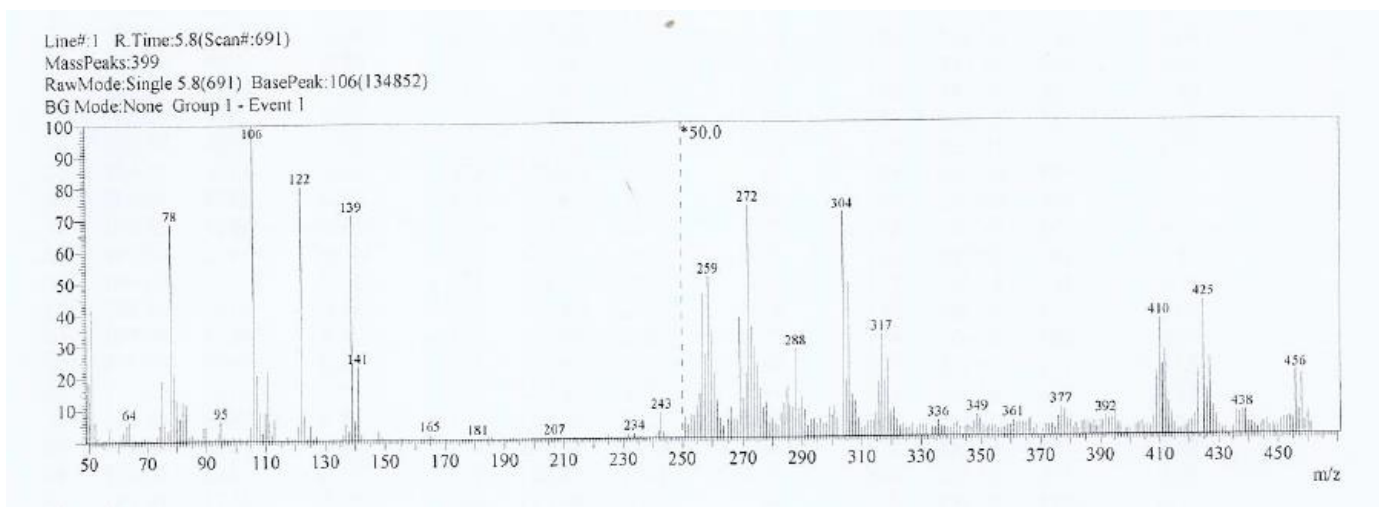

Figure S8. MS (ESI) of Compound 3

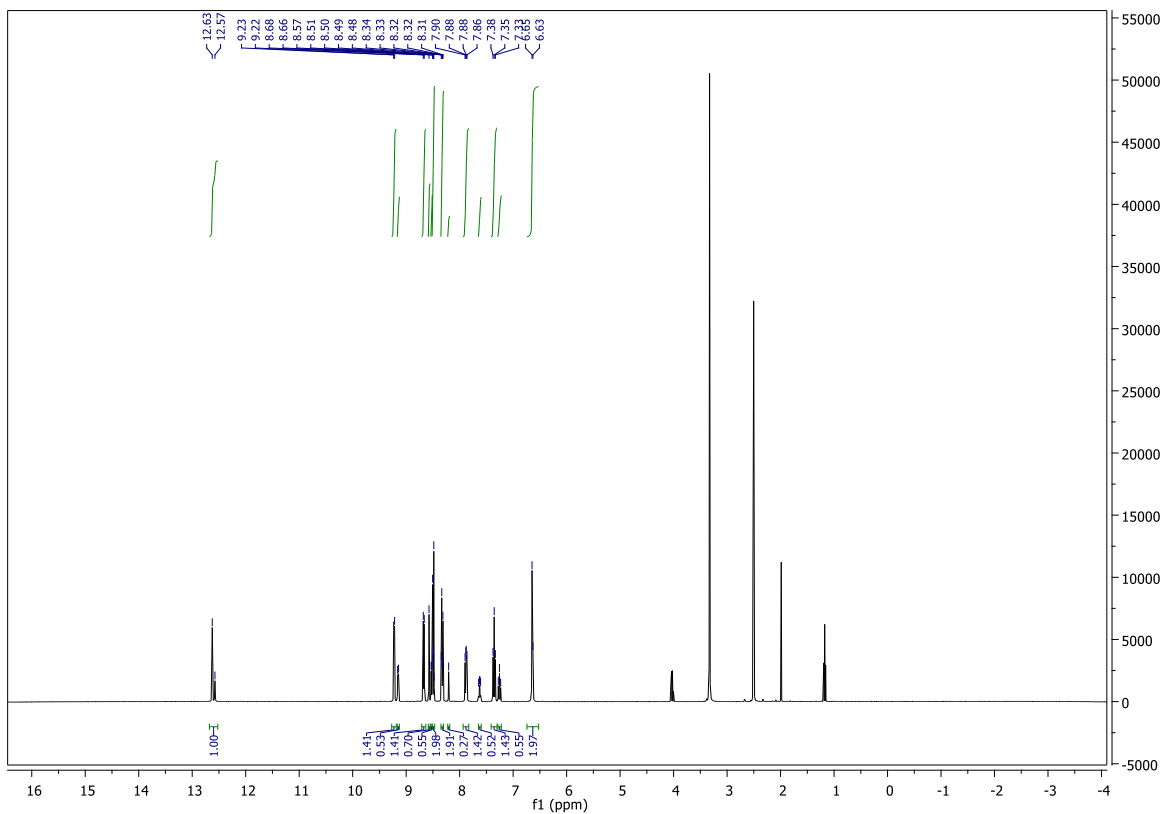

Figure S9.  $^1\text{H}$ NMR of Compound 4

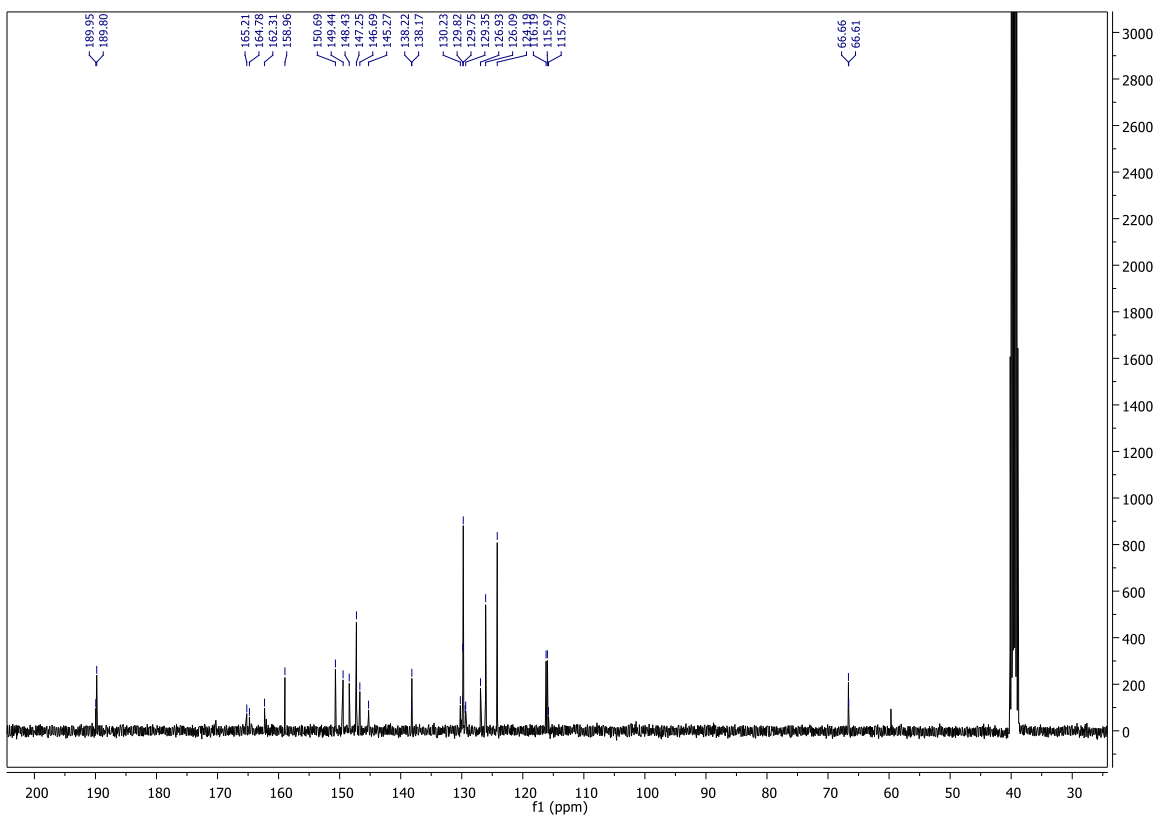

Figure S10.  $^{13}\text{C}$ NMR of Compound 4

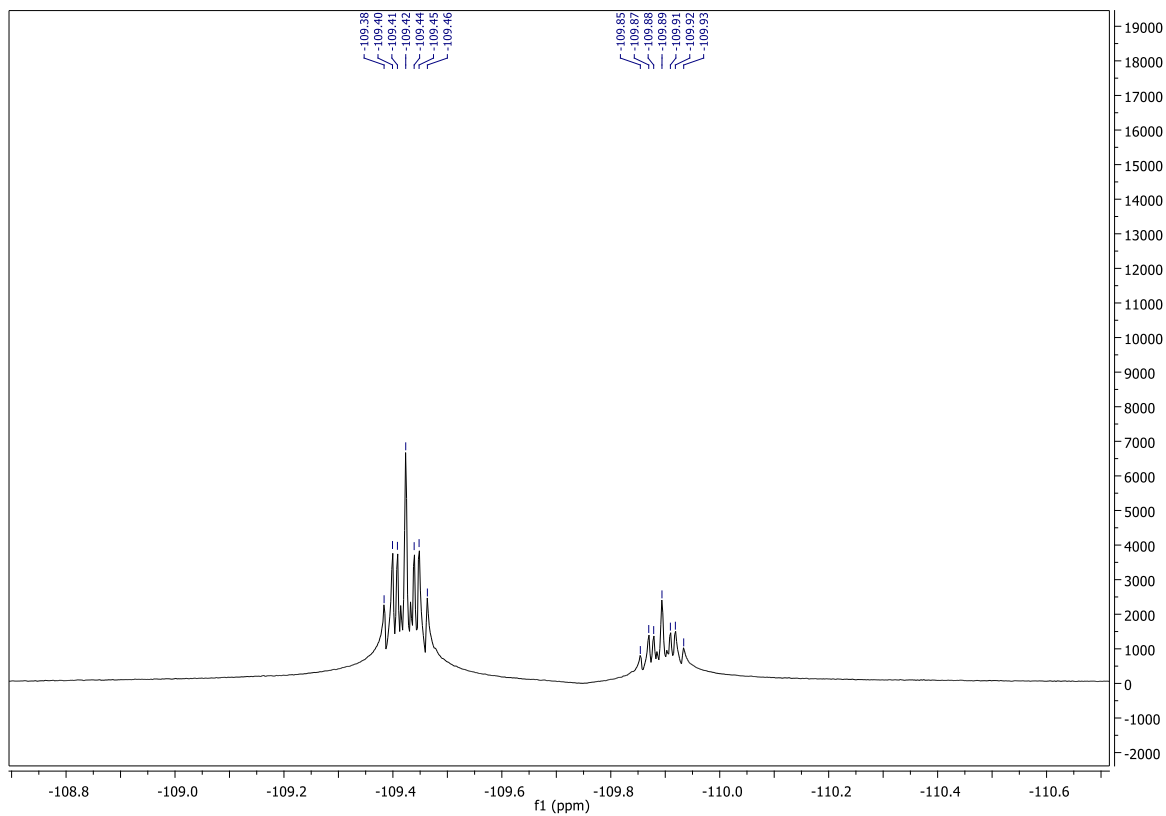

Figure S11.  $^{19}\text{F}$ NMR of Compound 4

Line#:1 R.Time:5.1(Scan#:610)

MassPeaks:376

RawMode:Single 5.1(610) BasePeak:106(191702)

BG Mode:None Group 1 - Event 1

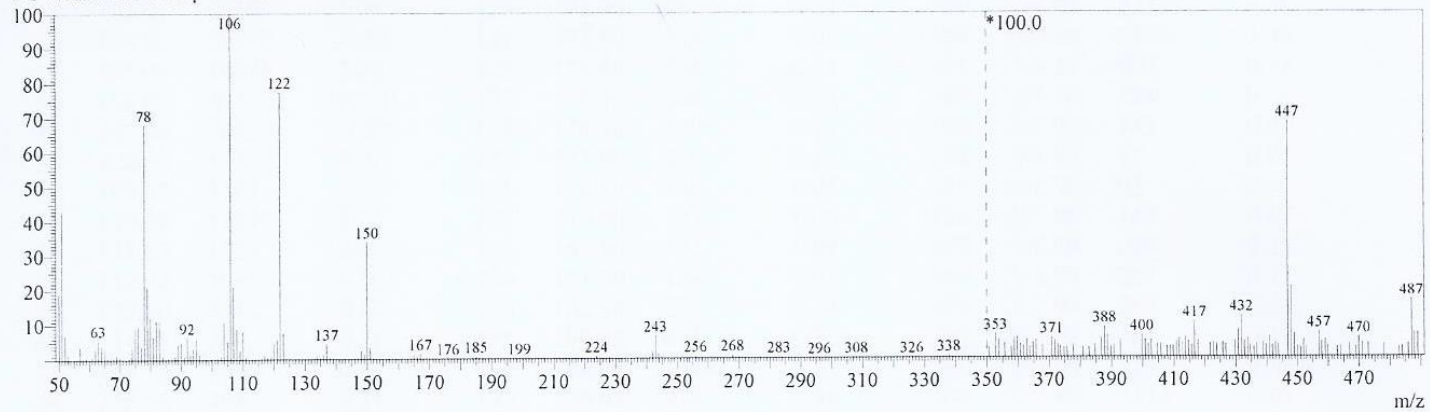

Figure S12. MS (ESI) of Compound 4

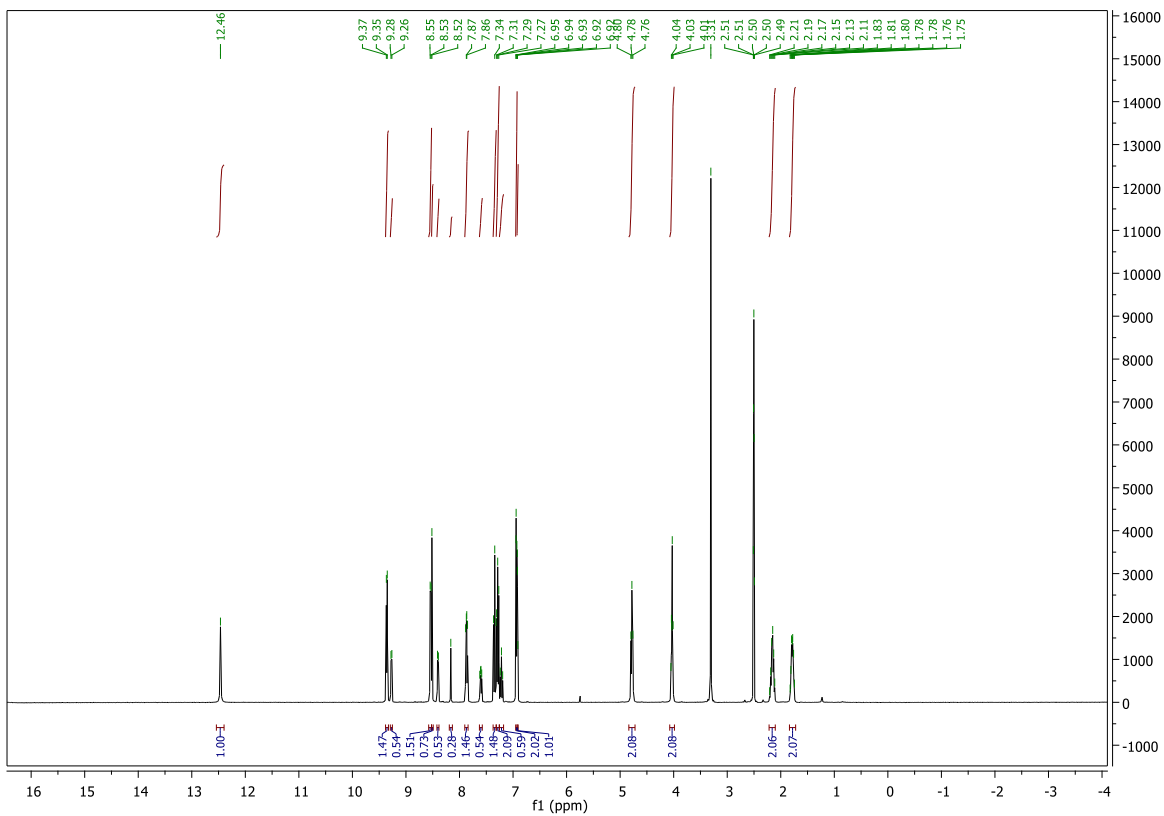

Figure S13.  $^1\text{H}$ NMR of Compound 5

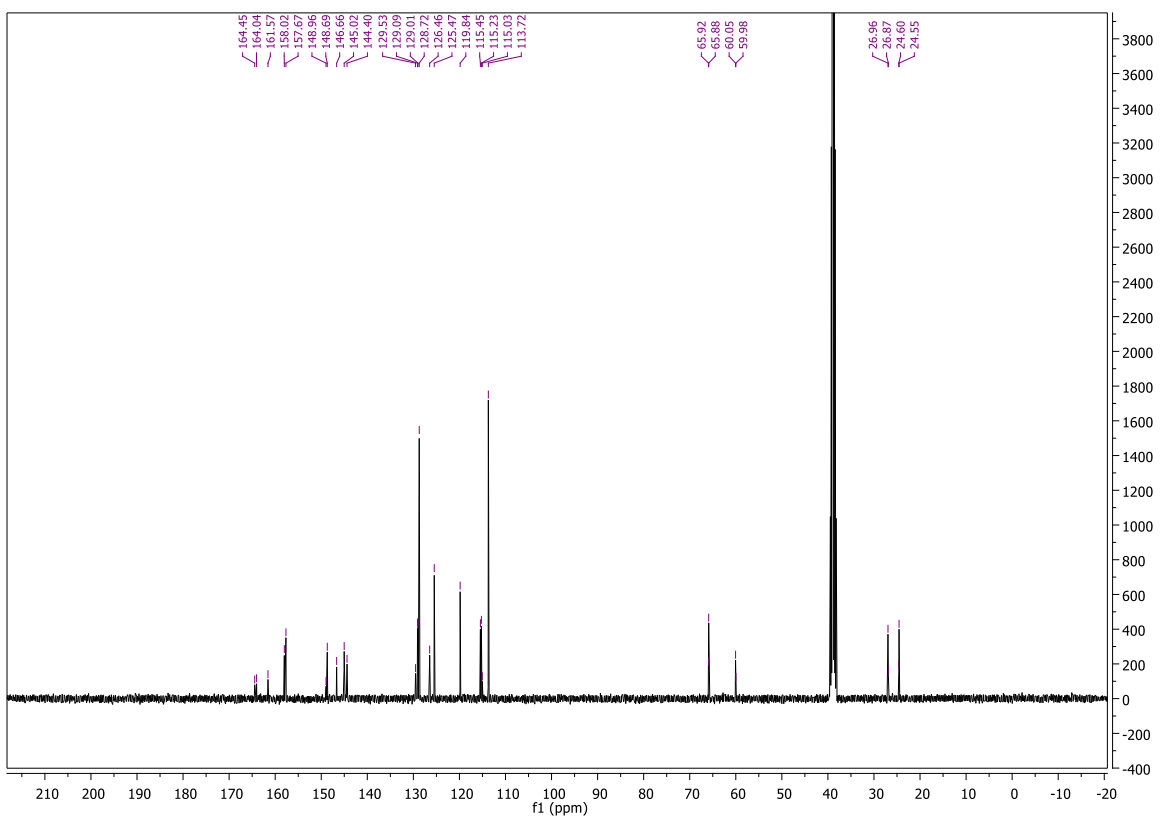

Figure S14.  $^{13}\text{C}$ NMR of Compound 5

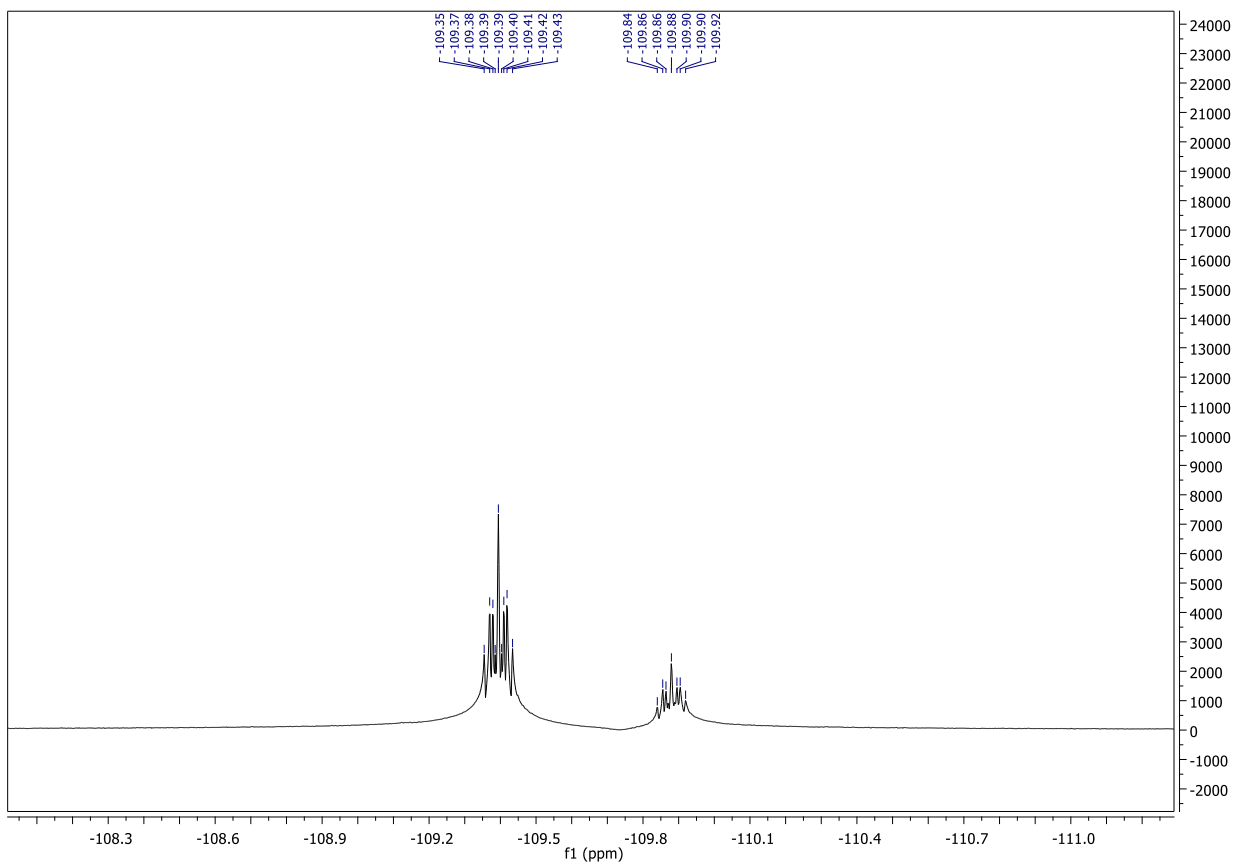

Figure S15.  $^{19}\text{F}$ NMR of Compound 5

Line#:1 R.Time:6.7(Scan#:802)

MassPeaks:408

RawMode:Single 6.7(802) BasePeak:106(44343)

BG Mode:None Group 1 - Event 1

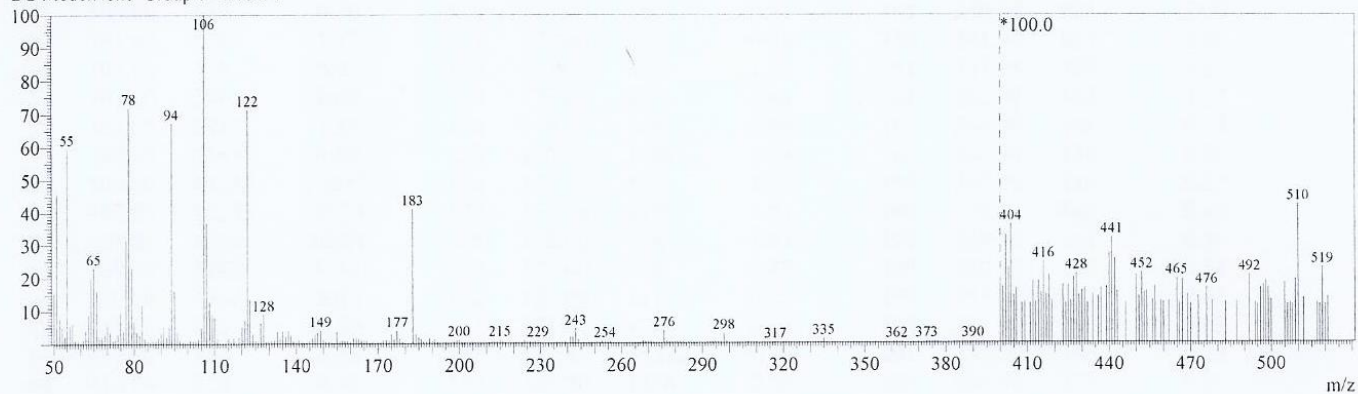

Figure S16. MS (ESI) of Compound 5



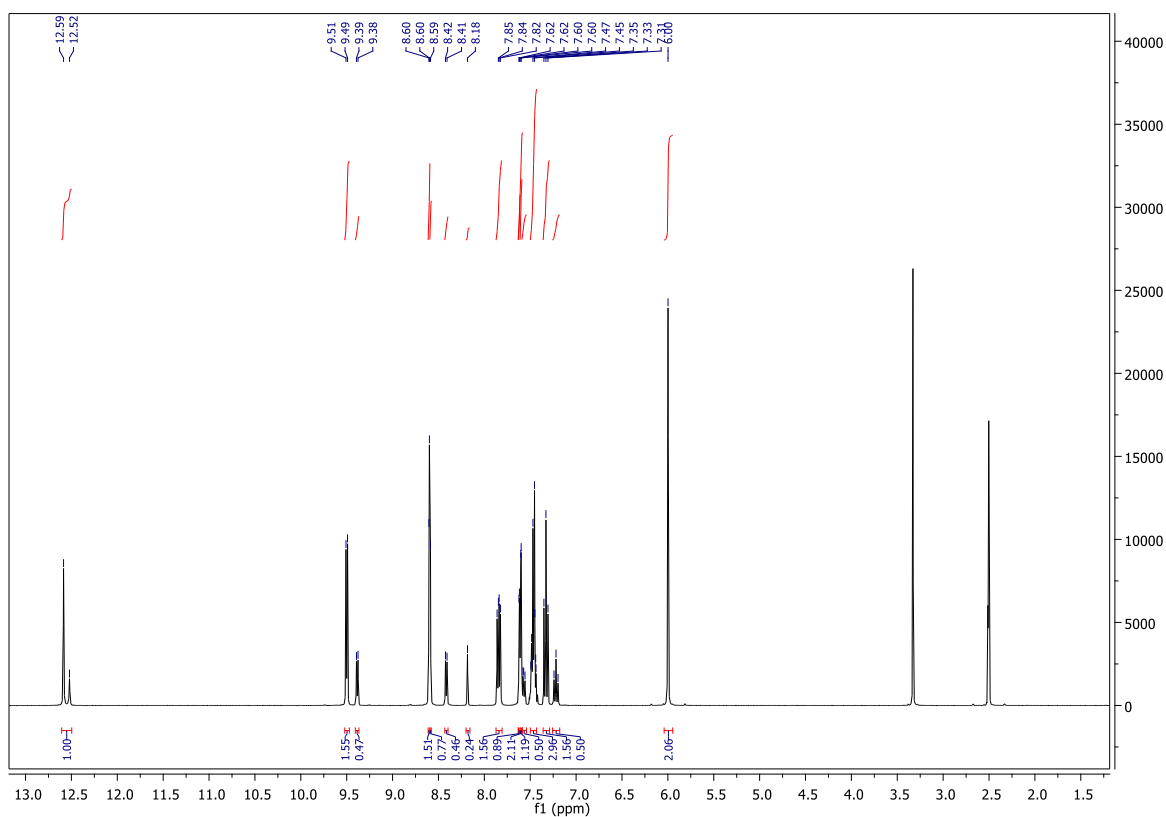

Figure S17. <sup>1</sup>H NMR of Compound 6

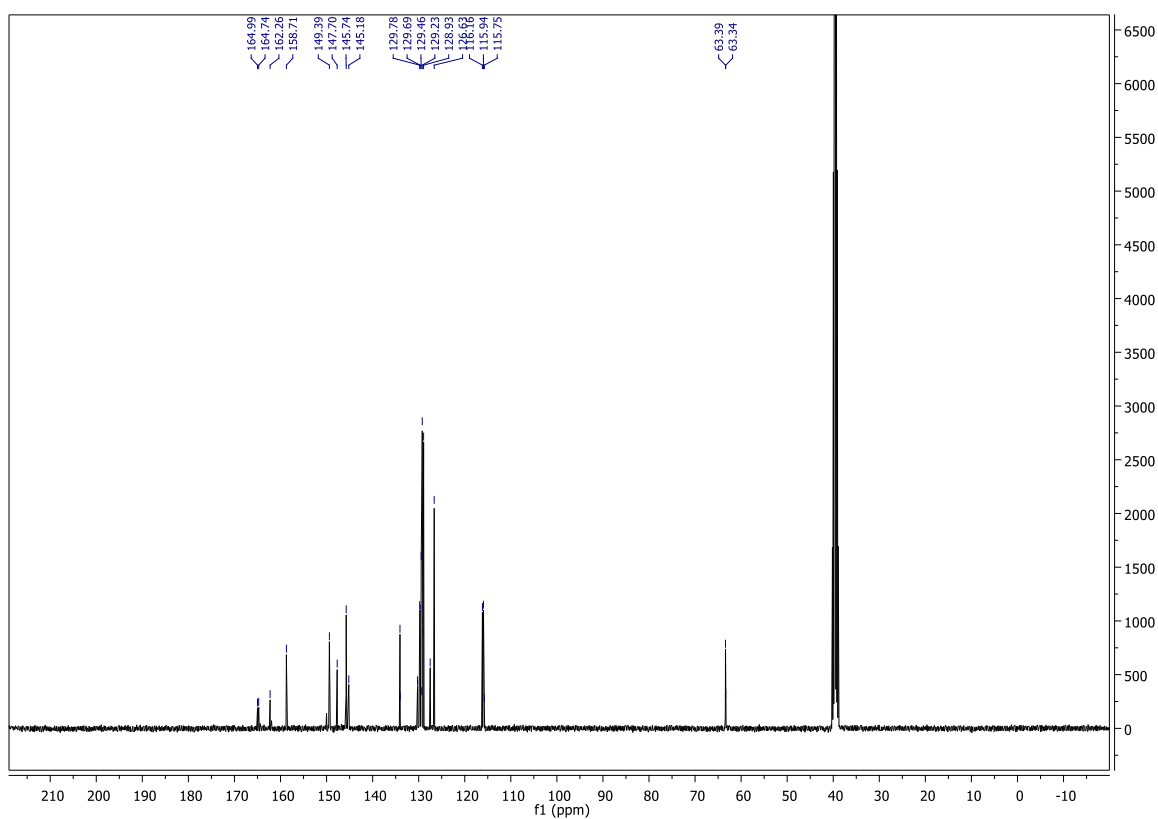

Figure S18. <sup>13</sup>C NMR of Compound 6

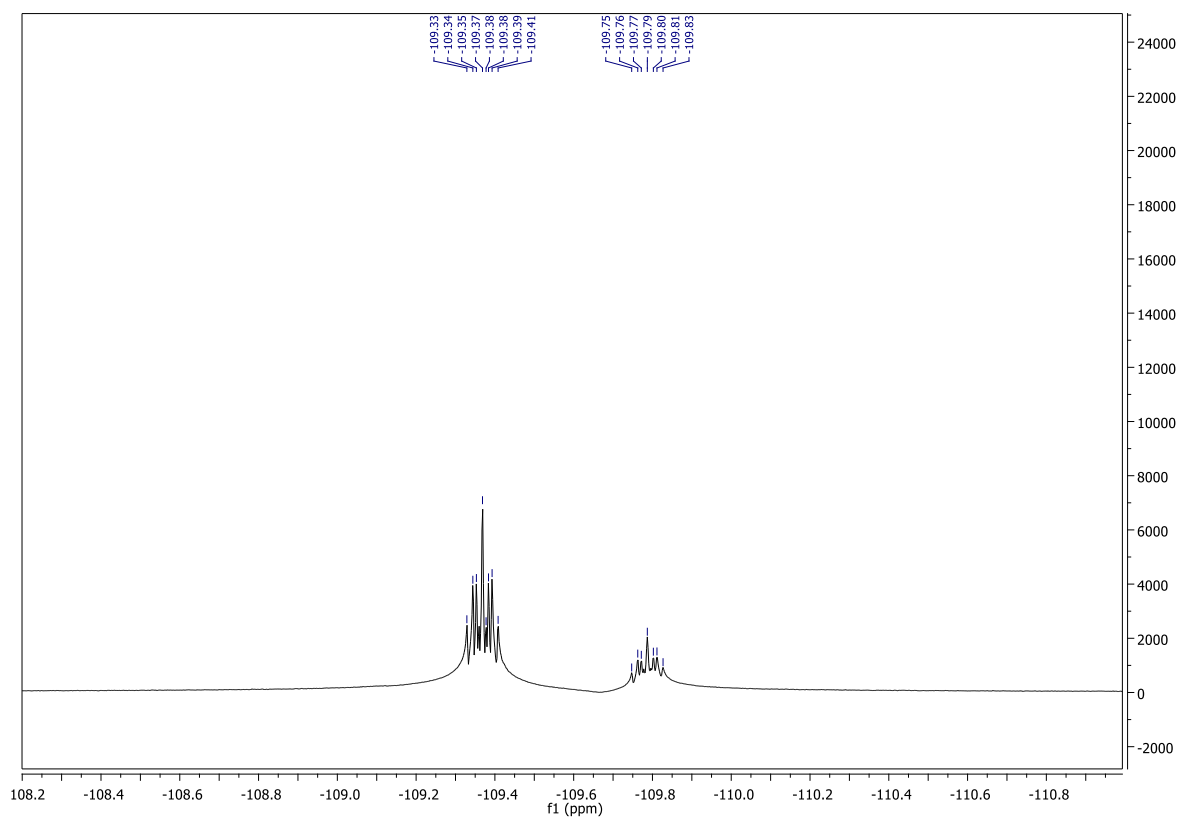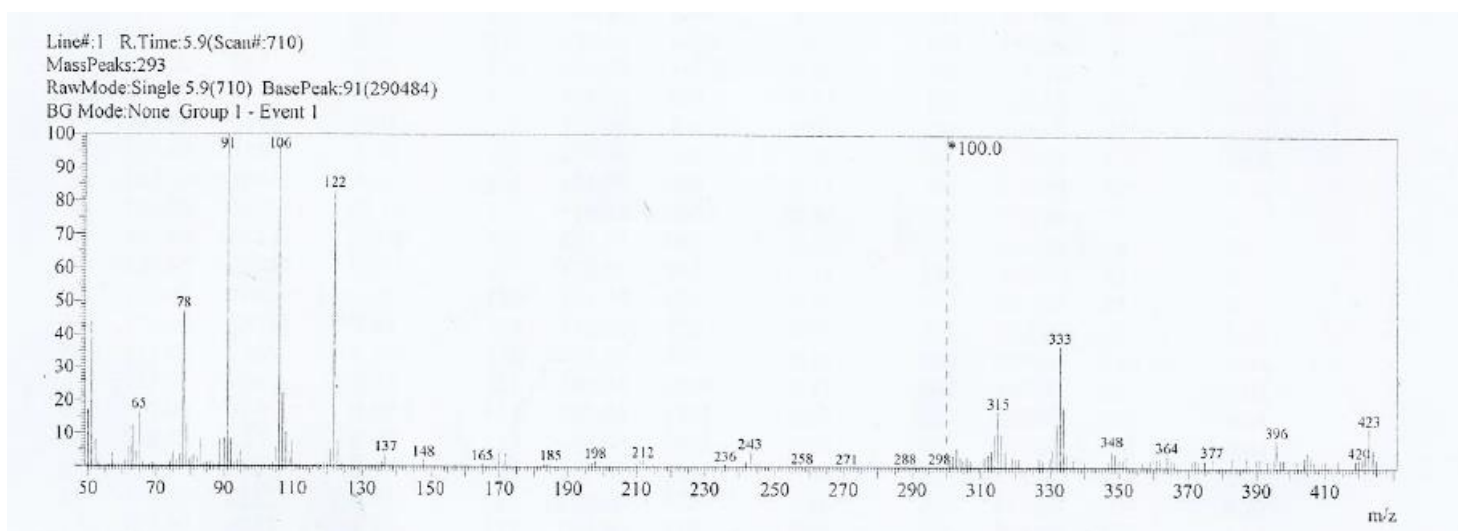

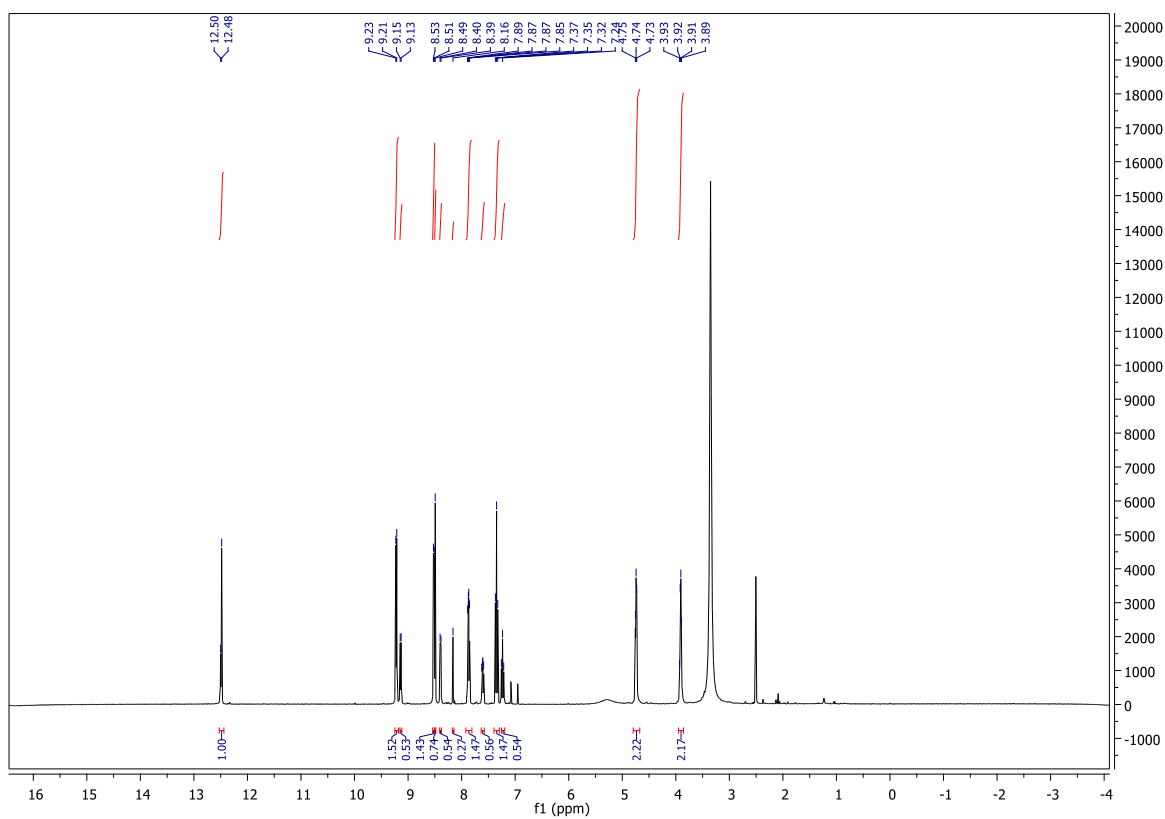

Figure S21. <sup>1</sup>H NMR of Compound 7

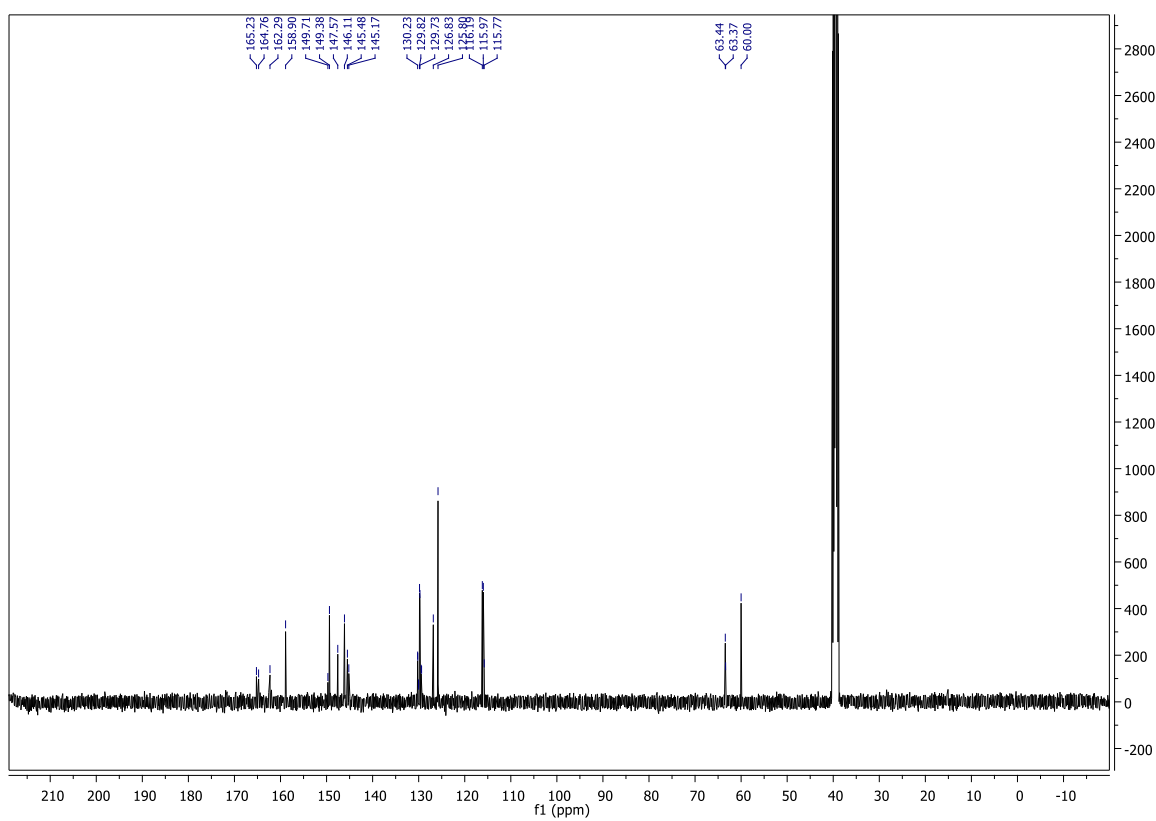

Figure S22. <sup>13</sup>C NMR of Compound 7

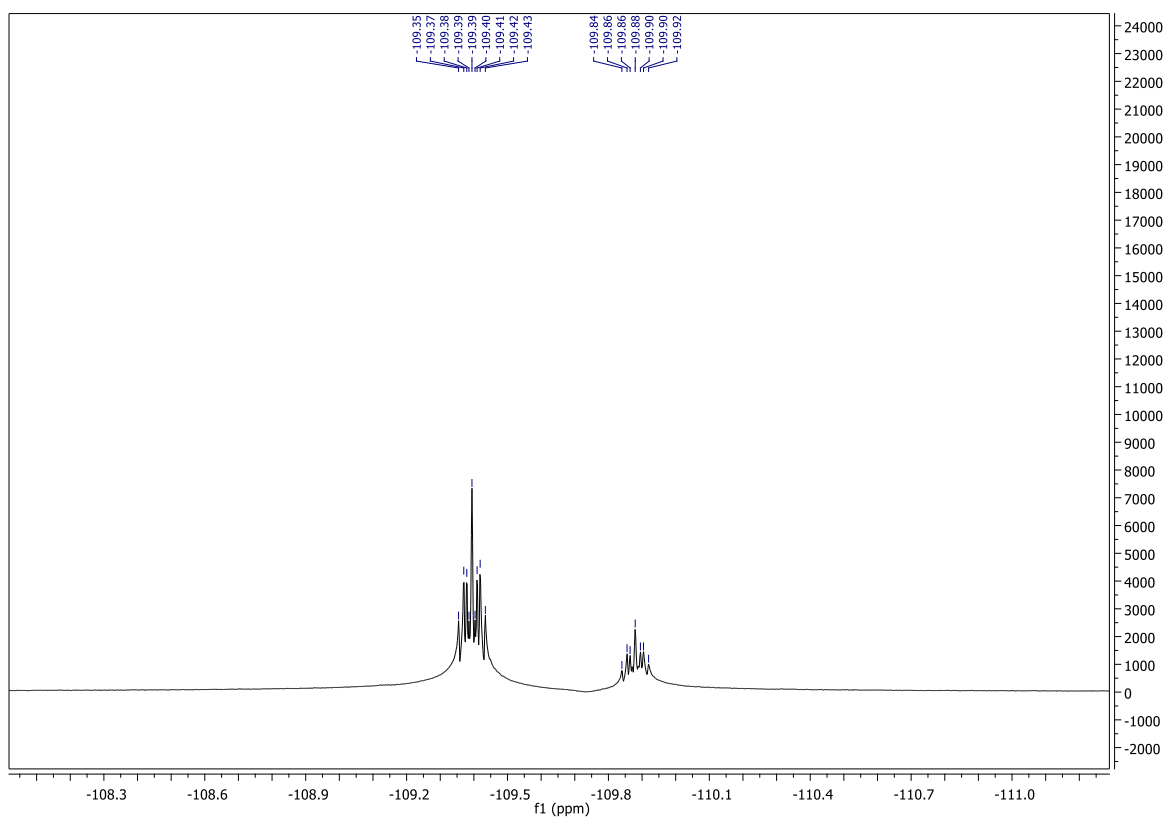

Figure S23.  $^{19}\text{F}$ NMR of Compound 7

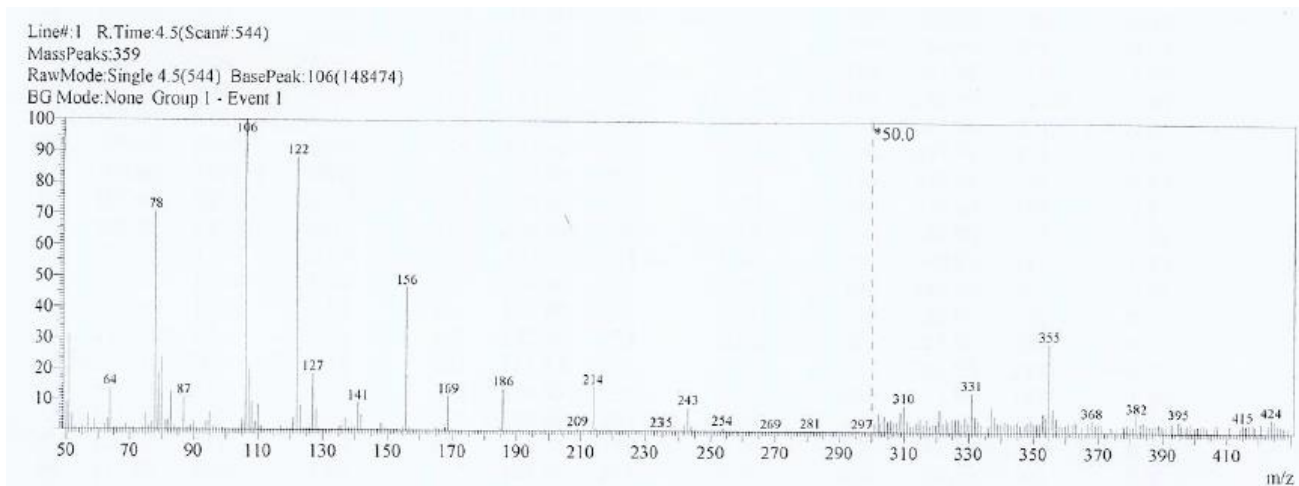

Figure S24. MS (ESI) of Compound 7

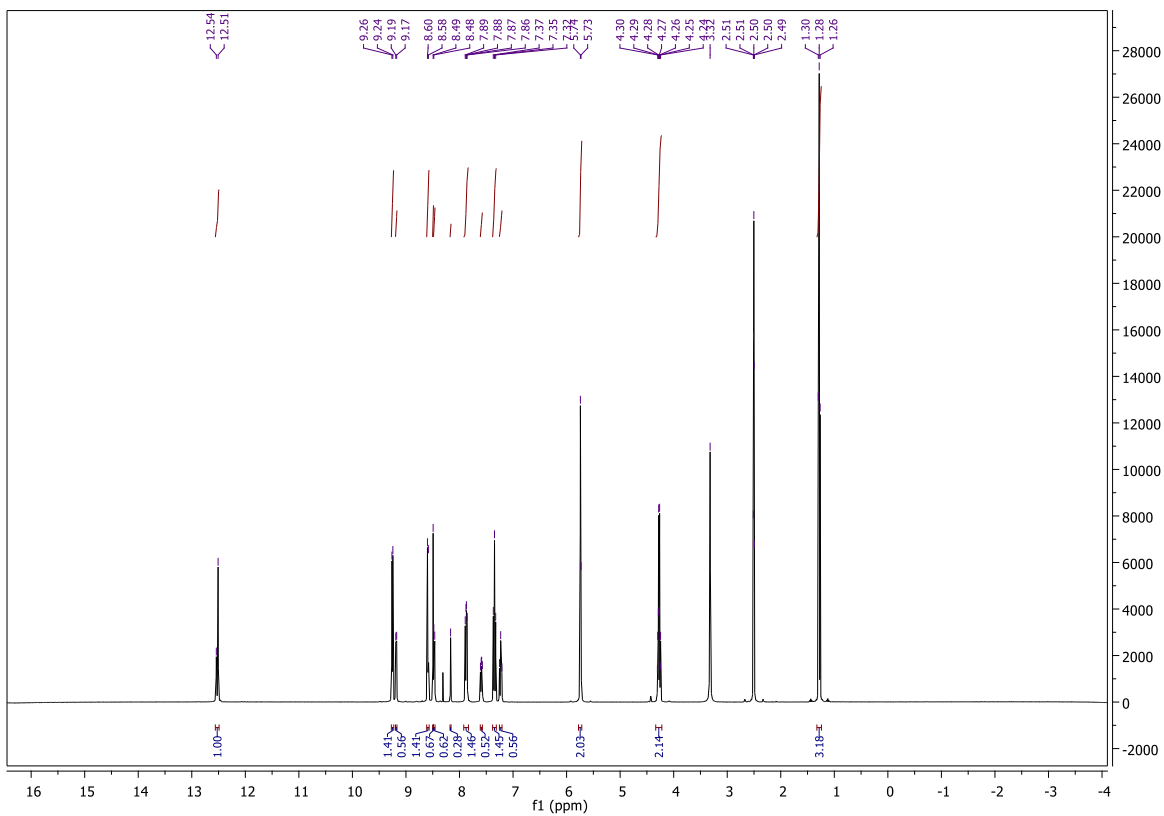

Figure S25.  $^1\text{H}$ NMR of Compound 8

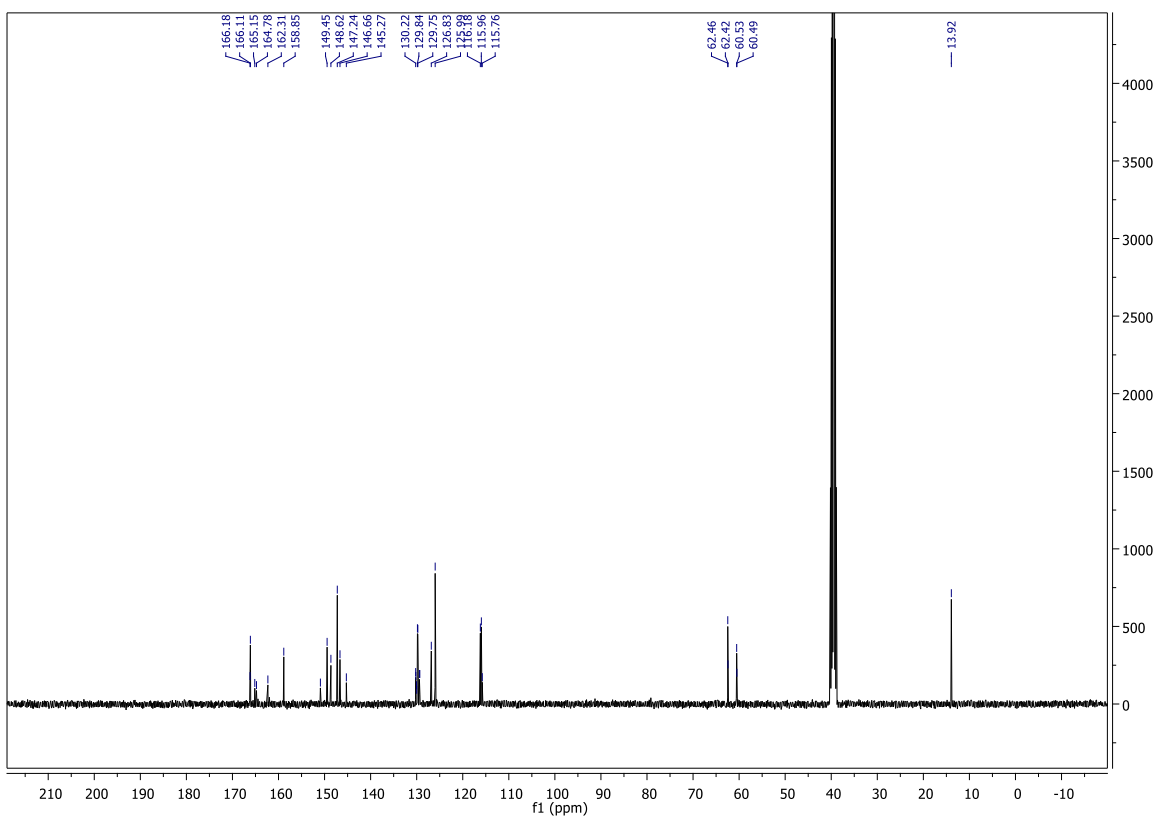

Figure S26.  $^{13}\text{C}$ NMR of Compound 8

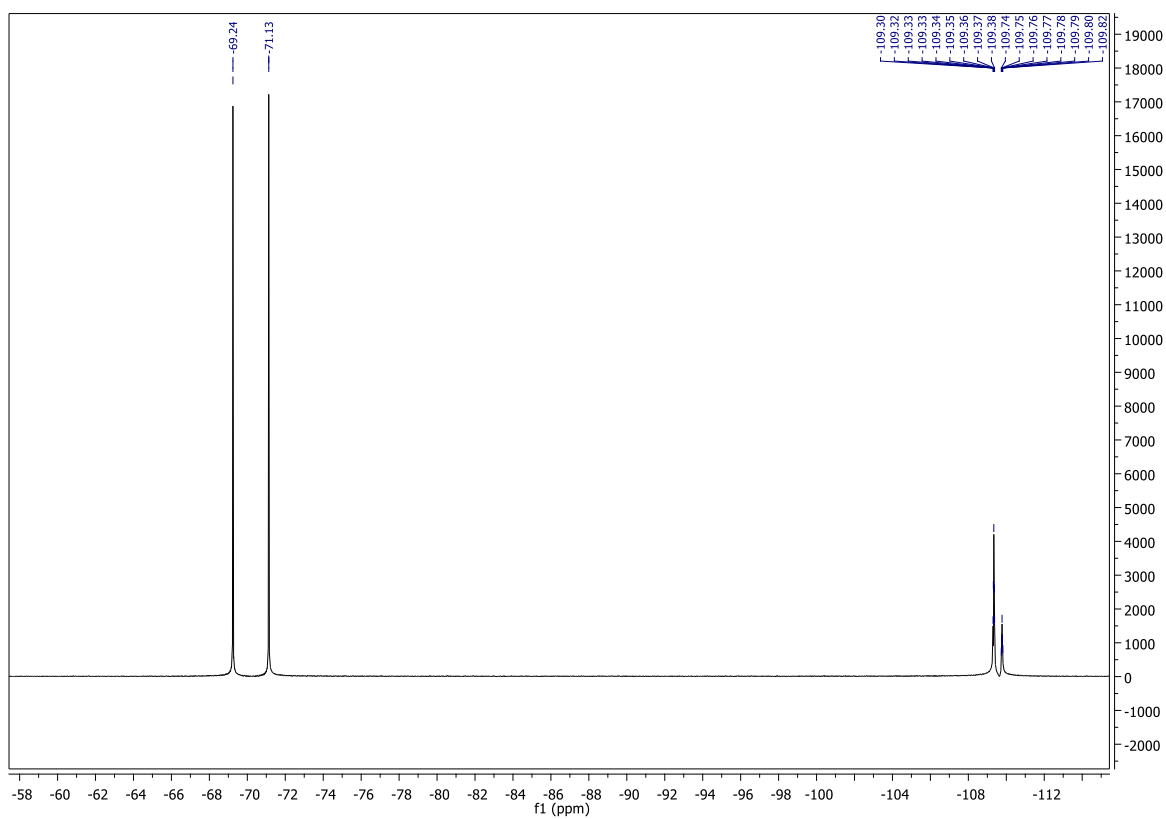

Figure S27.  $^{19}\text{F}$ NMR of Compound 8

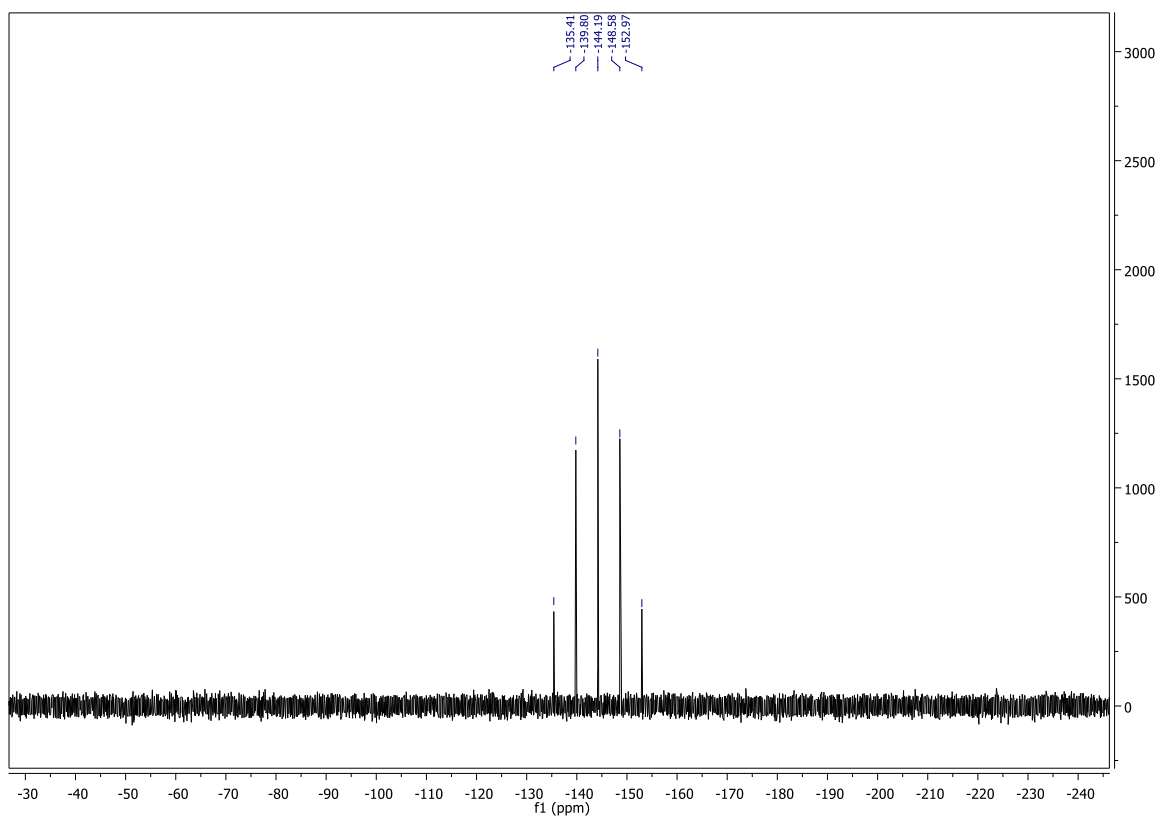

Figure S28.  $^{31}\text{P}$ NMR of Compound 8

Line#:1 R.Time:5.3(Scan#:631)  
MassPeaks:406  
RawMode:Single 5.3(631) BasePeak:106(55714)  
BG Mode:None Group 1 - Event 1

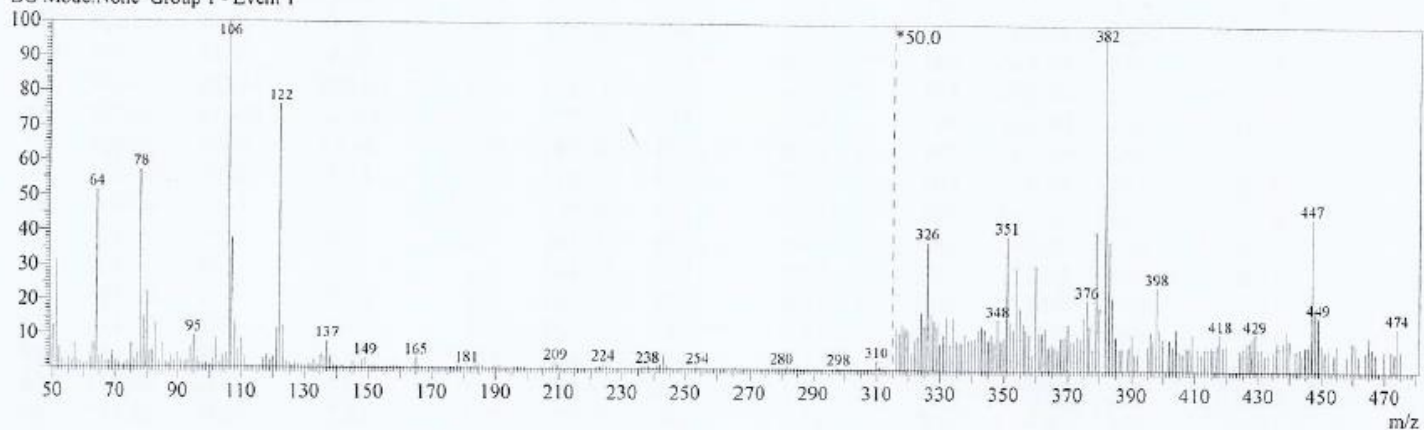

Figure S29. MS (ESI) of Compound 8

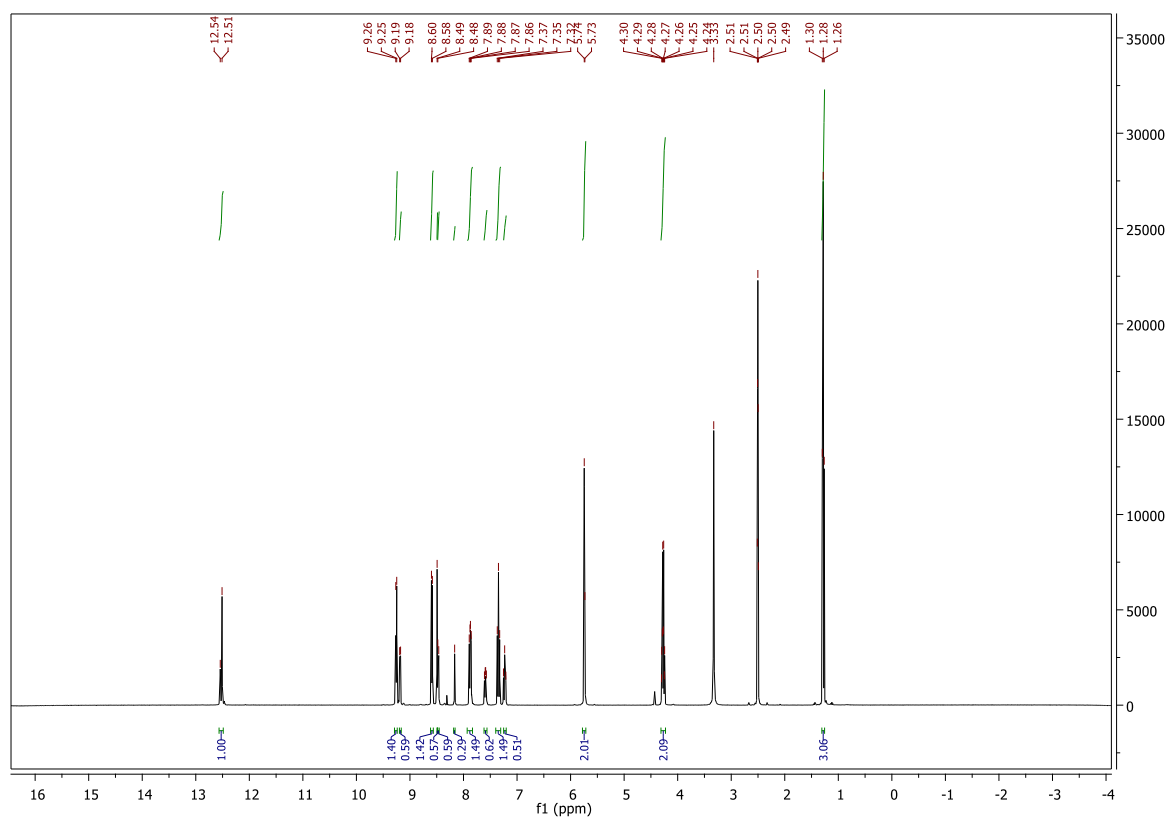

Figure S30.  $^1\text{H}$ NMR of Compound 9

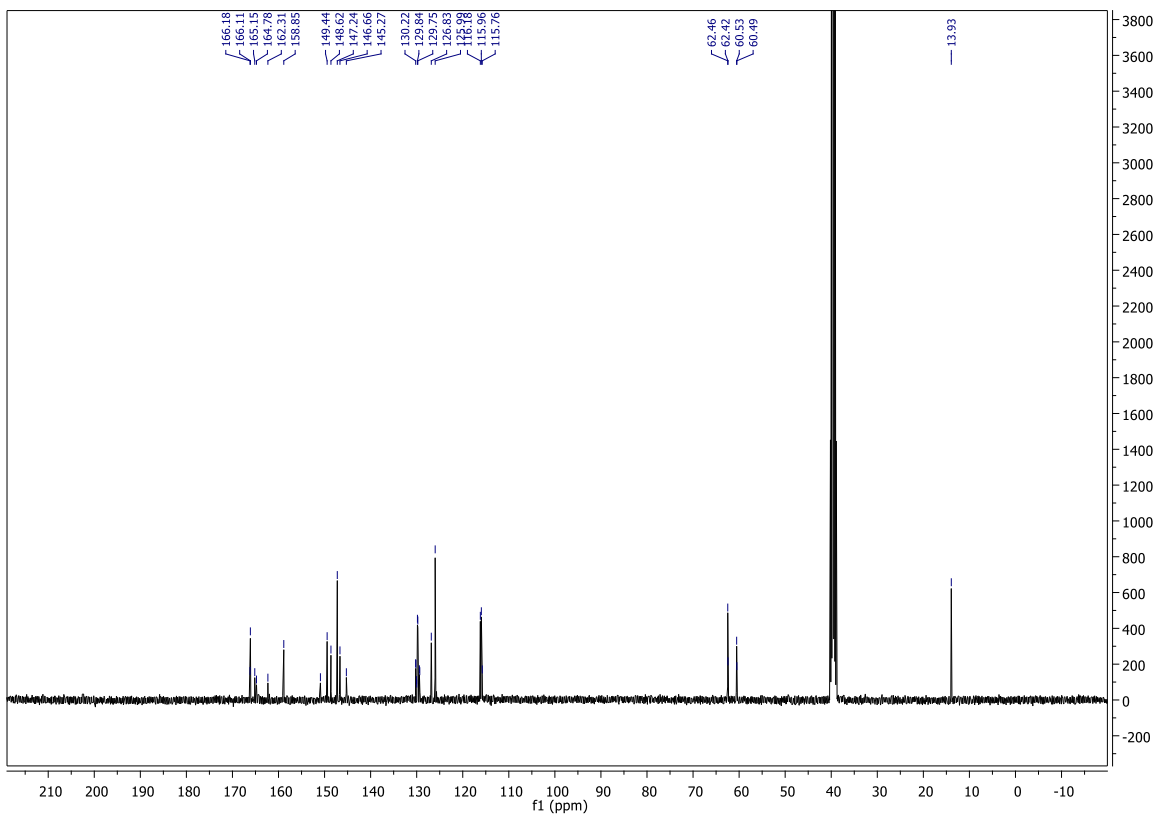

Figure S31.  $^{13}\text{C}$ NMR of Compound 9

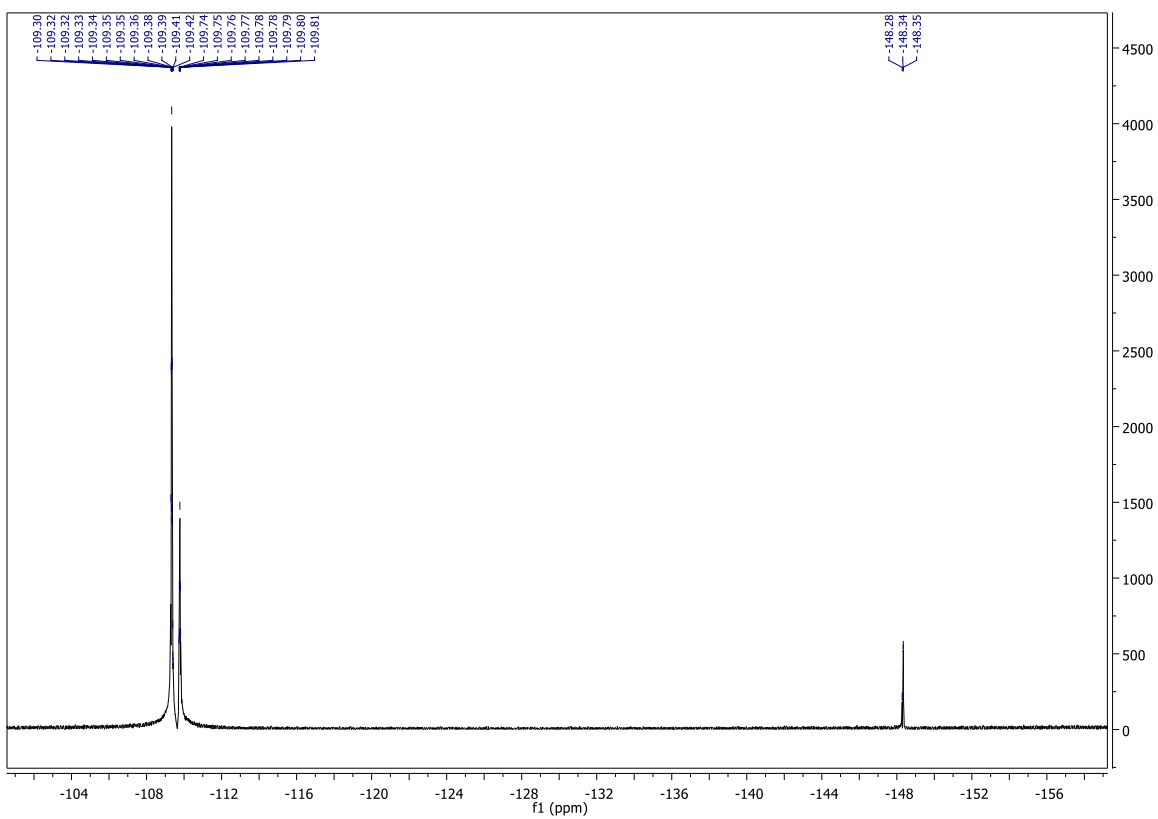

Figure S32.  $^{19}\text{F}$ NMR of Compound 9



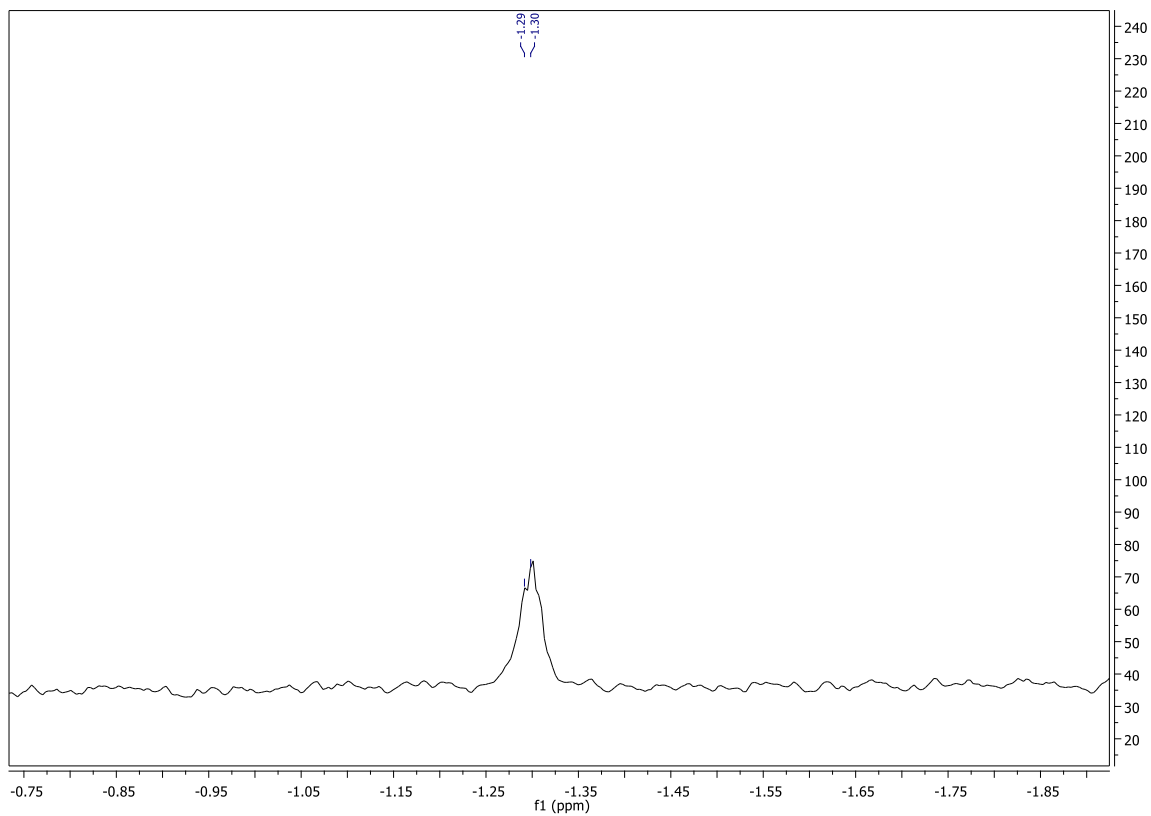

Figure S33.  $^{11}\text{B}$ NMR of Compound 9

Line#: 1 R. Time: 4.5 (Scan#: 544)

MassPeaks: 359

RawMode: Single 4.5 (544) BasePeak: 106 (148474)

BG Mode: None Group 1 - Event 1

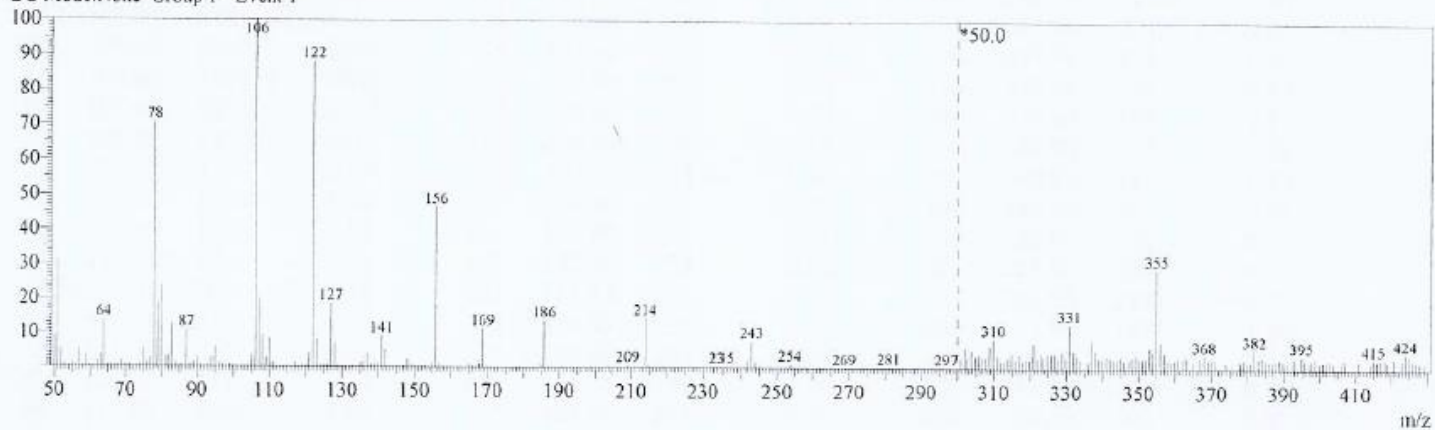

Figure S34. MS (ESI) of Compound 9

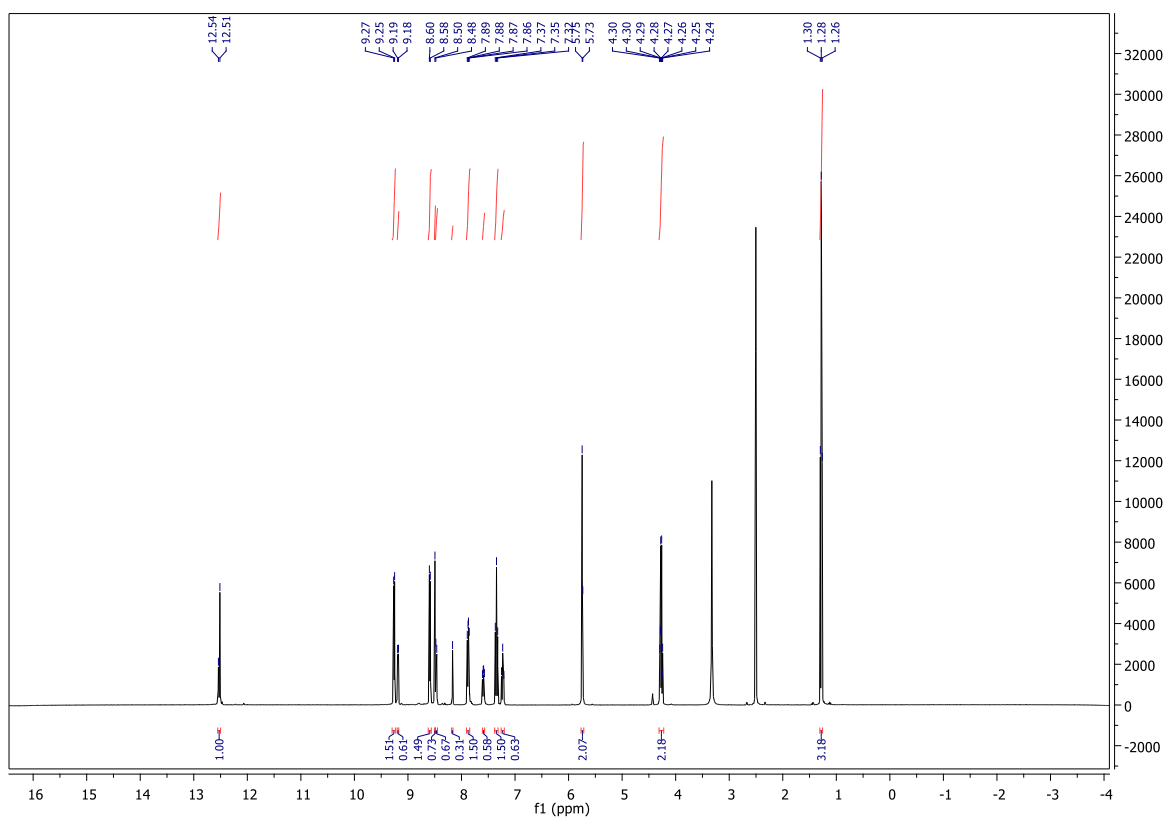

Figure S35.  $^1\text{H}$ NMR of Compound 10

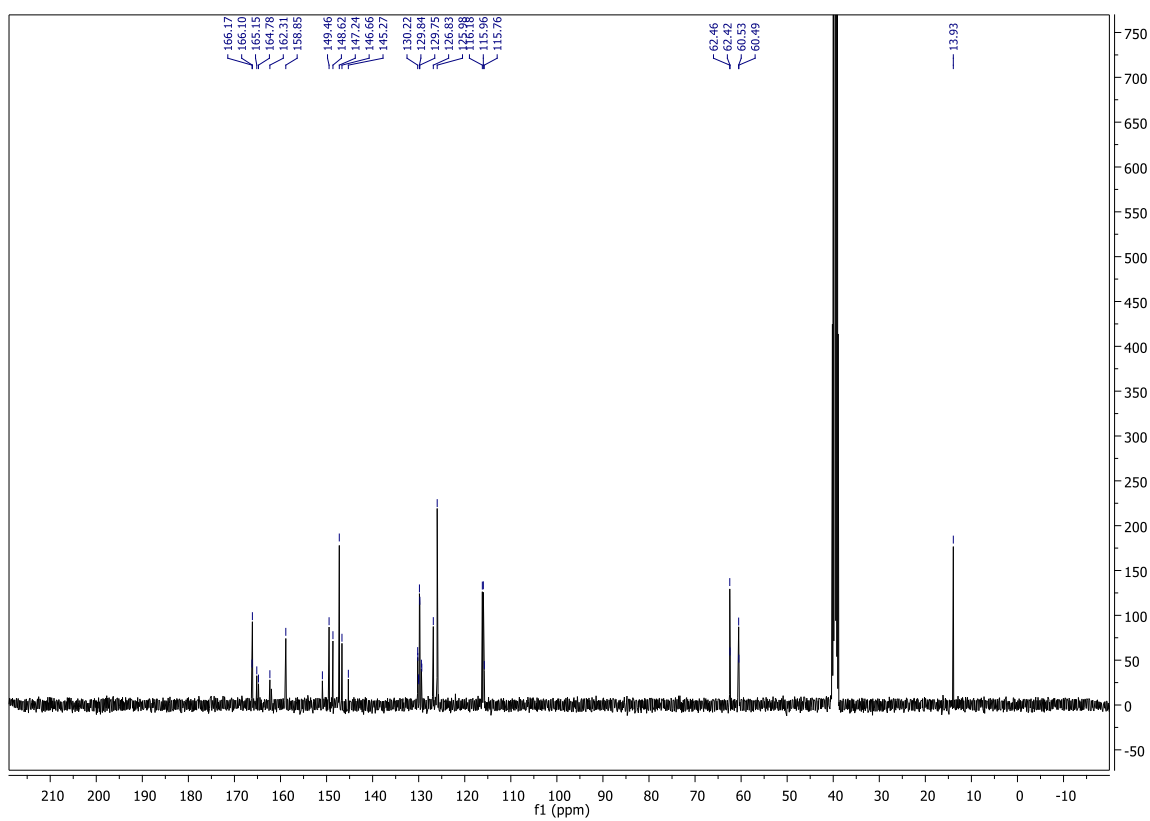

Figure S36.  $^{13}\text{C}$ NMR of Compound 10

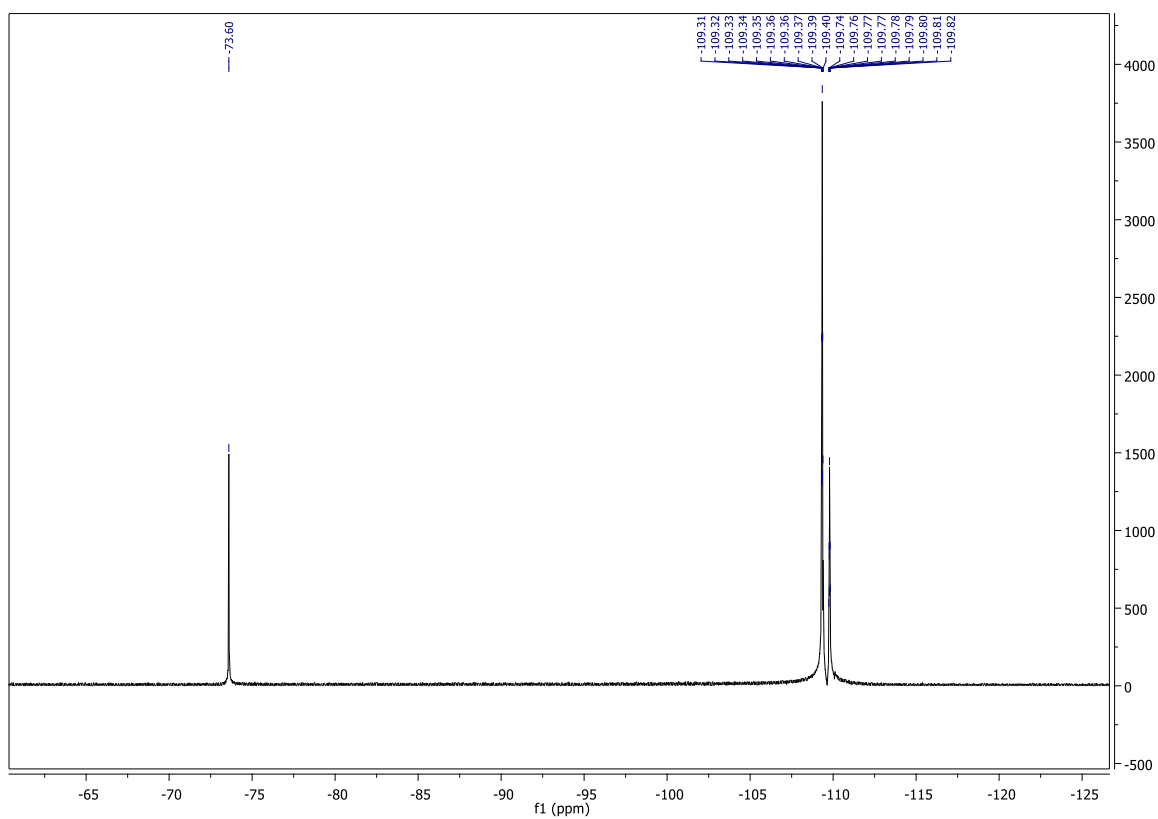

Figure S37.  $^{19}\text{F}$ NMR of Compound 10

Line#:1 R.Time:3.7(Scan#:450)

MassPeaks:369

RawMode:Single 3.7(450) BasePeak:106(66897)

BG Mode:None Group 1 - Event 1

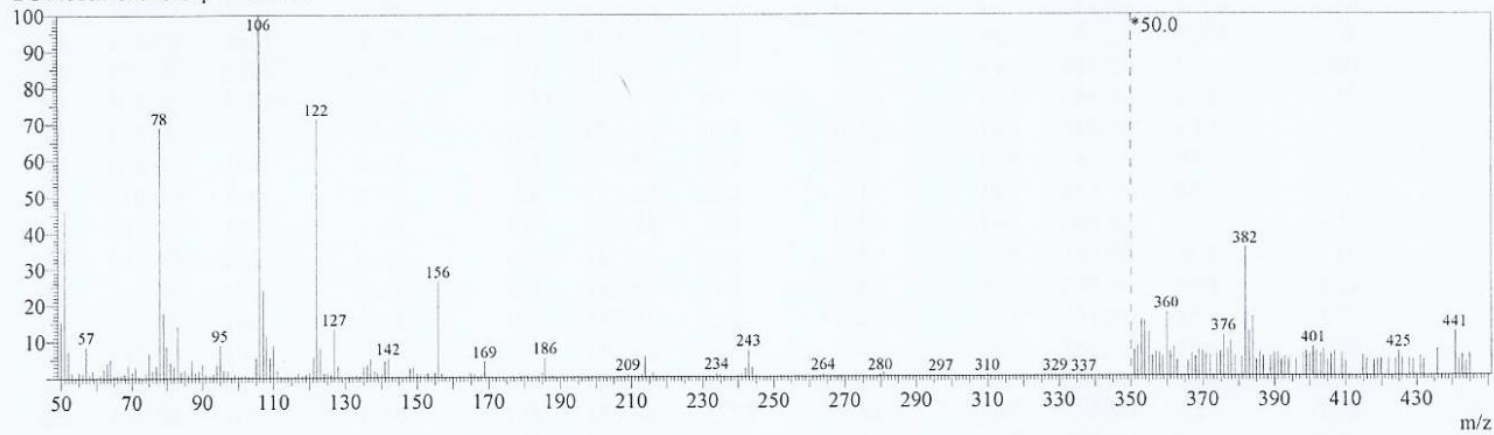

Figure S38. MS (ESI) of Compound 10

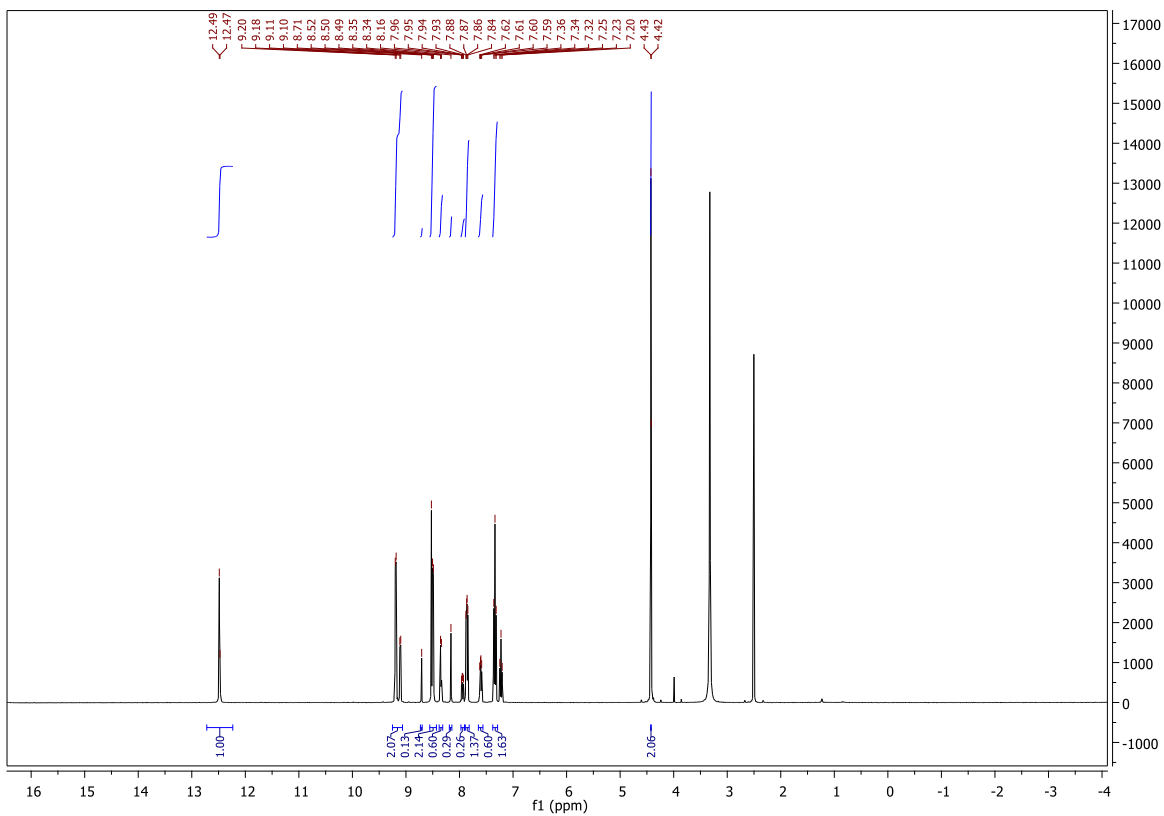

Figure S39.  $^1\text{H}$ NMR of Compound 11

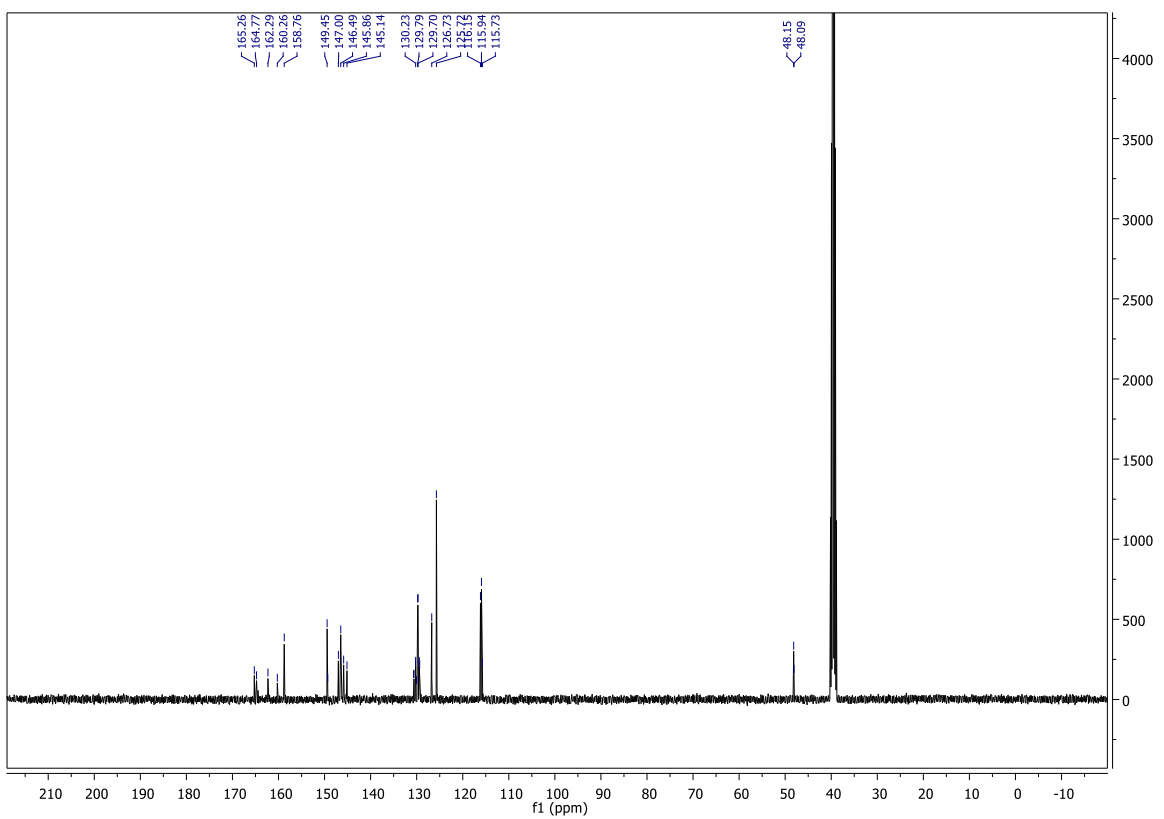

Figure S40.  $^{13}\text{C}$ NMR of Compound 11

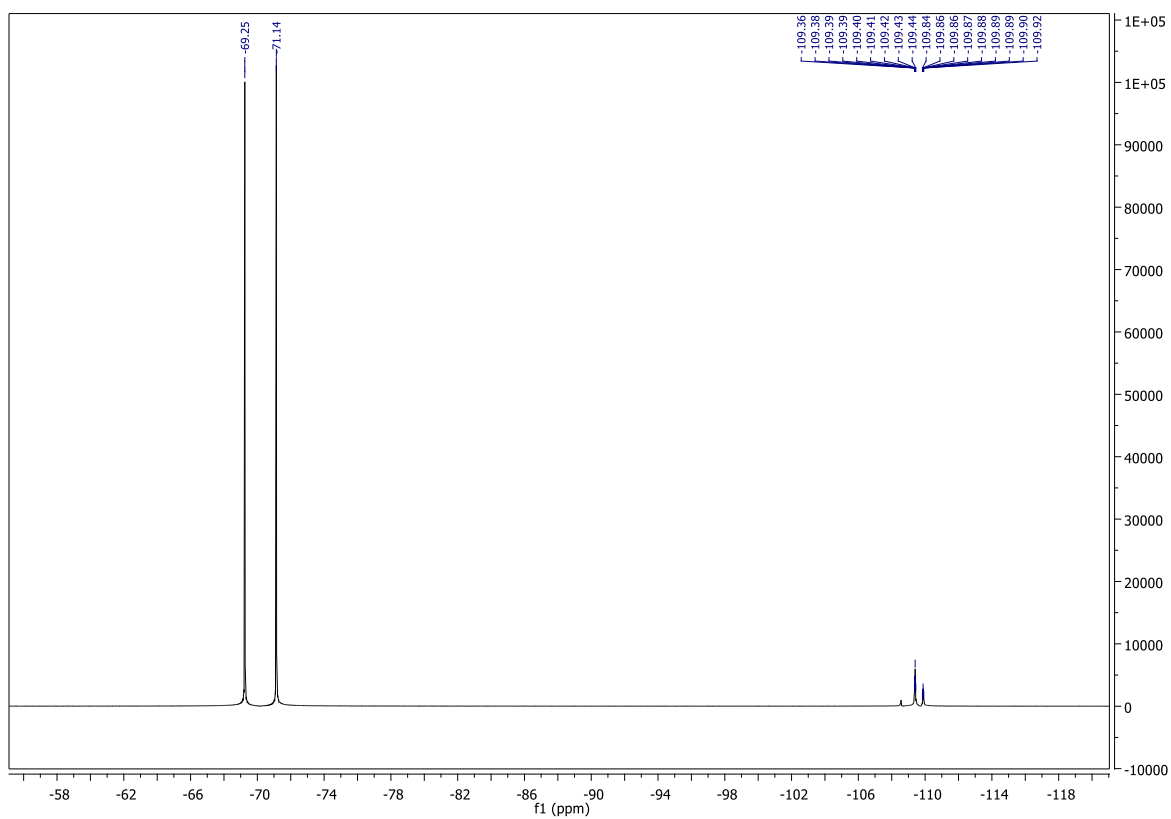

Figure S41.  $^{19}\text{F}$ NMR of Compound 11

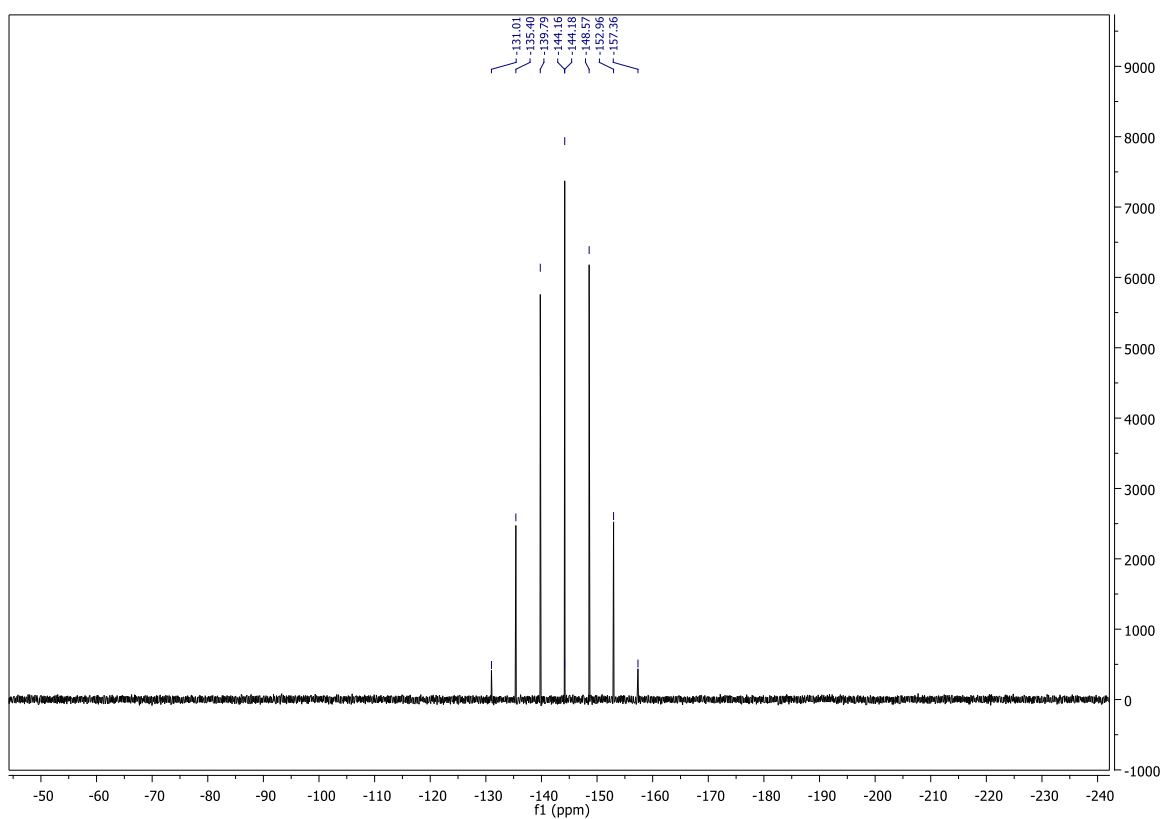

Figure S42.  $^{31}\text{P}$ NMR of Compound 11

Line#:1 R.Time:5.8(Scan#:698)  
MassPeaks:430  
RawMode:Single 5.8(698) BasePeak:122(112408)  
BG Mode:None Group 1 - Event 1

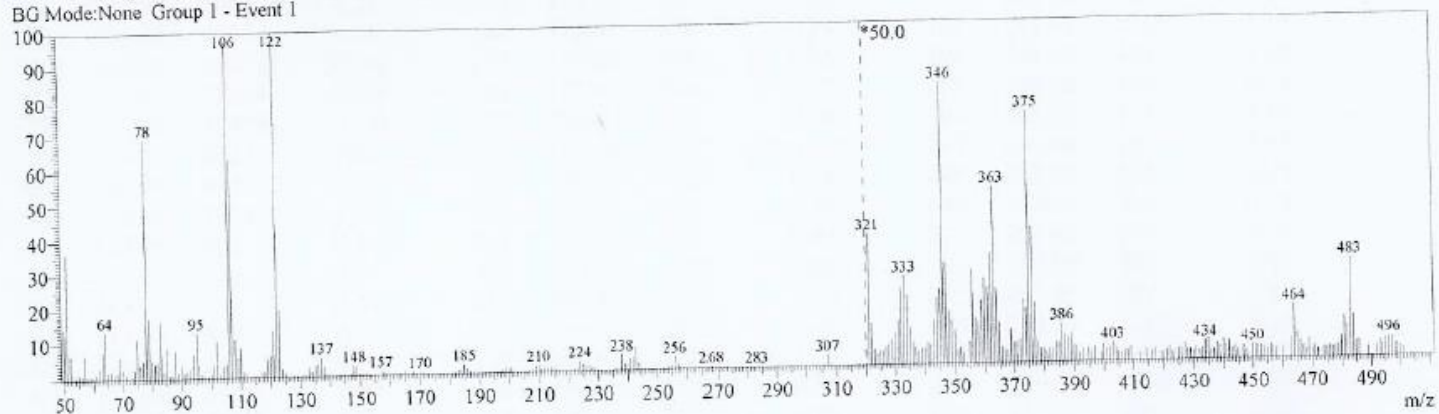

Figure S43. MS (ESI) of Compound 11

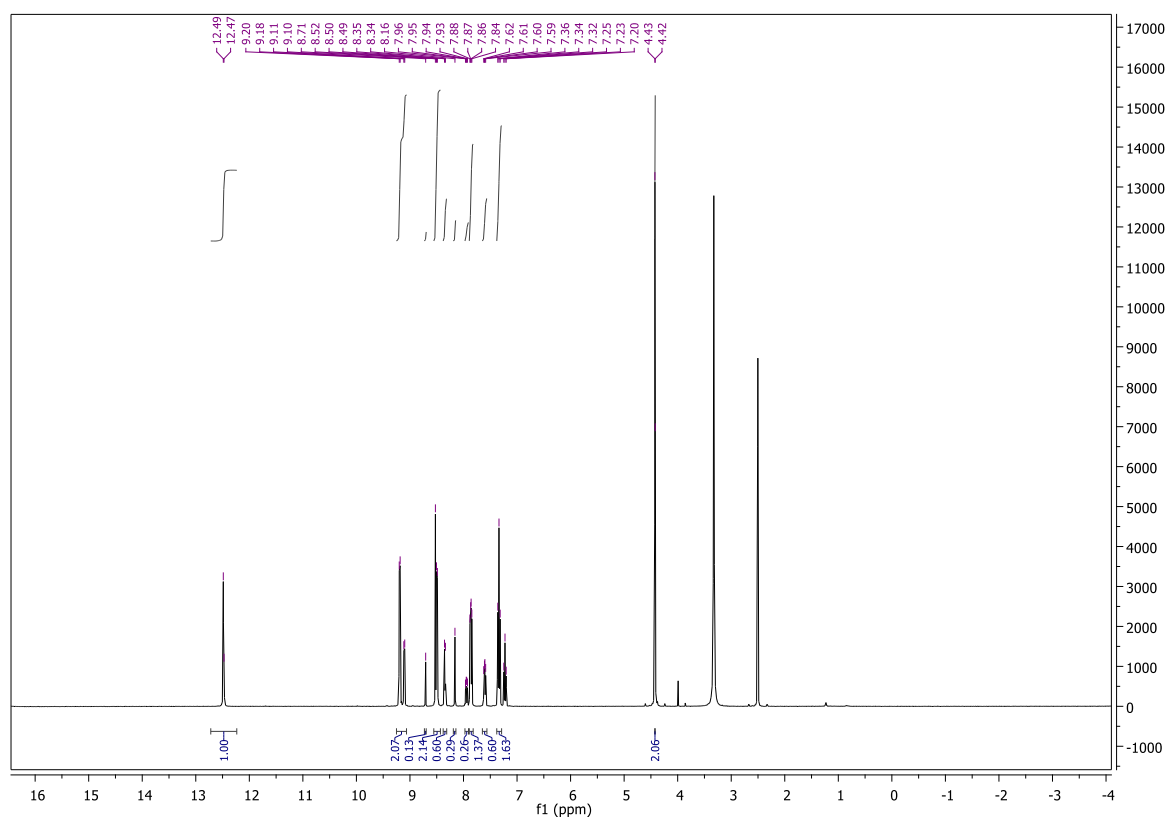

Figure S44. <sup>1</sup>H NMR of Compound 12

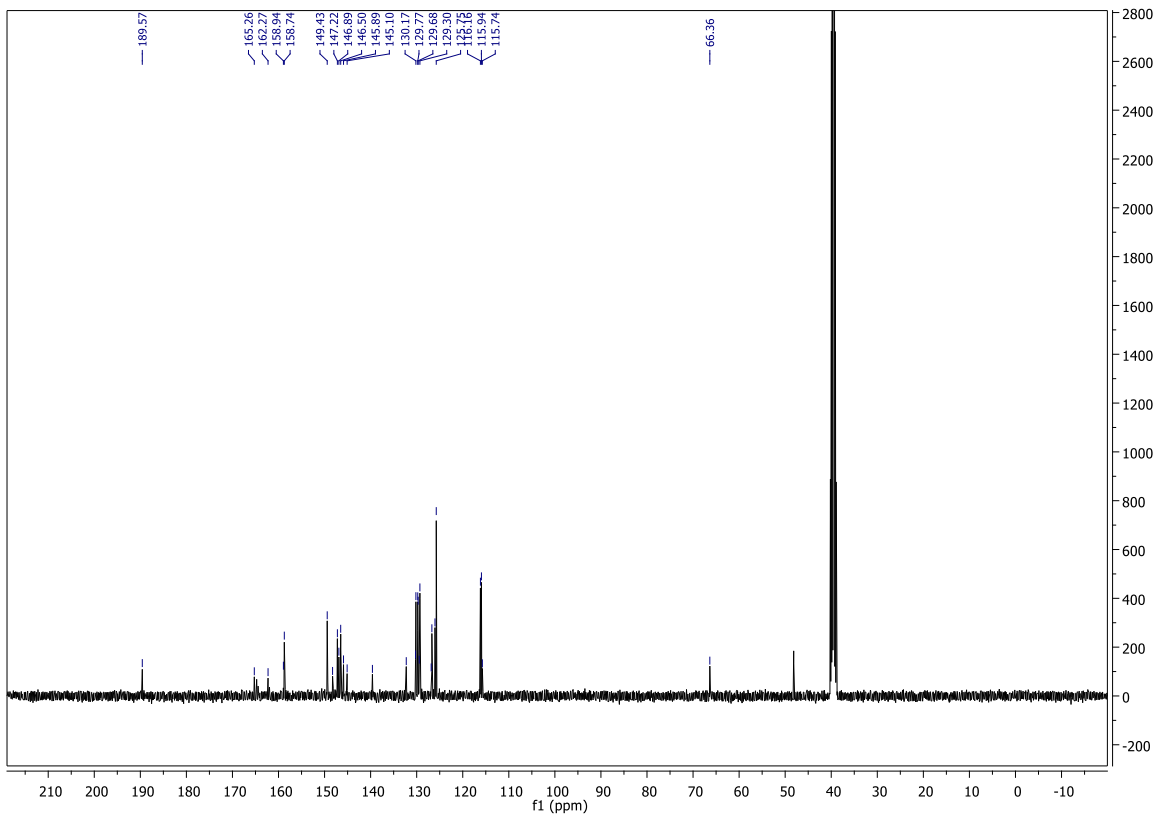

Figure S45.  $^{13}\text{C}$ NMR of Compound 12

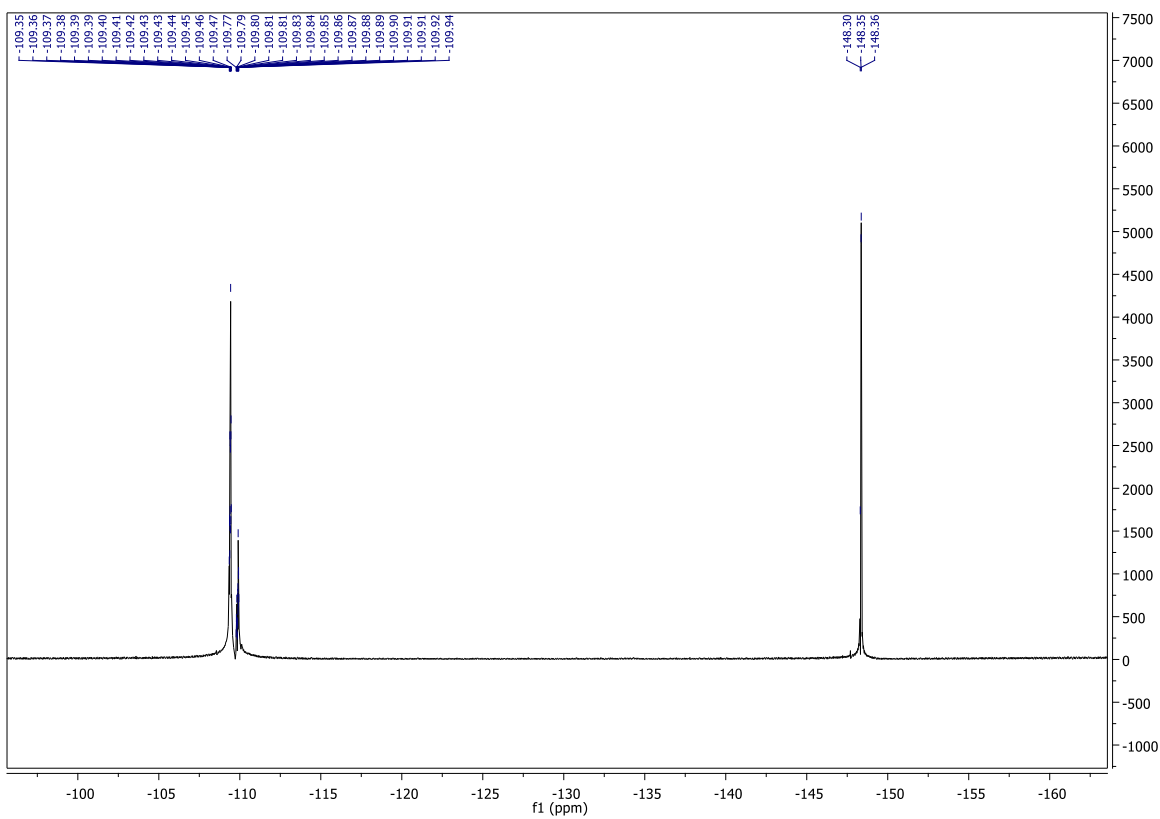

Figure S46.  $^{19}\text{F}$ NMR of Compound 12

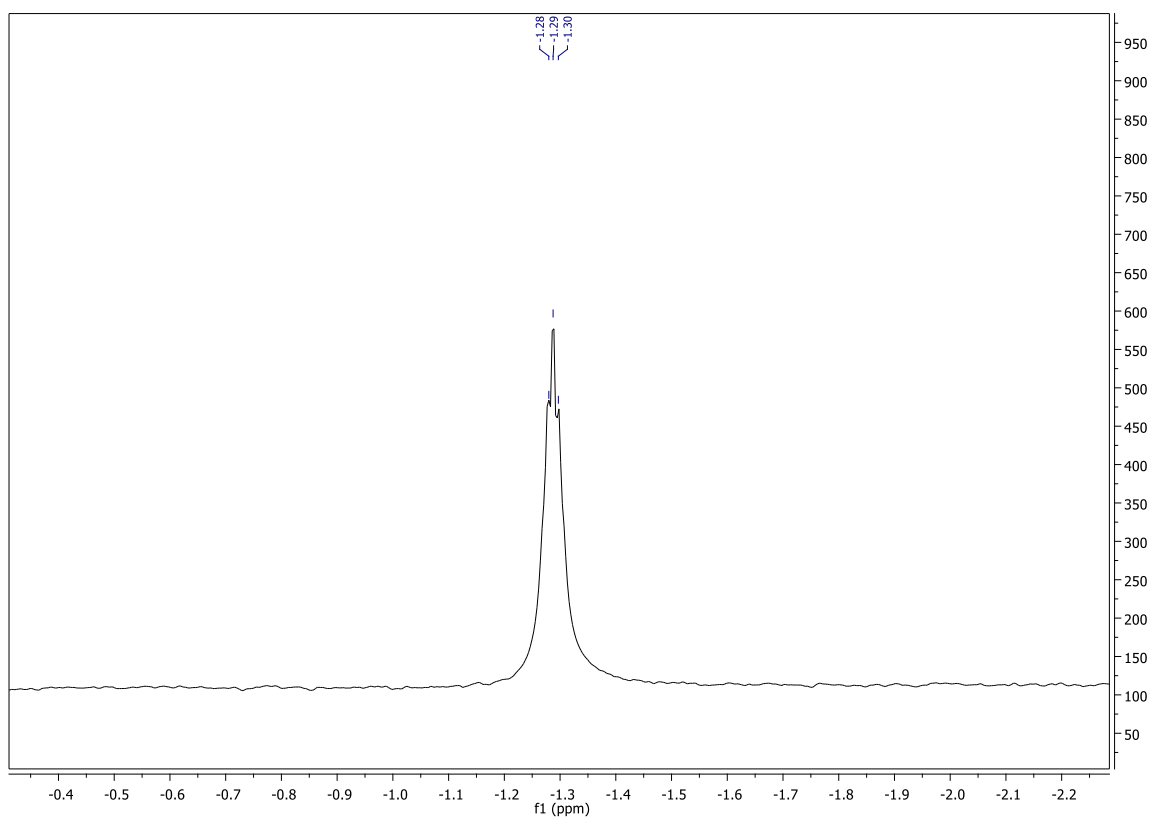

Figure S47.  $^{11}\text{B}$ NMR of Compound 12

Line#: 1 R.Time: 3.1 (Scan#: 368)  
 MassPeaks: 369  
 RawMode: Single 3.1 (368) BasePeak: 80 (29190)  
 BG Mode: None Group 1 - Event 1

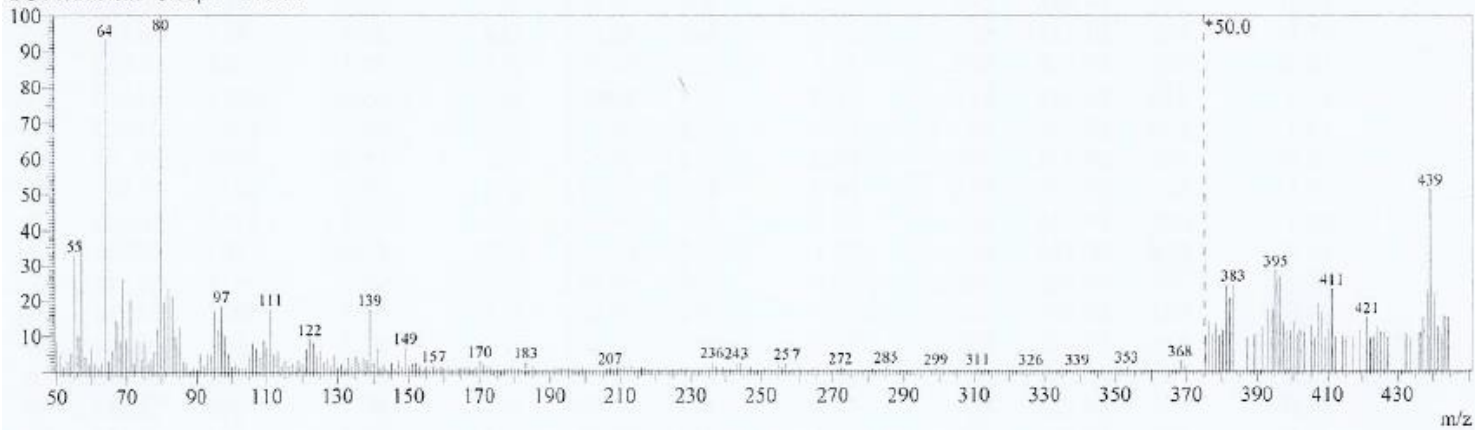

Figure S48. MS (ESI) of Compound 12



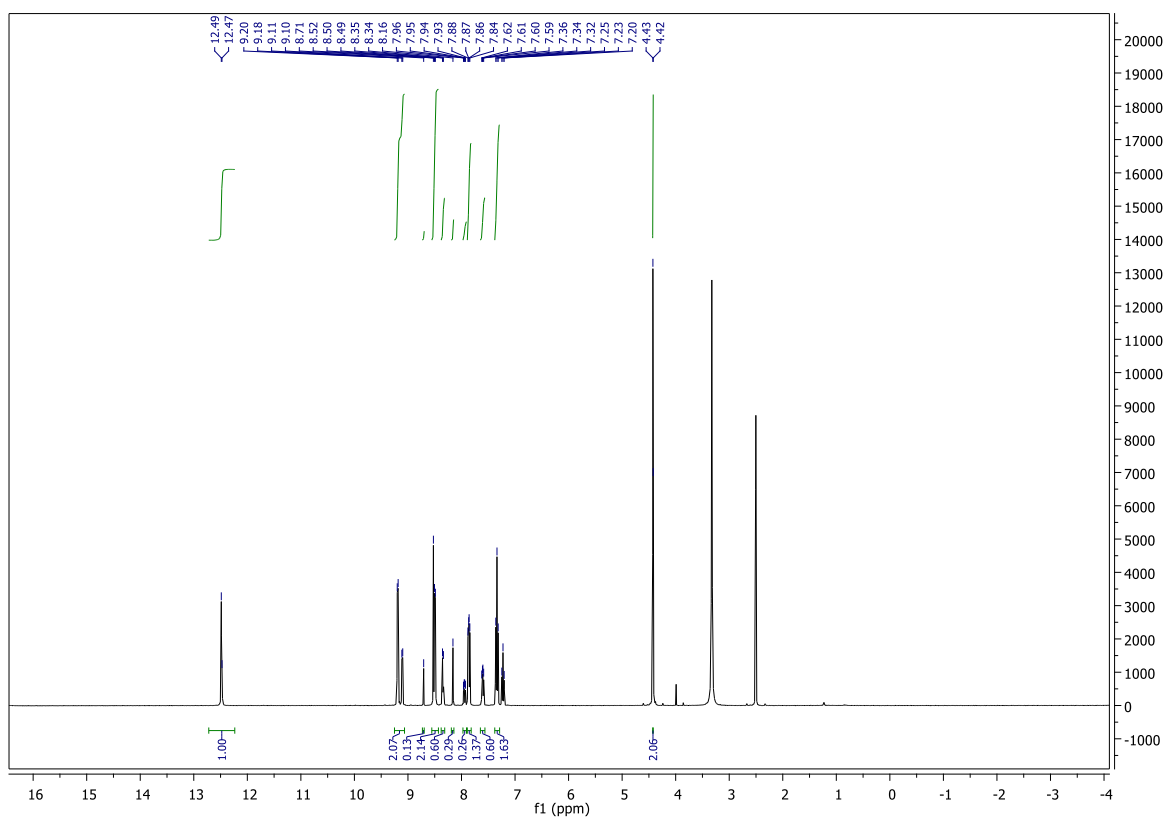

Figure S49.  $^1\text{H}$ NMR of Compound 13

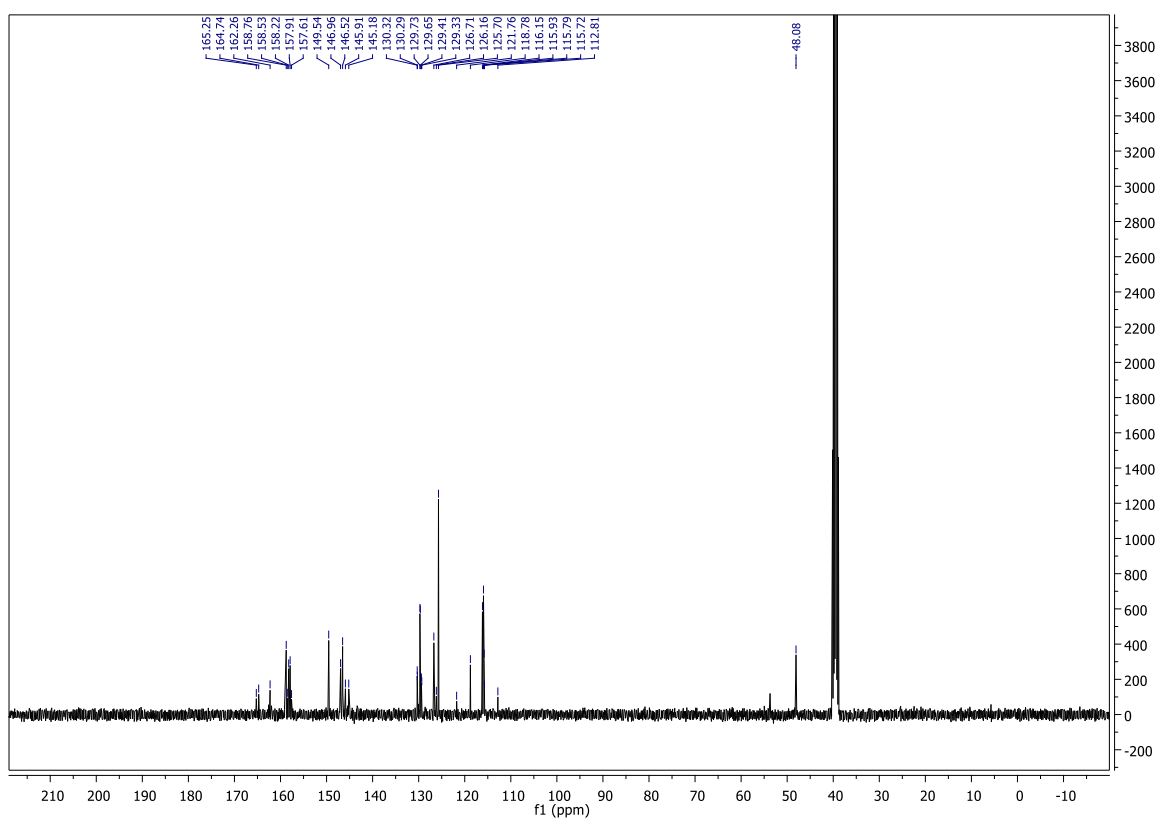

Figure S50.  $^{13}\text{C}$ NMR of Compound 13

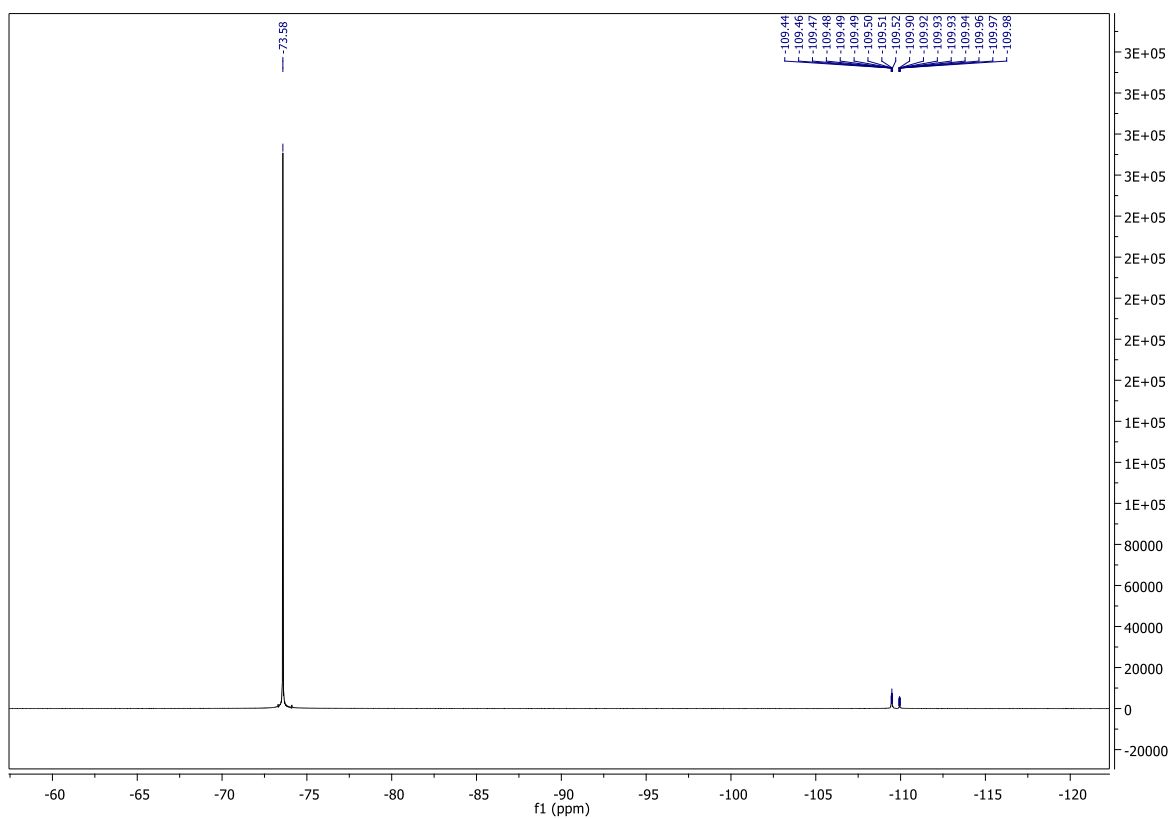

Figure S51.  $^{19}\text{F}$ NMR of Compound 13

Line#:1 R.Time:4.7(Scan#:567)

MassPeaks:406

RawMode:Single 4.7(567) BasePeak:106(53359)

BG Mode:None Group 1 - Event 1

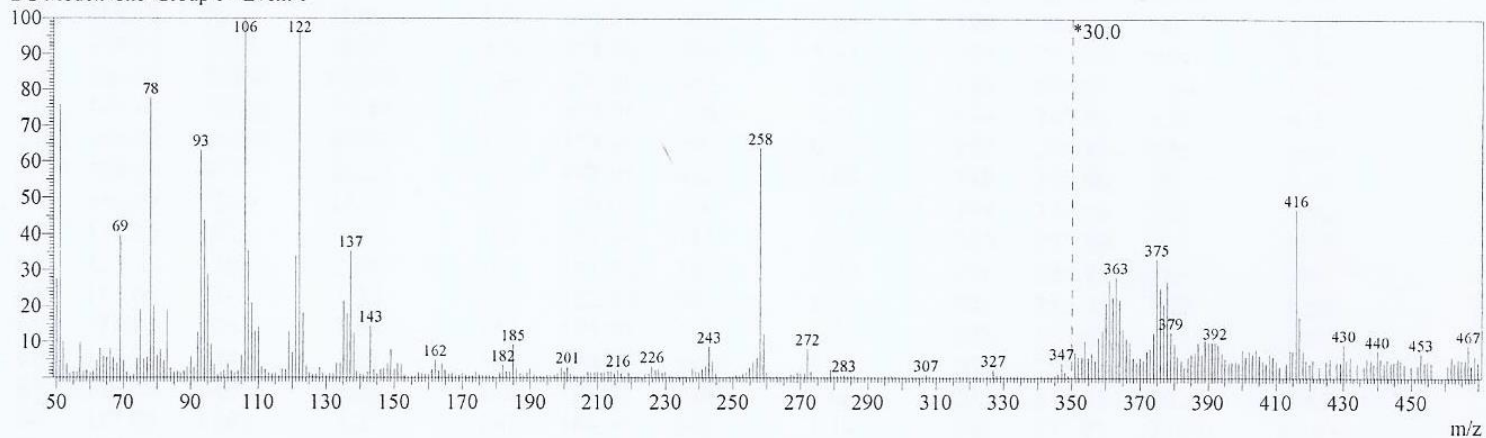

Figure S52. MS (ESI) of Compound 13

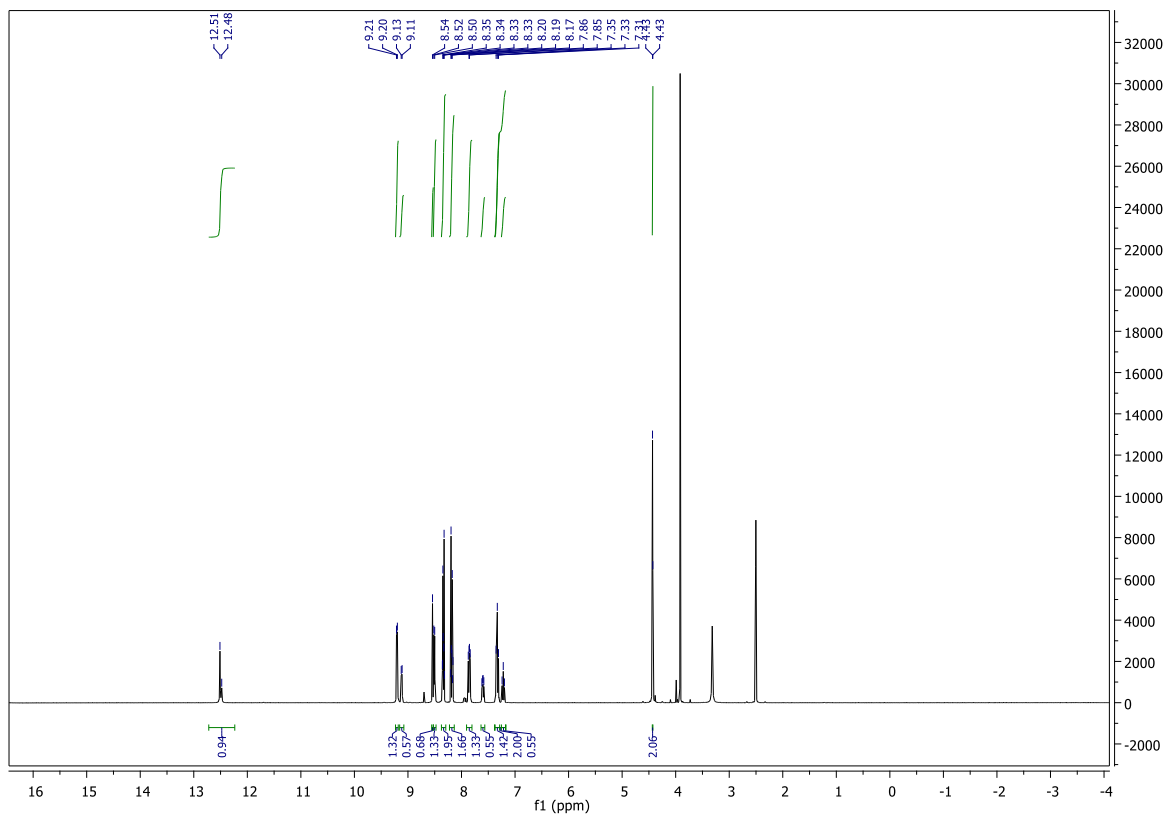

Figure S53.  $^1\text{H}$ NMR of Compound 14

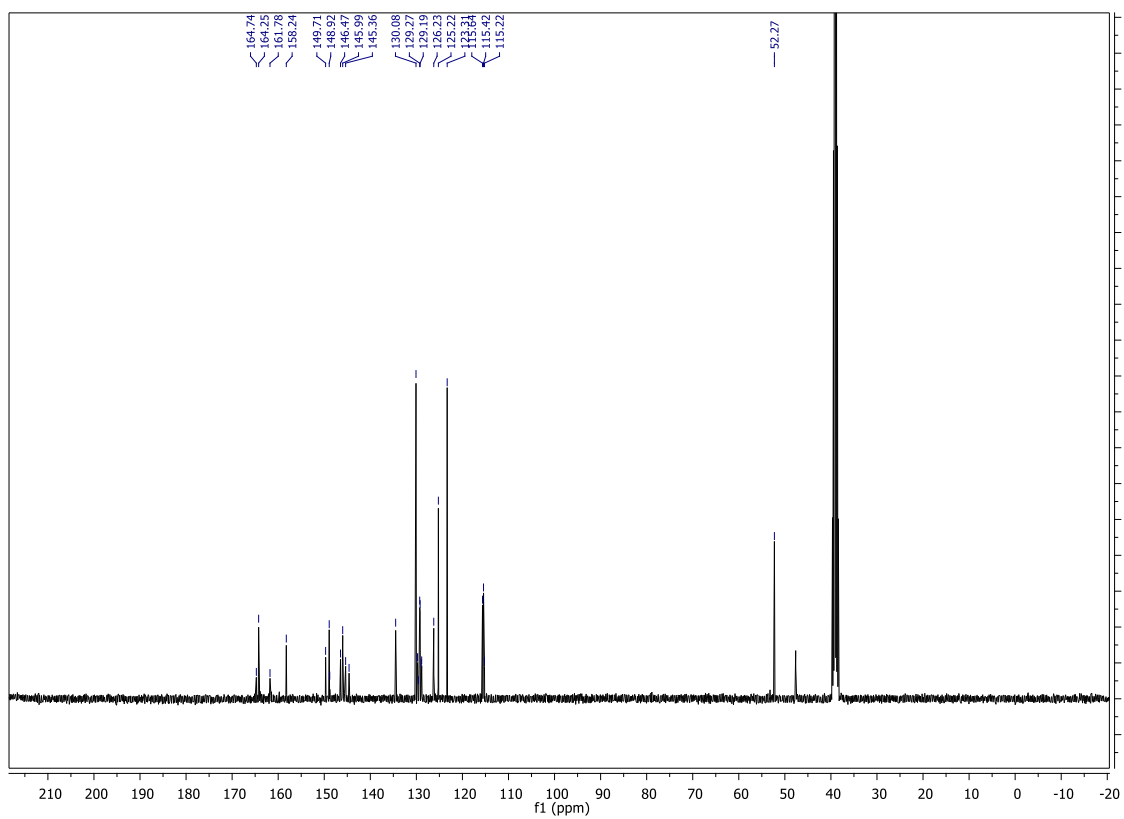

Figure S54.  $^{13}\text{C}$ NMR of Compound 14

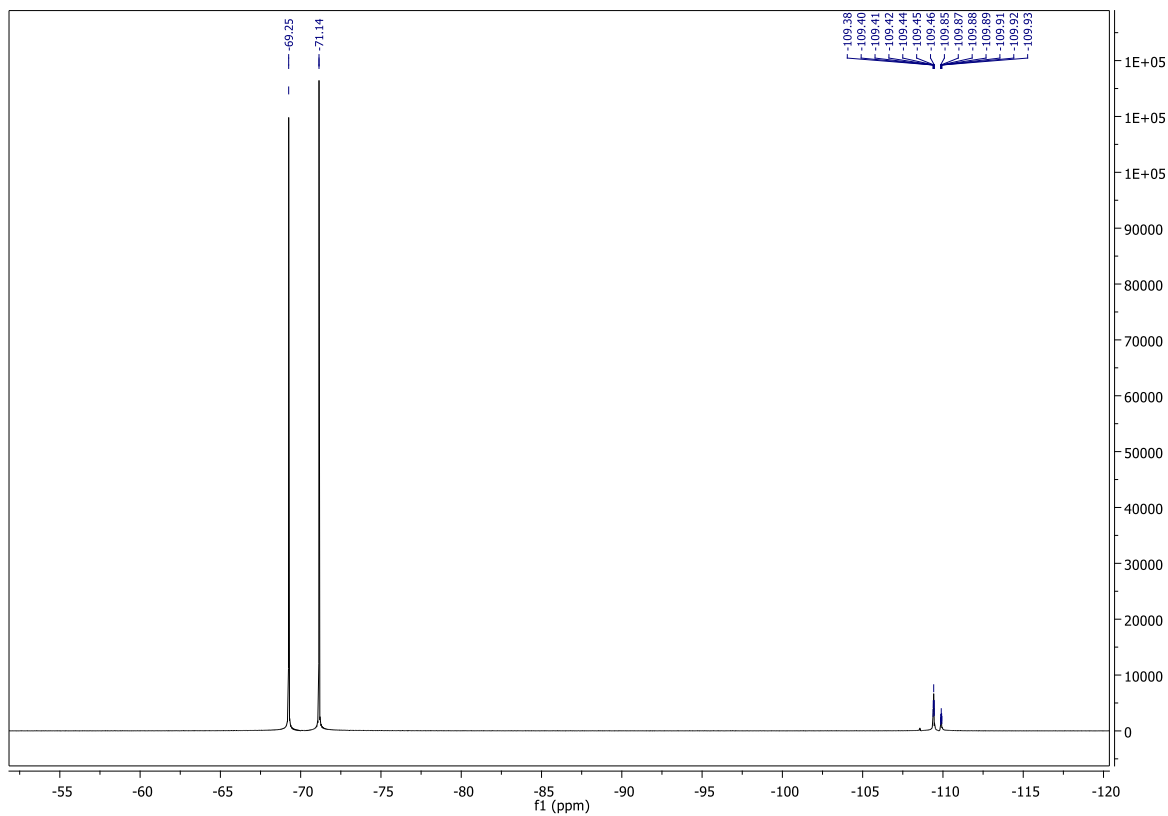

Figure S55.  $^{19}\text{F}$ NMR of Compound 14

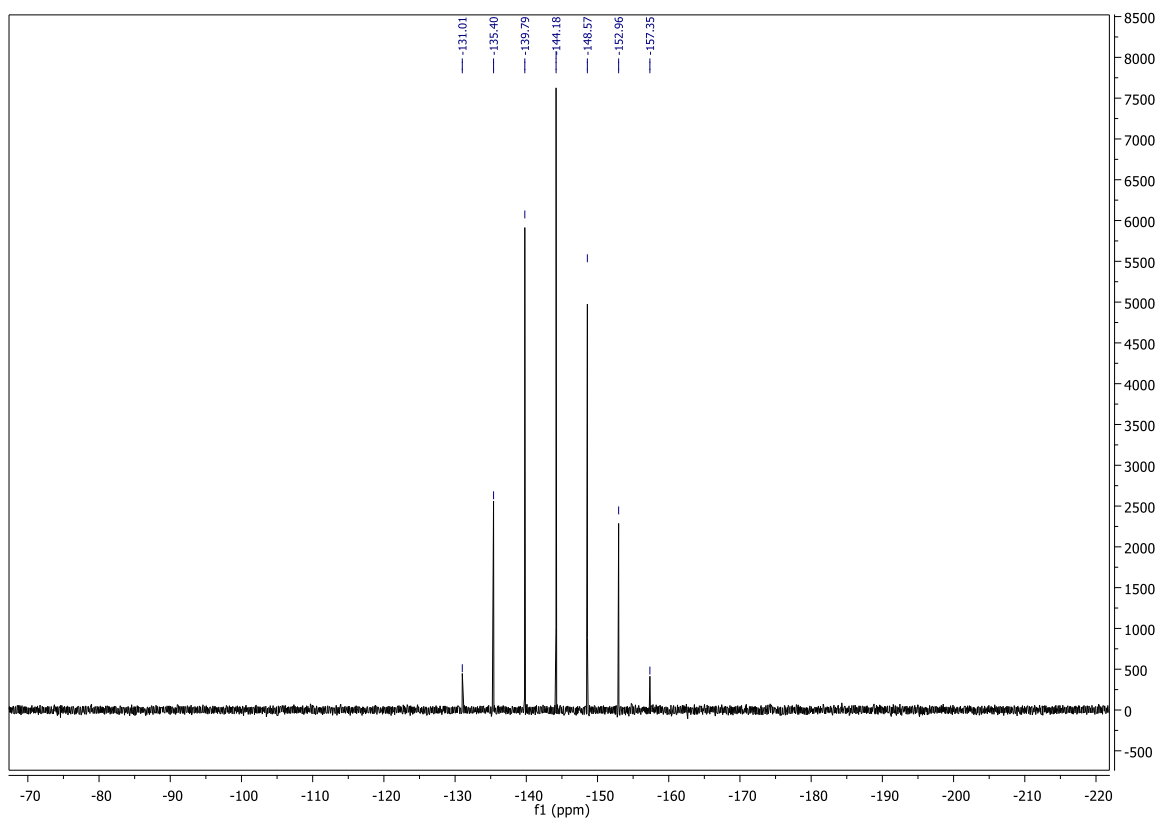

Figure S56.  $^{31}\text{P}$ NMR of Compound 14

Line#:1 R.Time:7.9(Scan#:946)  
MassPeaks:355  
RawMode:Single 7.9(946) BasePeak:106(13114)  
BG Mode:None Group 1 - Event 1

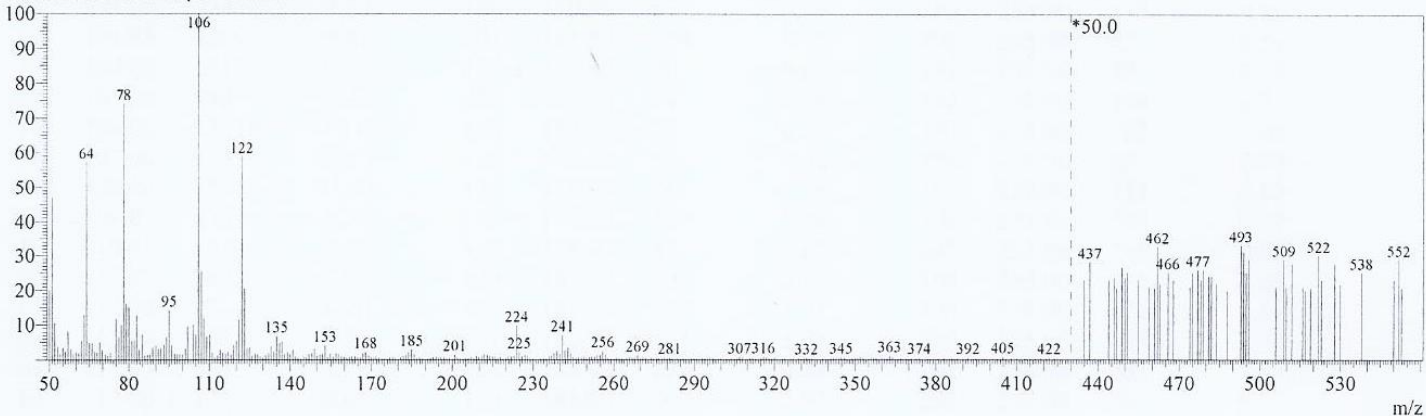

Figure S57. MS (ESI) of Compound 14

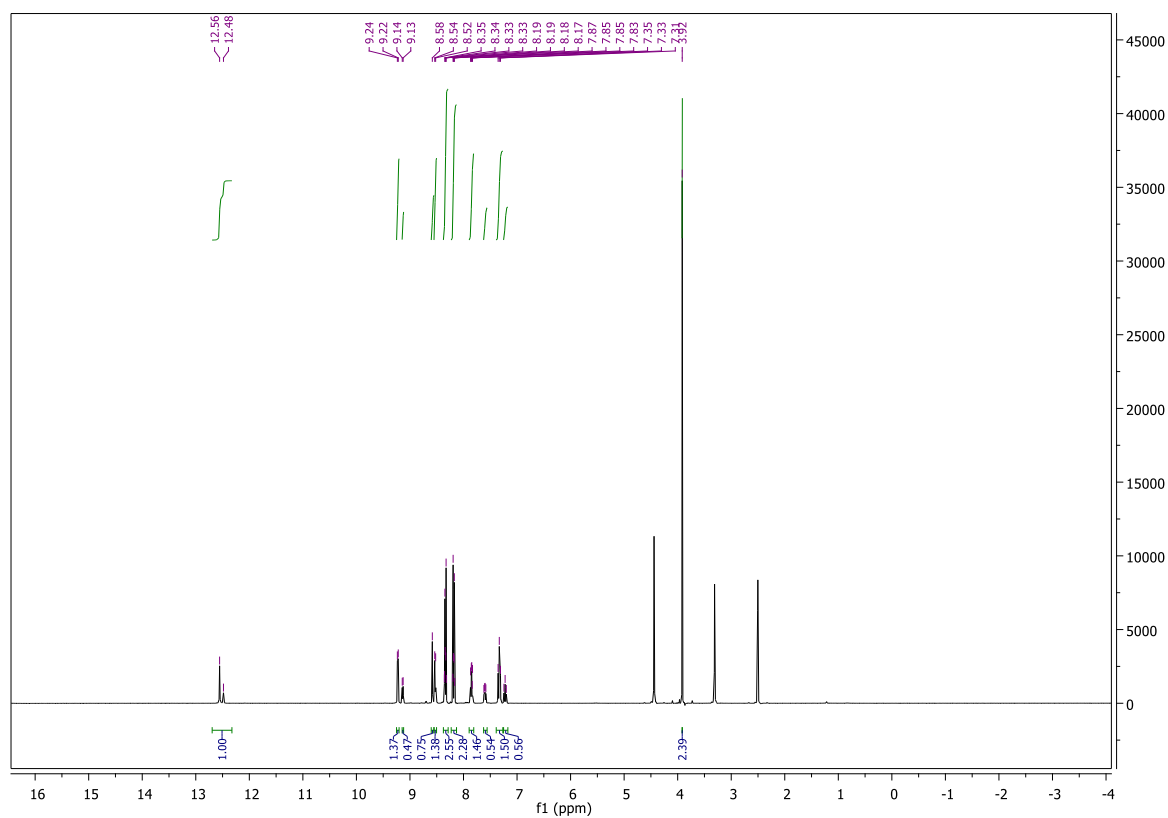

Figure S58. <sup>1</sup>H NMR of Compound 15

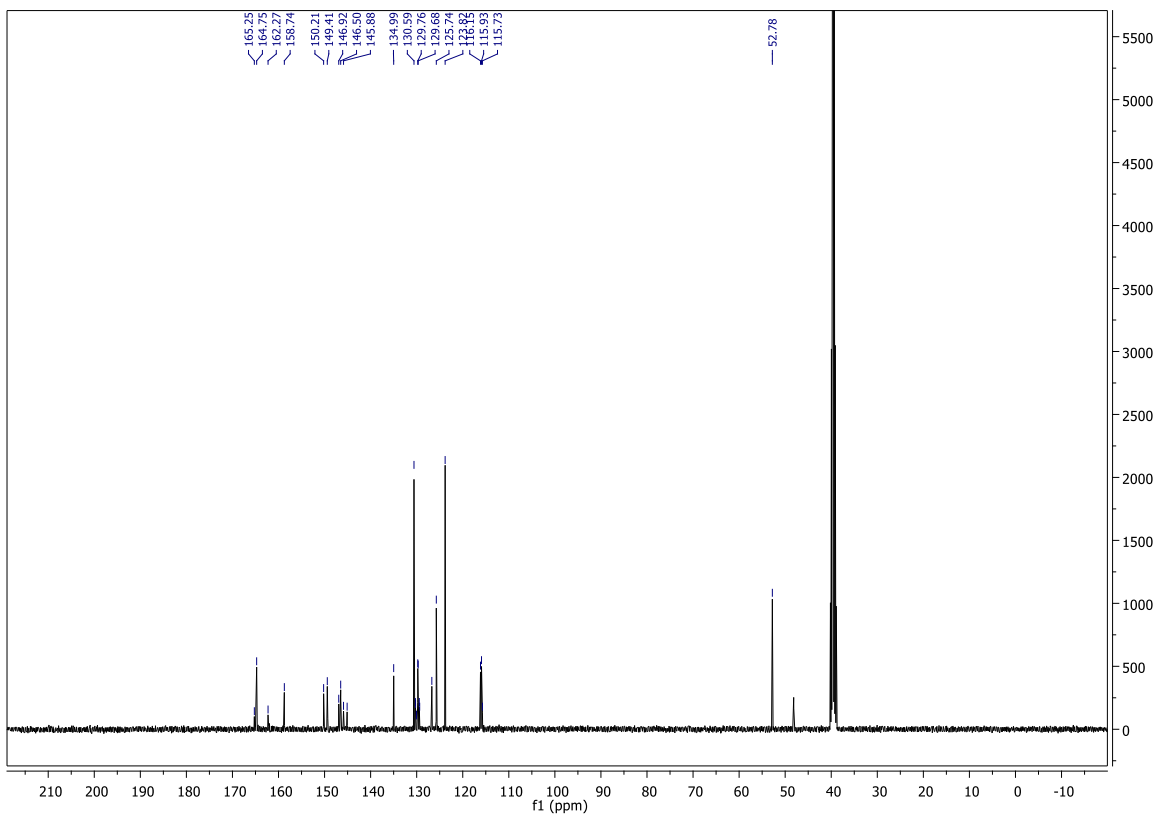

Figure S59.  $^{13}\text{C}$ NMR of Compound 15

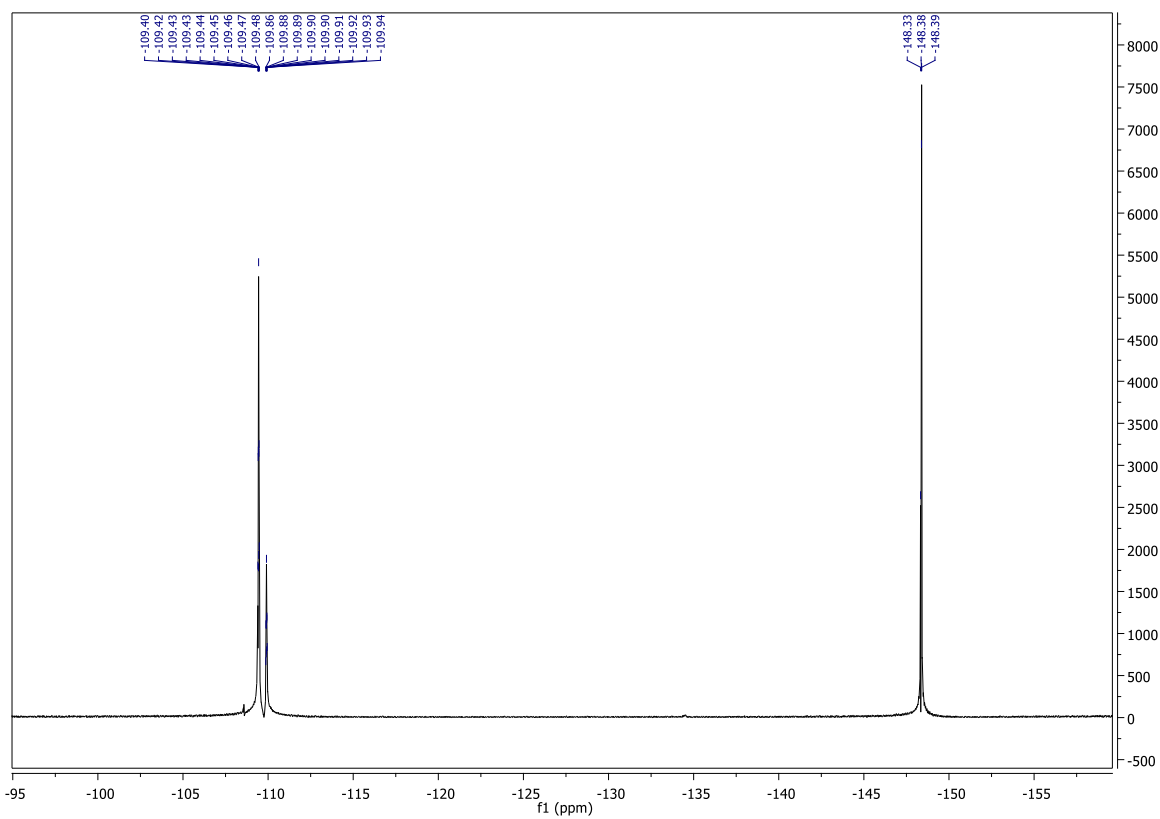

Figure S60.  $^{19}\text{F}$ NMR of Compound 15

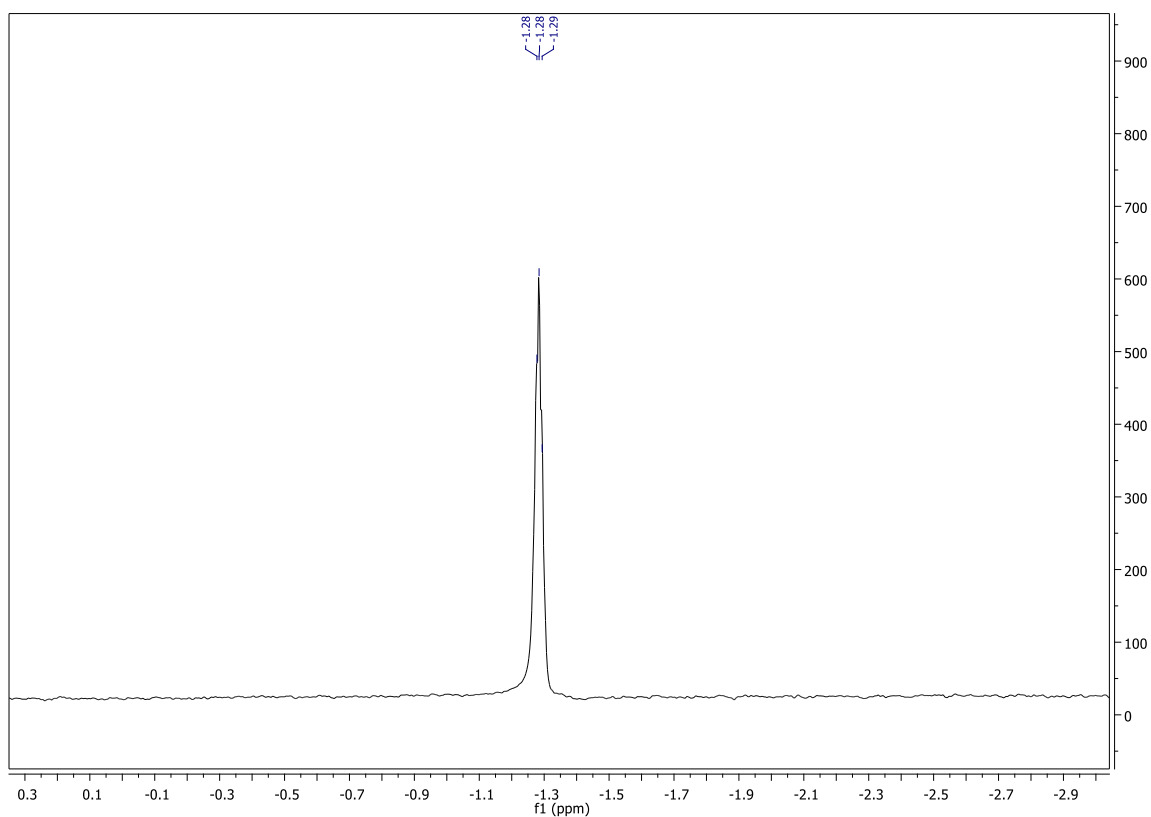

Figure S61.  $^{11}\text{B}$ NMR of Compound 15

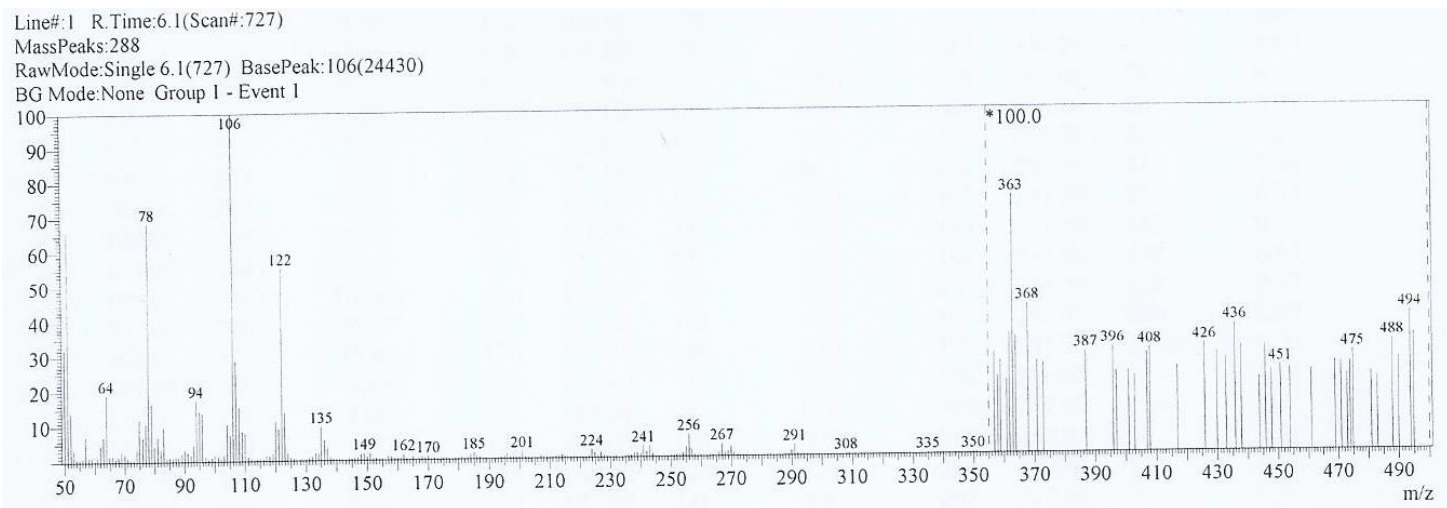

Figure S62. MS (ESI) of Compound 15

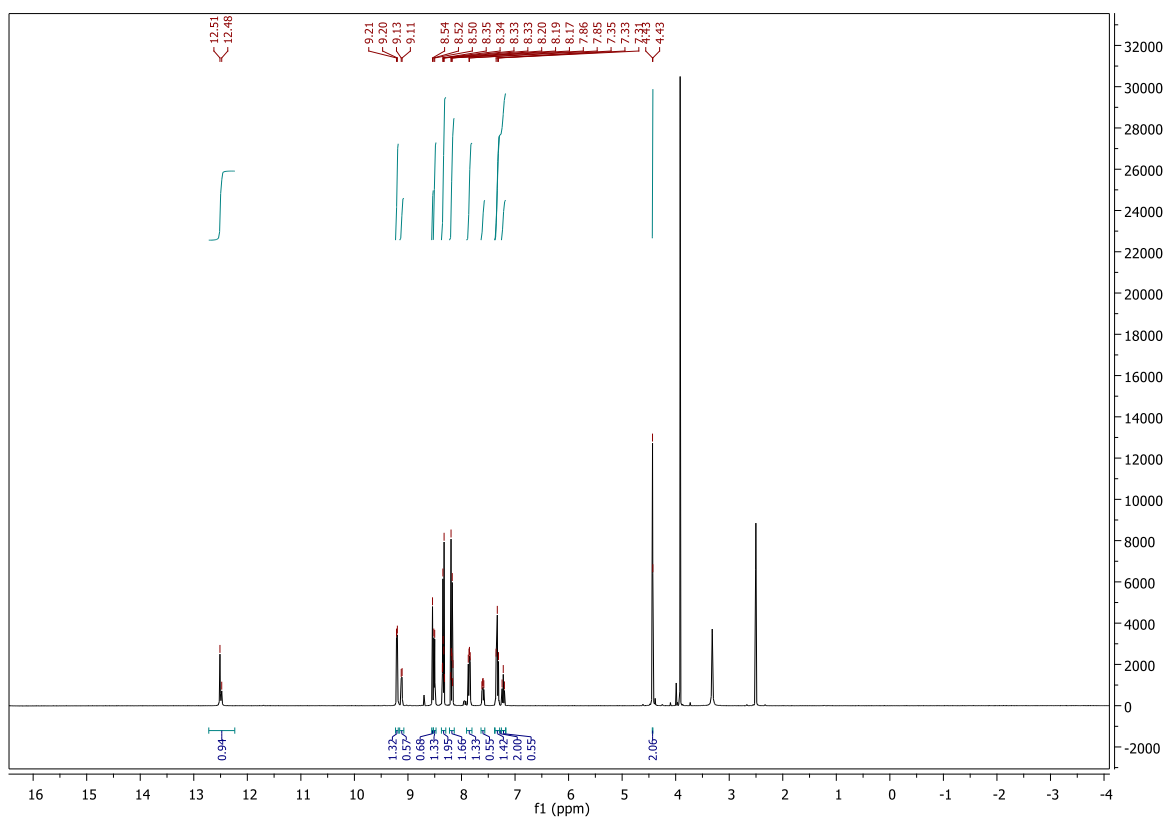

Figure S63.  $^1\text{H}$ NMR of Compound 16

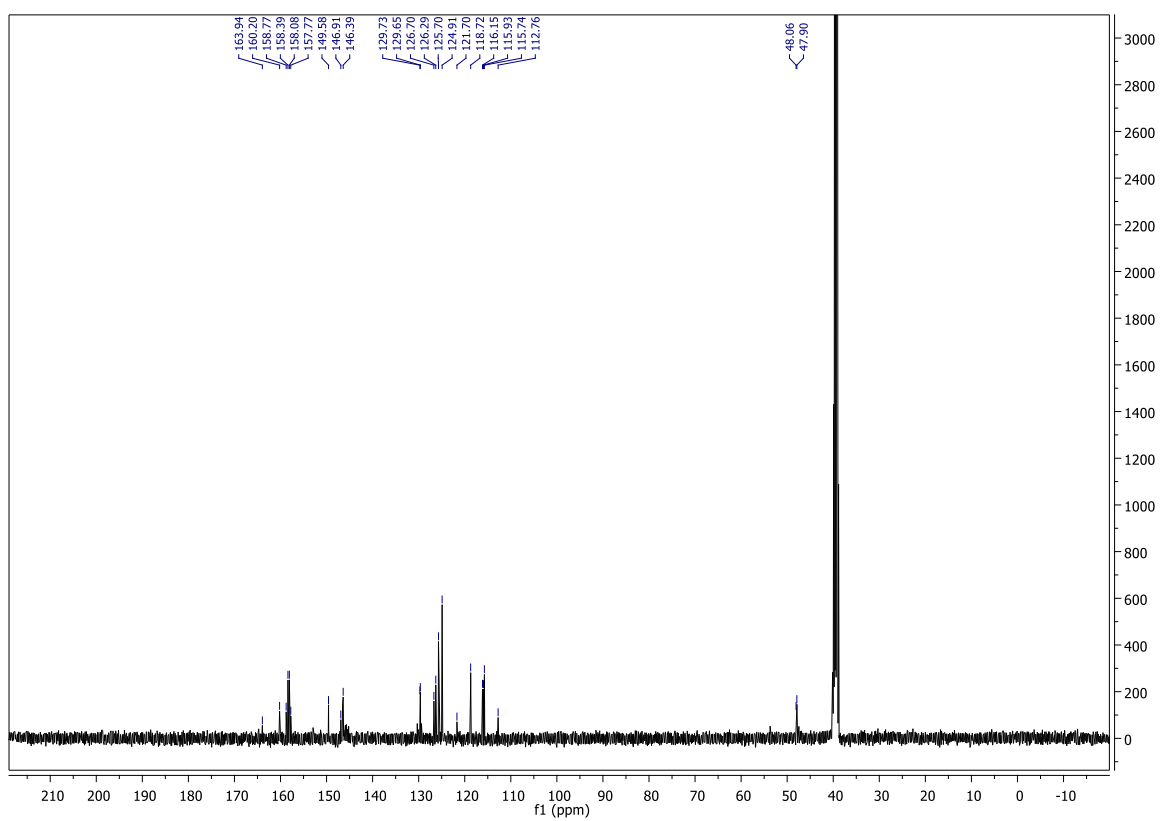

Figure S64.  $^{13}\text{C}$ NMR of Compound 16



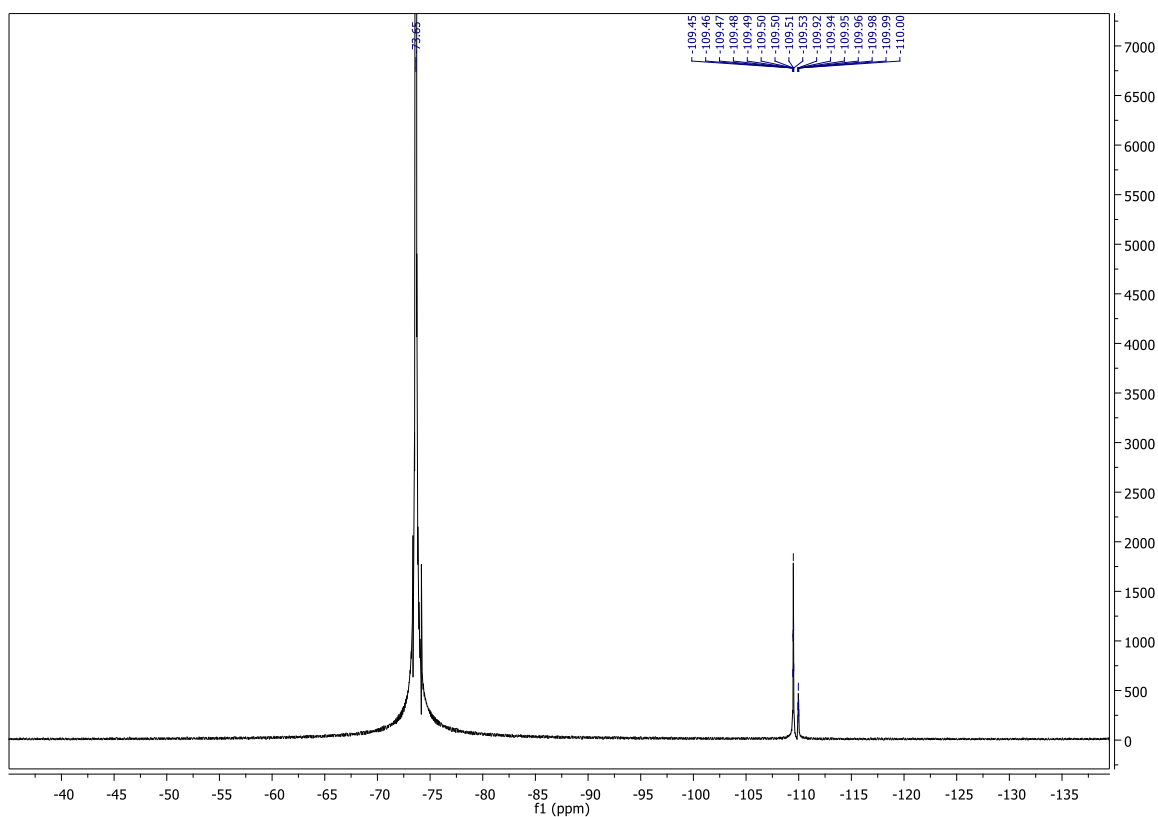

Line#:1 R.Time:5.4(Scan#:652)

MassPeaks:445

RawMode:Single 5.4(652) BasePeak:106(30770)

BG Mode:None Group 1 - Event 1

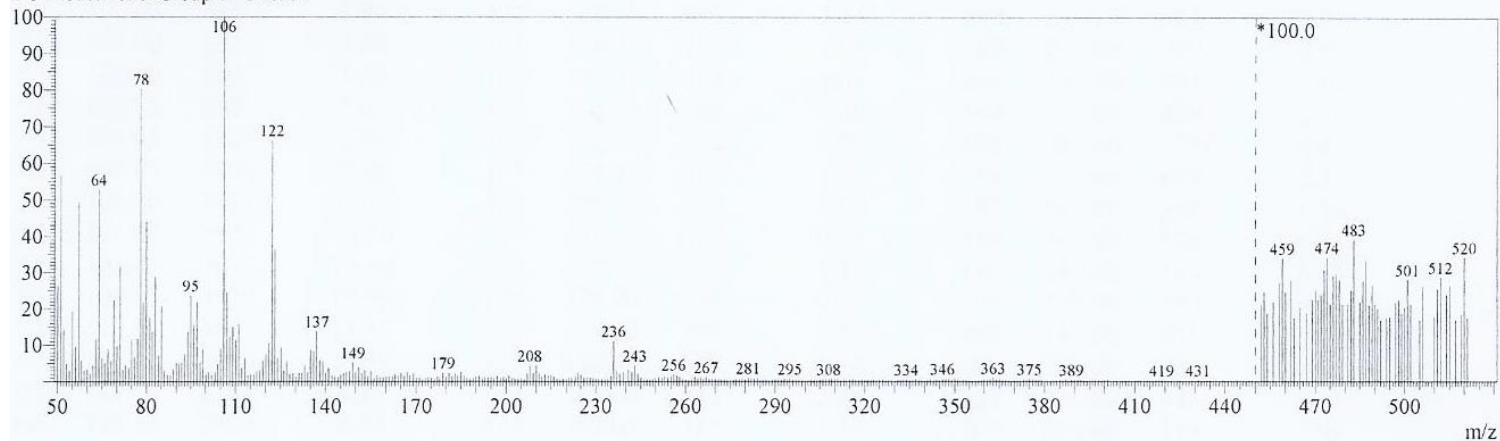

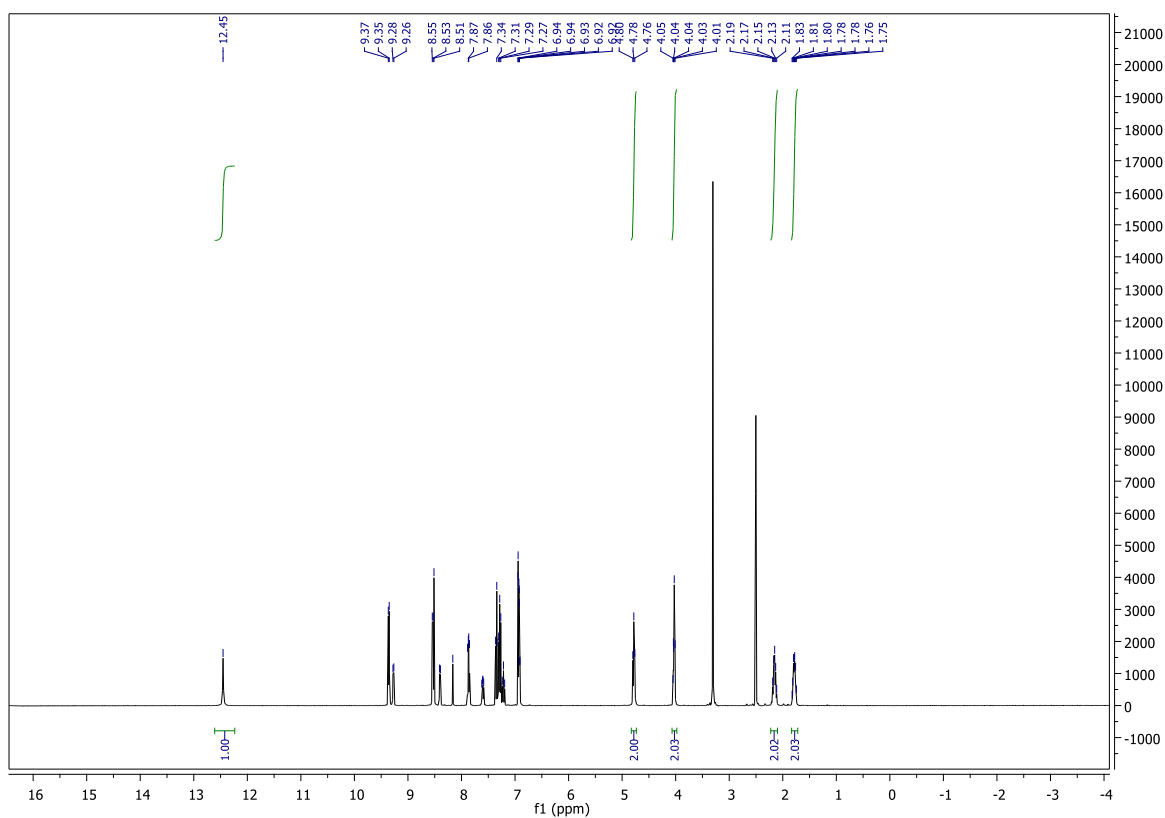

Figure S67. <sup>1</sup>H NMR of Compound 17

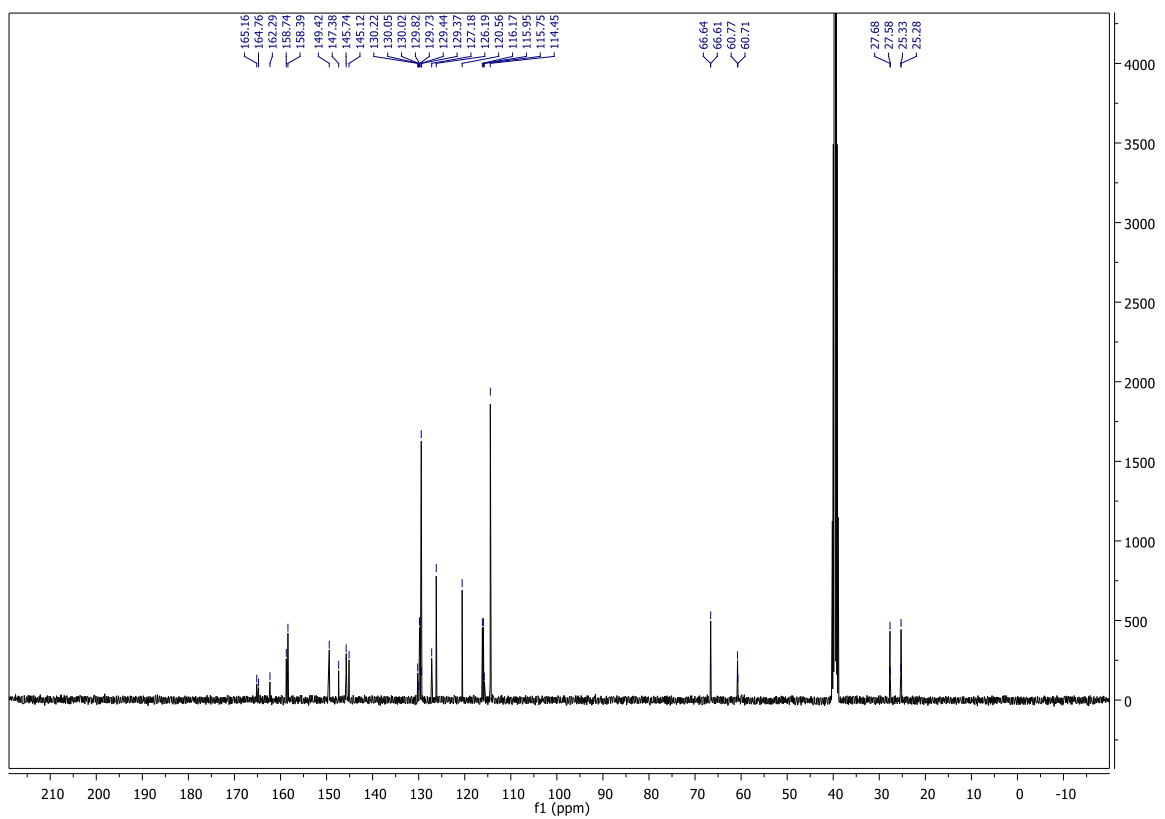

Figure S68. <sup>13</sup>C NMR of Compound 17

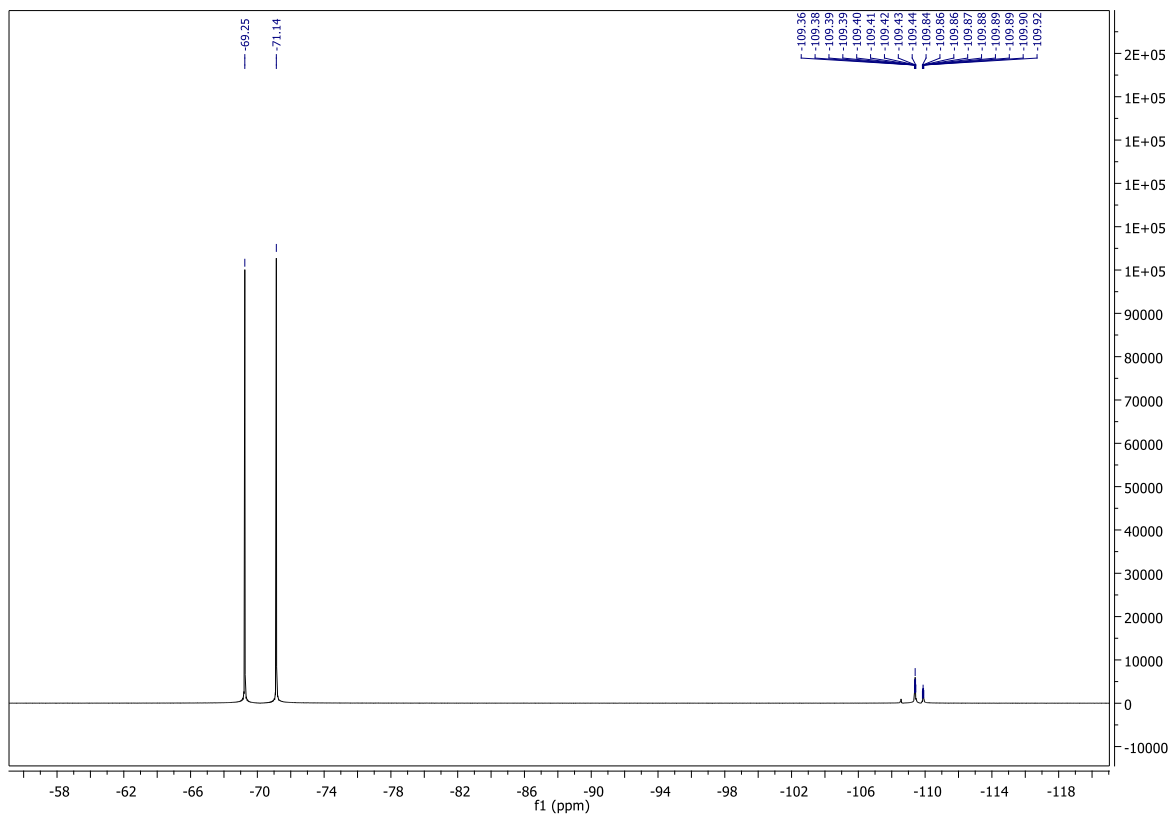

Figure S69.  $^{19}\text{F}$ NMR of Compound 17

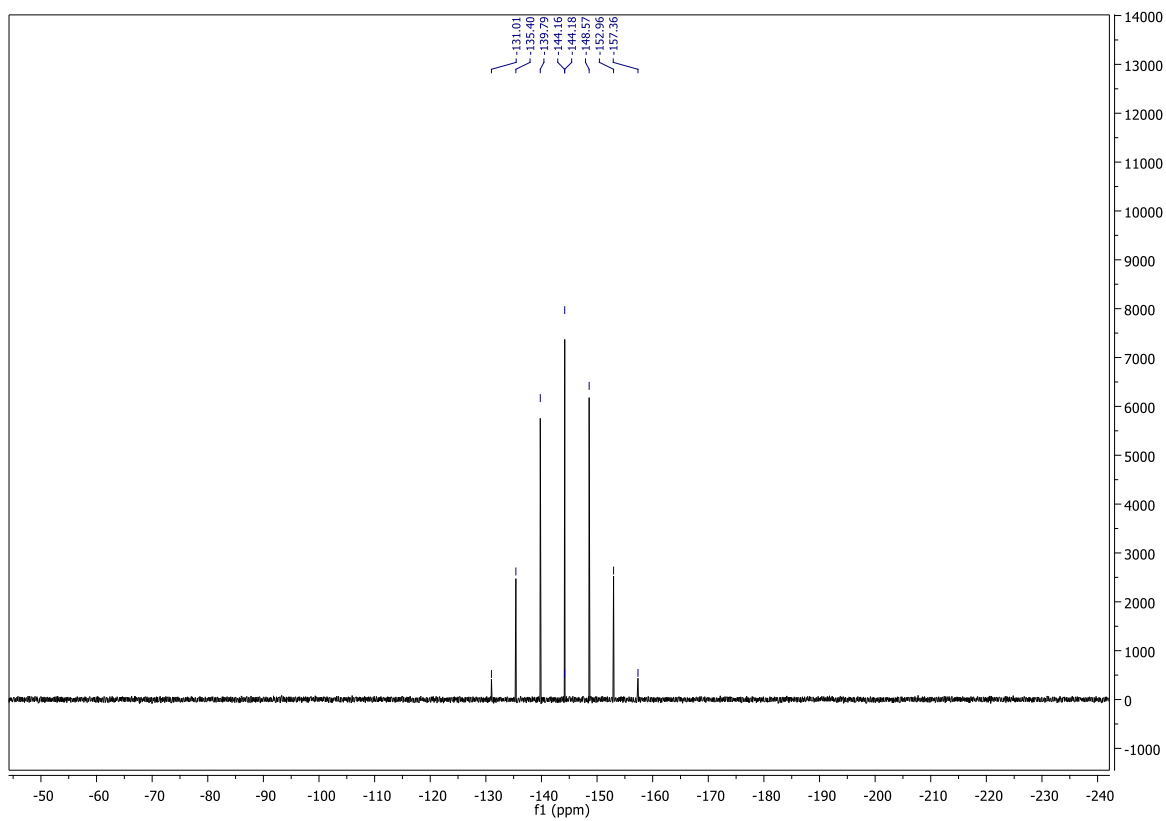

Figure S70.  $^{31}\text{P}$ NMR of Compound 17

Line#:1 R.Time:5.1(Scan#:617)  
MassPeaks:447  
RawMode:Single 5.1(617) BasePeak:106(160343)  
BG Mode:None Group 1 - Event 1

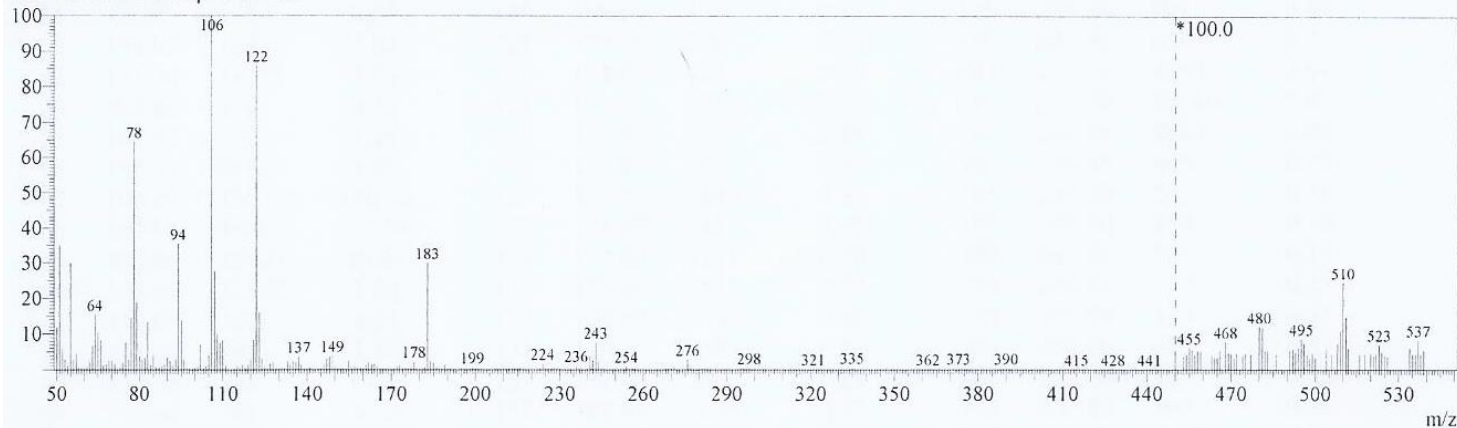

Figure S71. MS (ESI) of Compound 17

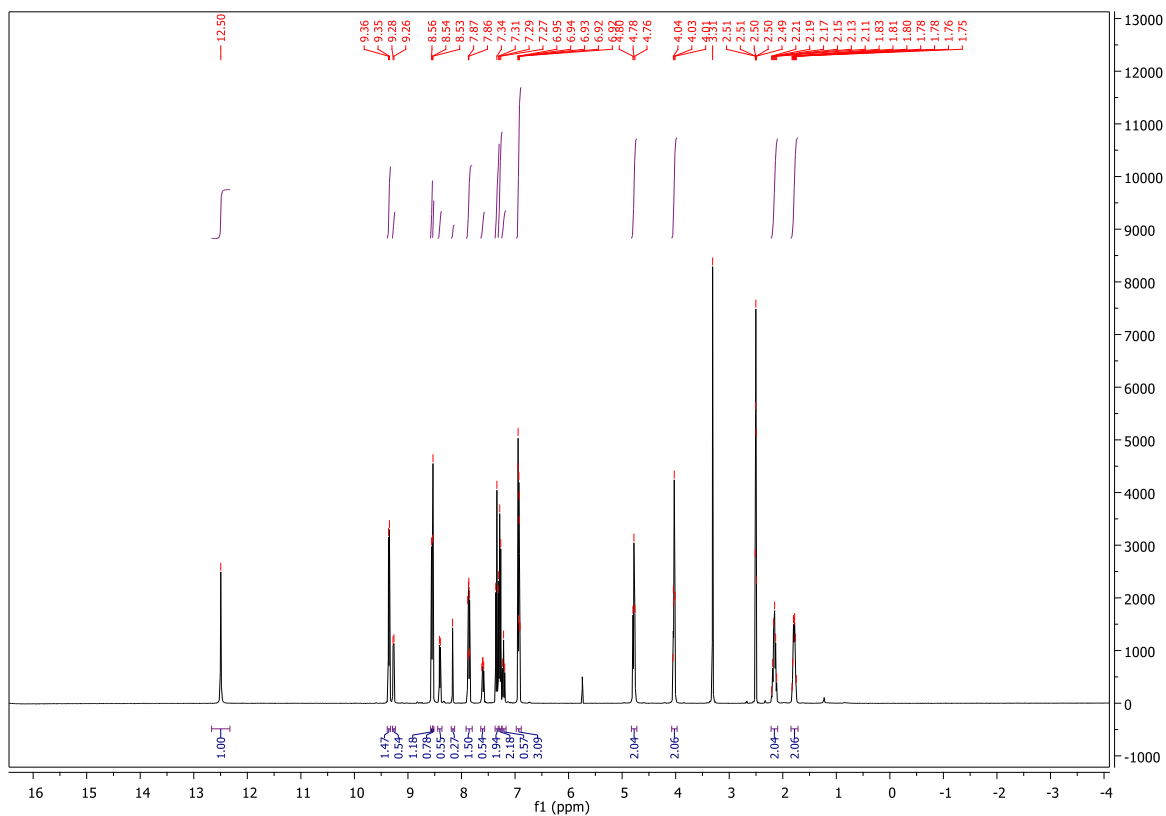

Figure S72. <sup>1</sup>H NMR of Compound 18

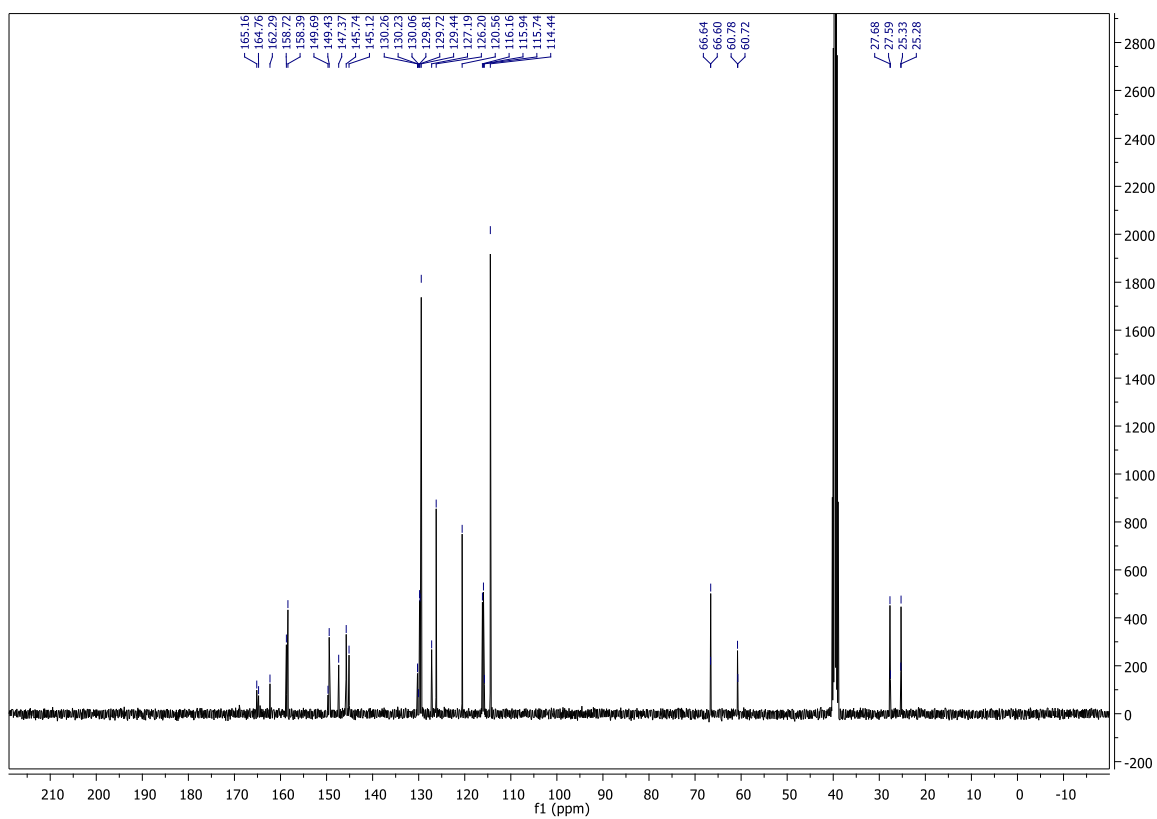

Figure S73.  $^{13}\text{C}$ NMR of Compound 18

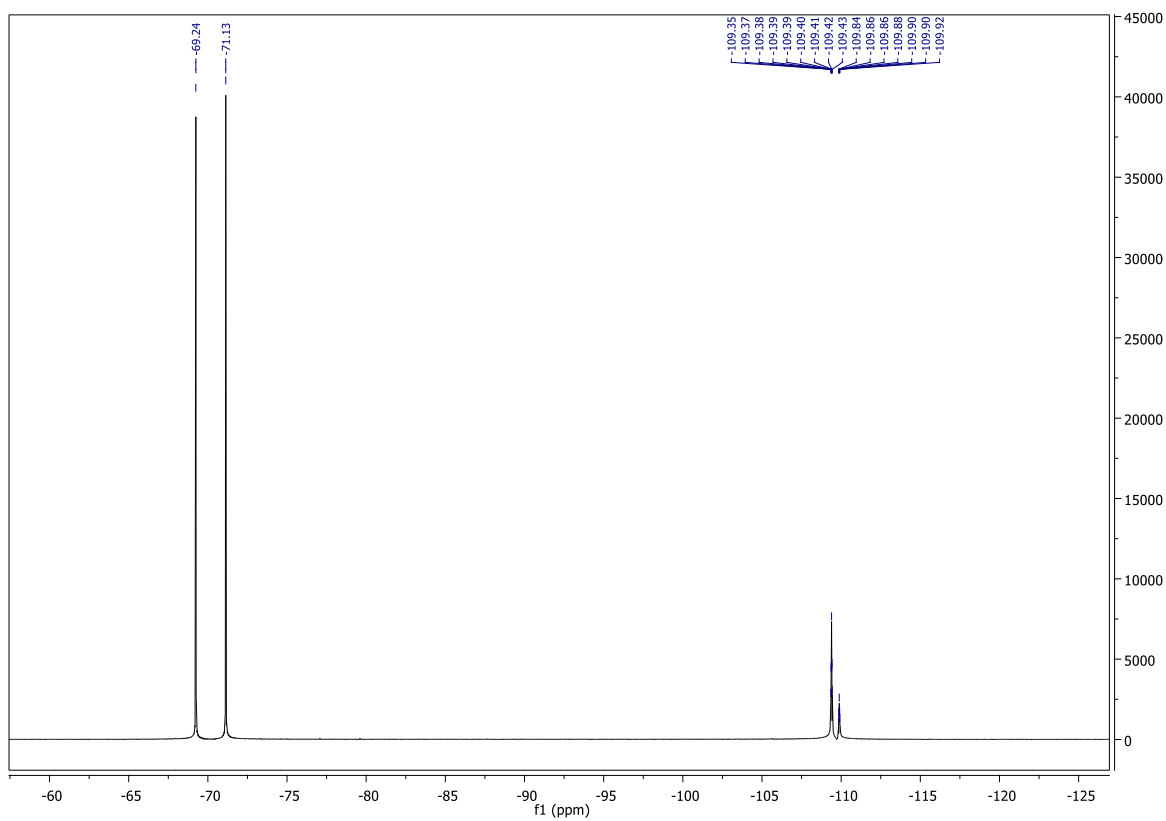

Figure S74.  $^{19}\text{F}$ NMR of Compound 18

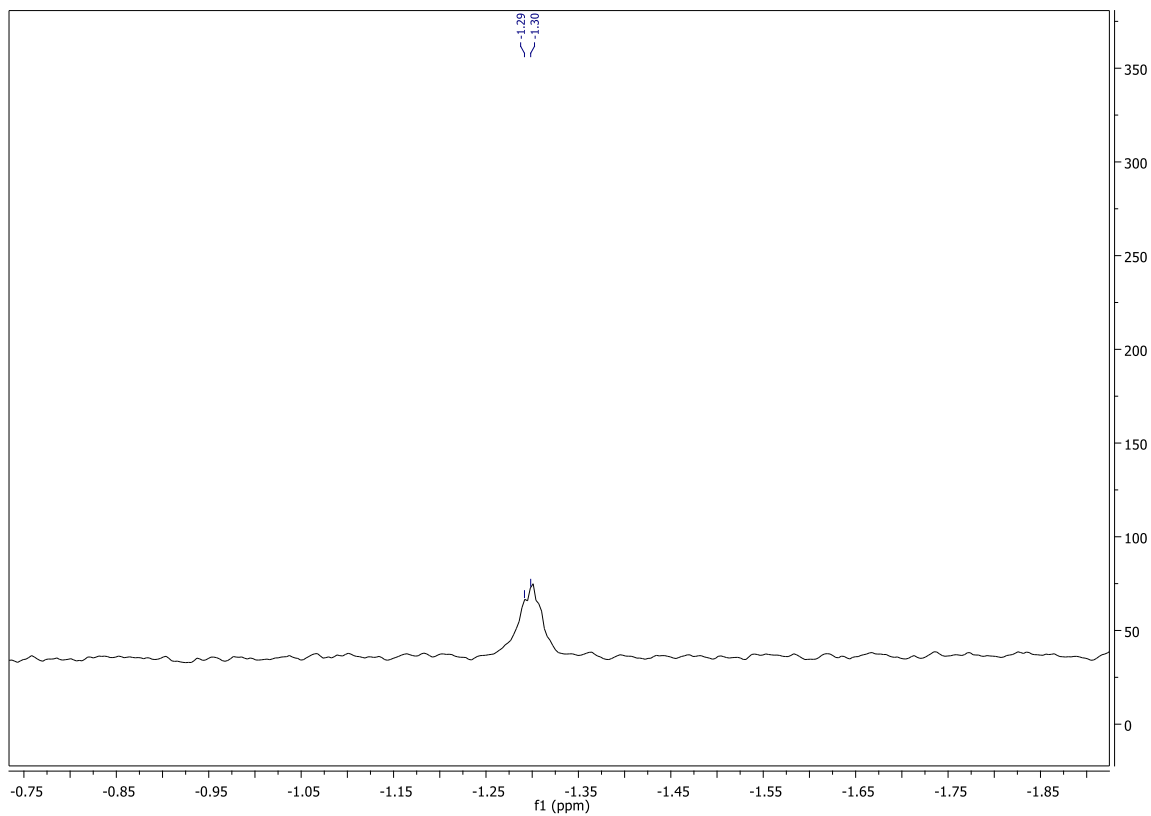

Figure S75.  $^{11}\text{B}$ NMR of Compound 18

Line#:1 R.Time:5.2(Scan#:629)

MassPeaks:388

RawMode:Single 5.2(629) BasePeak:106(101711)

BG Mode:None Group 1 - Event 1

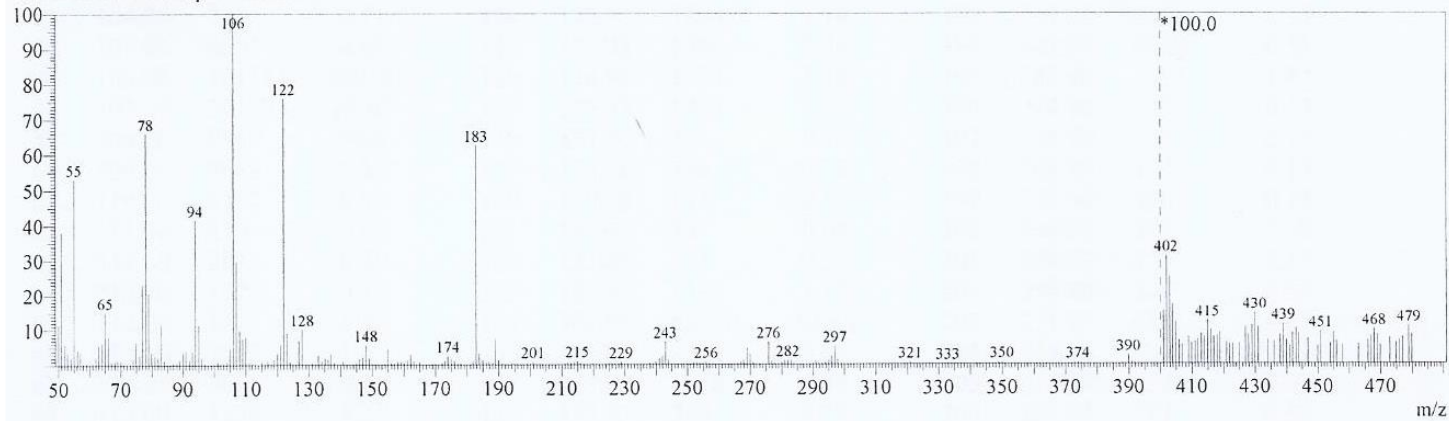

Figure S76. MS (ESI) of Compound 18

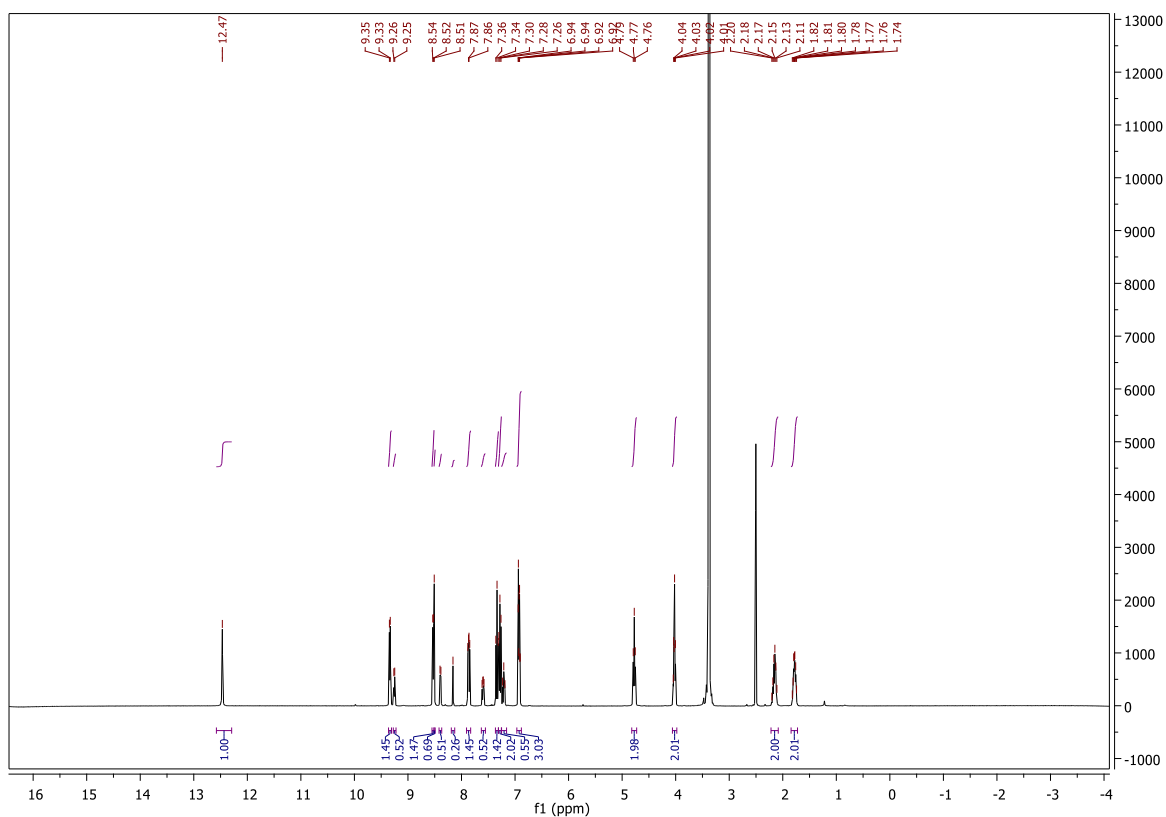

Figure S77. <sup>1</sup>H NMR of Compound 19

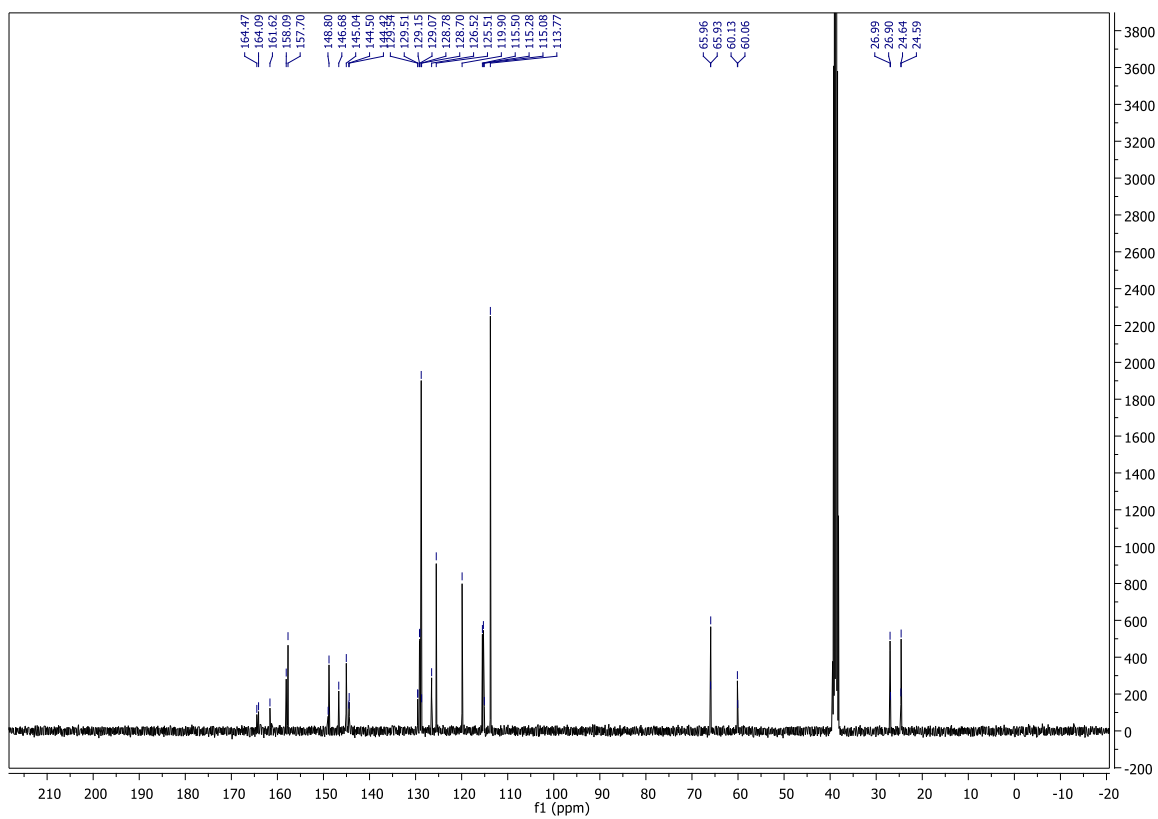

Figure S78. <sup>13</sup>C NMR of Compound 19

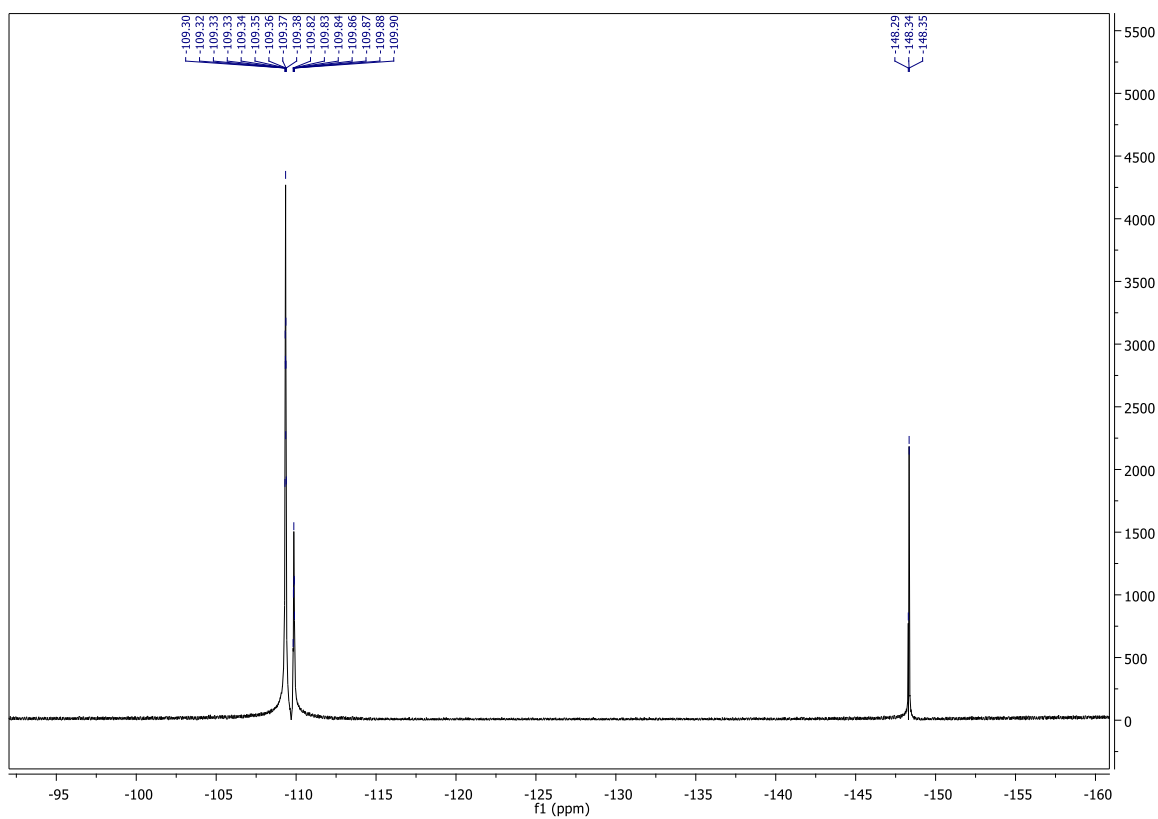

Line#: 1 R.Time: 1.9(Scan#: 228)  
 MassPeaks: 439  
 RawMode: Single 1.9(228) BasePeak: 57(25829)  
 BG Mode: None Group 1 - Event 1

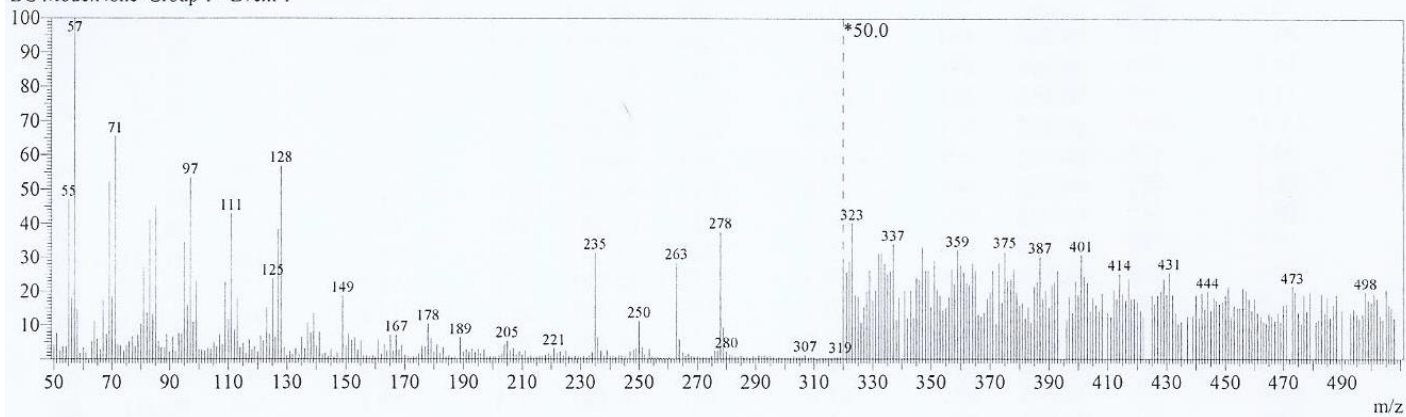



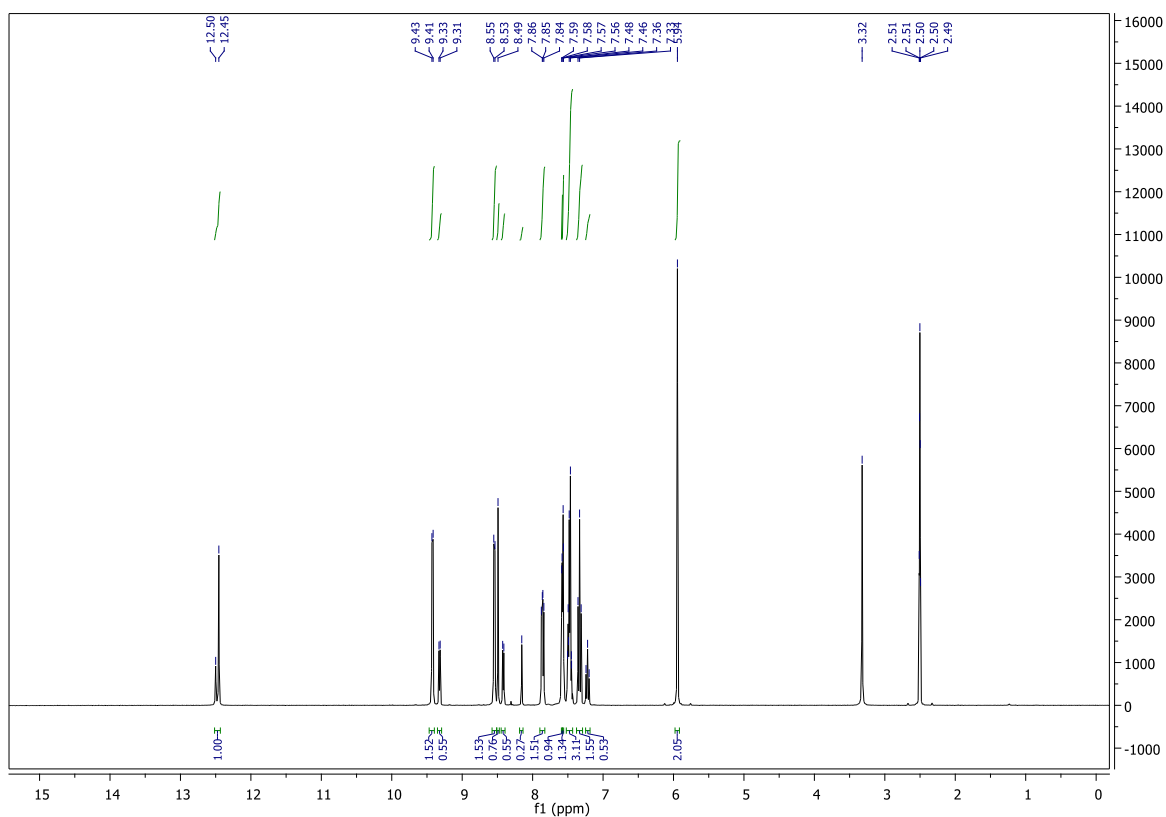

Figure S81. <sup>1</sup>H NMR of Compound 20

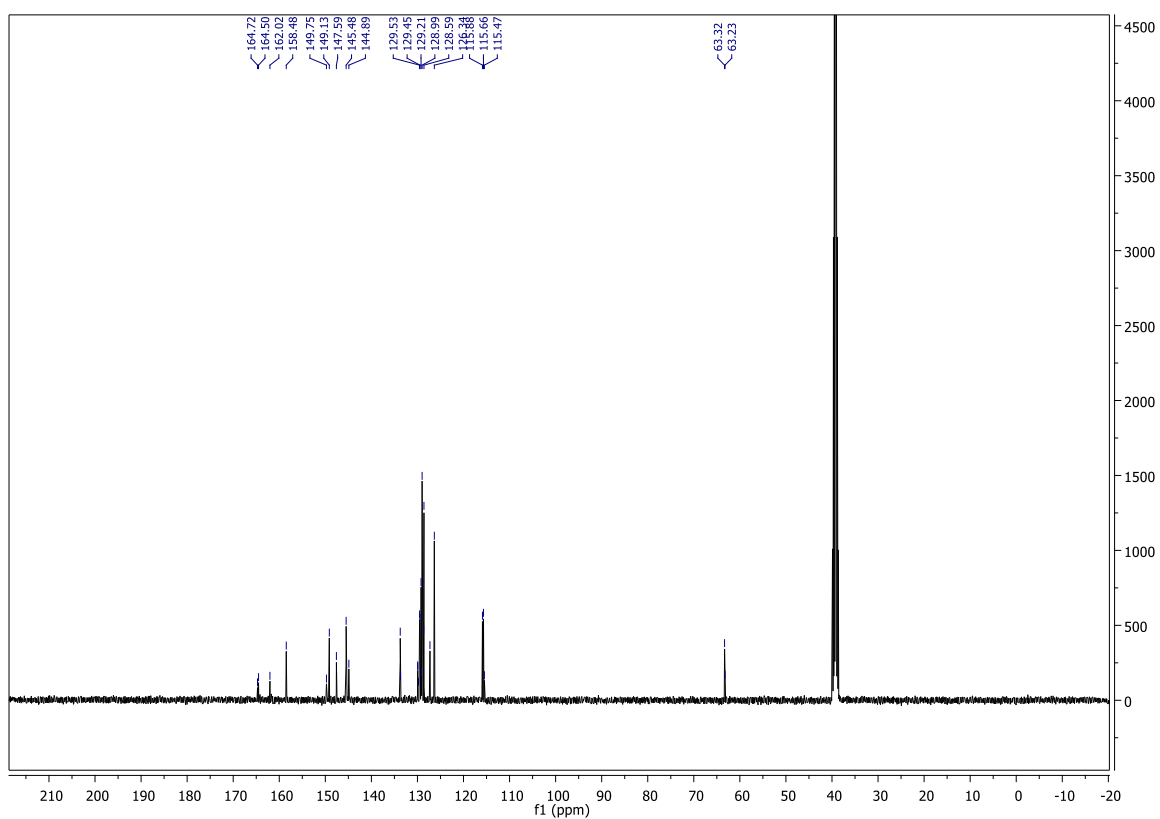

Figure S82. <sup>13</sup>C NMR of Compound 20

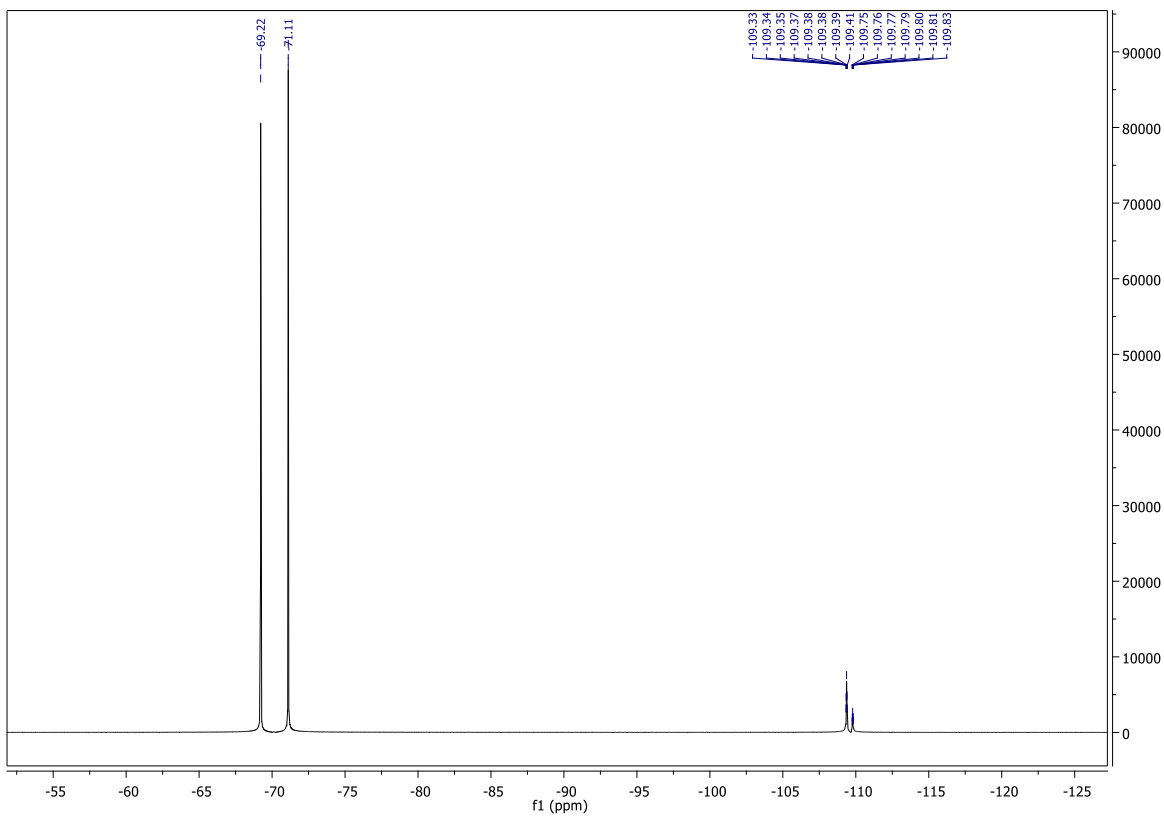

Figure S83.  $^{19}\text{F}$ NMR of Compound 20

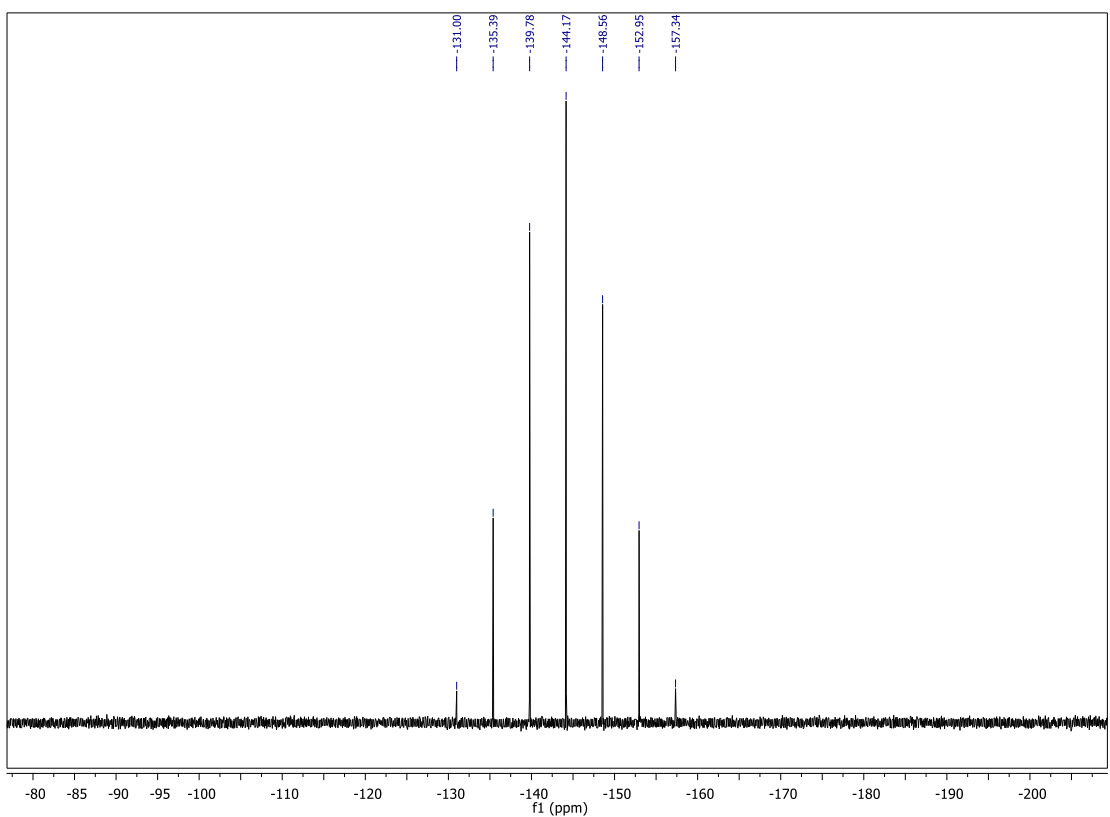

Figure S84.  $^{31}\text{P}$ NMR of Compound 20

Line#:1 R.Time:6.8(Scan#:814)

MassPeaks:347

RawMode:Single 6.8(814) BasePeak:51(16604)

BG Mode:None Group 1 - Event 1

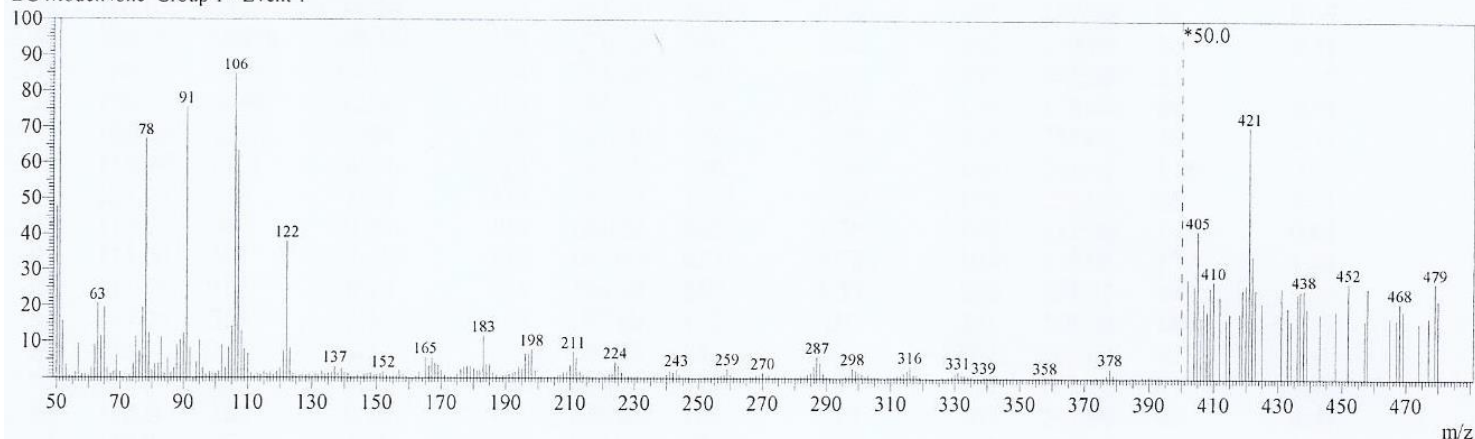

Figure S85. MS (ESI) of Compound 20

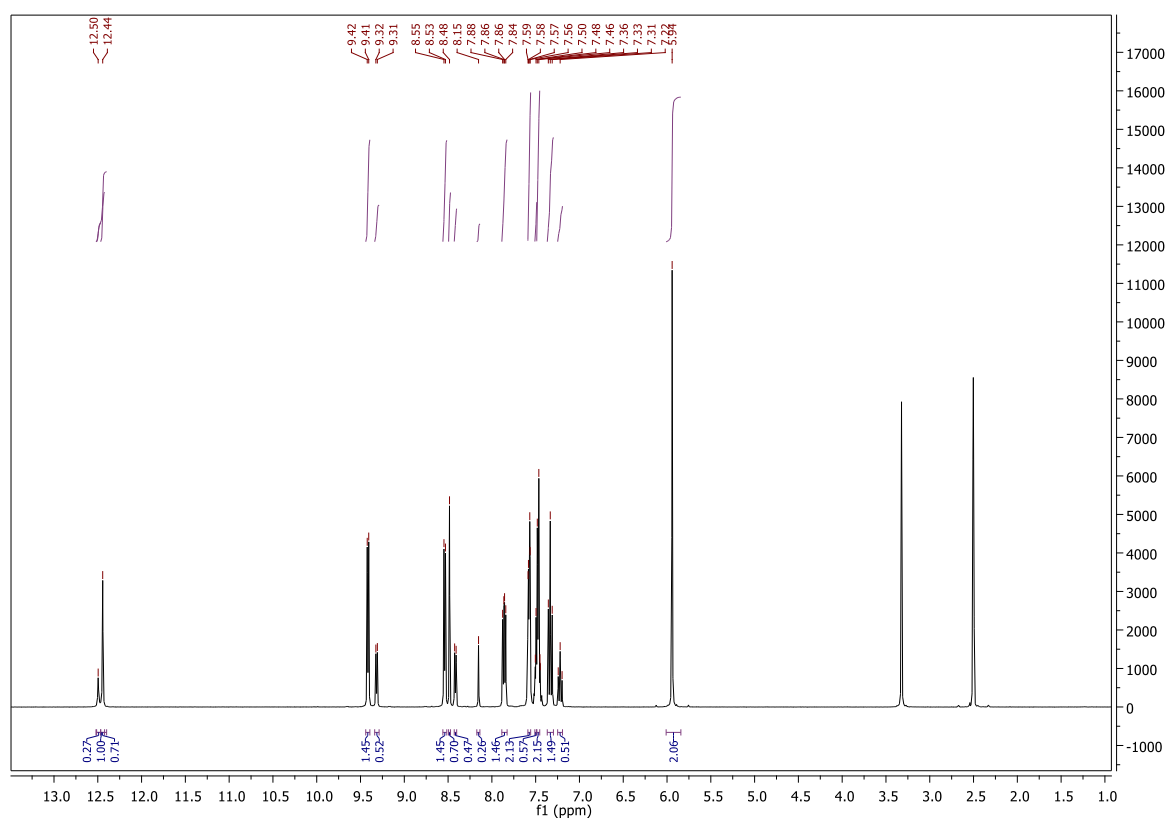

Figure S86.  $^1\text{H}$ NMR of Compound 21

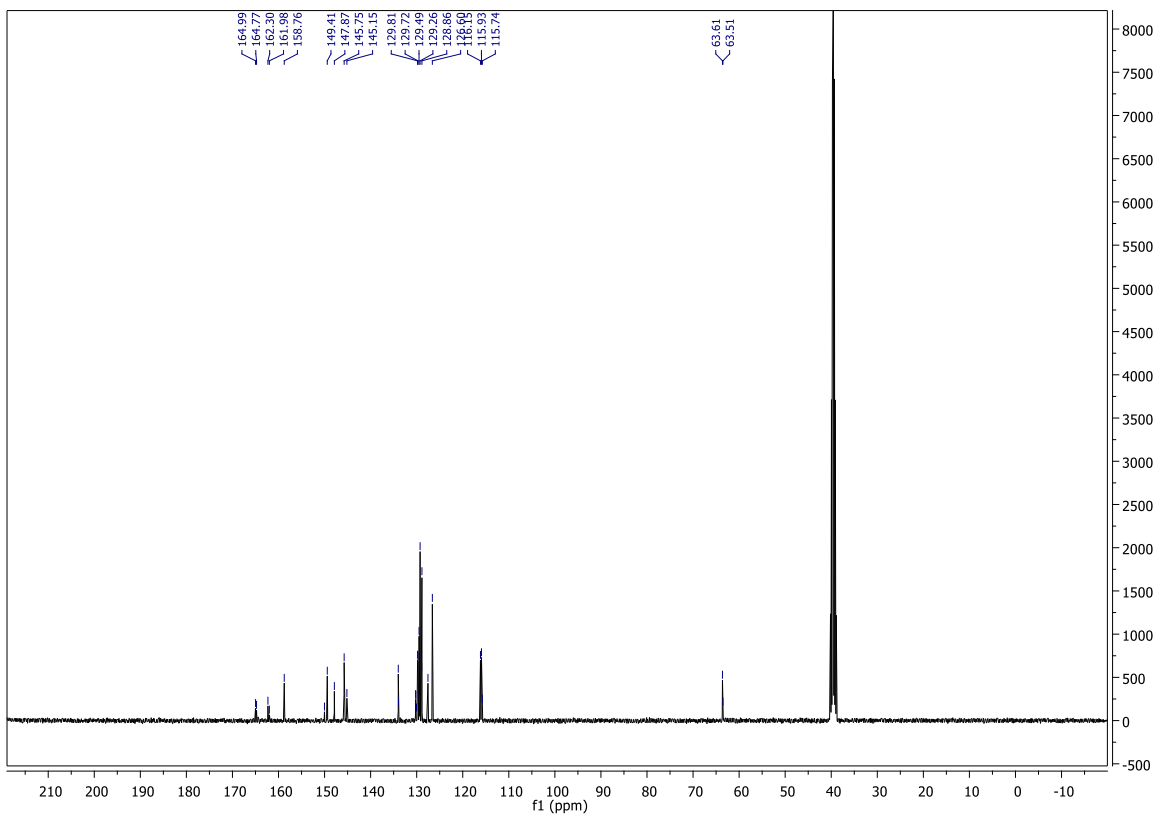

Figure S87. <sup>13</sup>CNMR of Compound 21

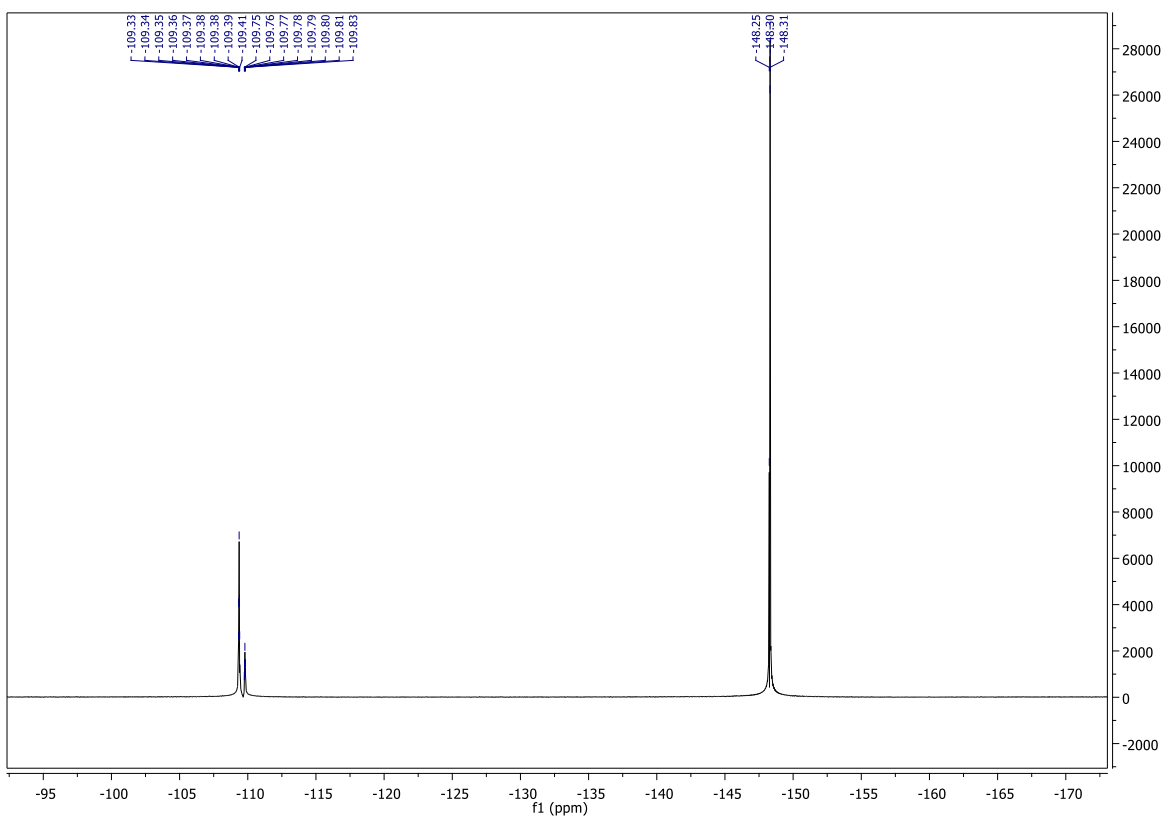

Figure S88. <sup>19</sup>FNMR of Compound 21

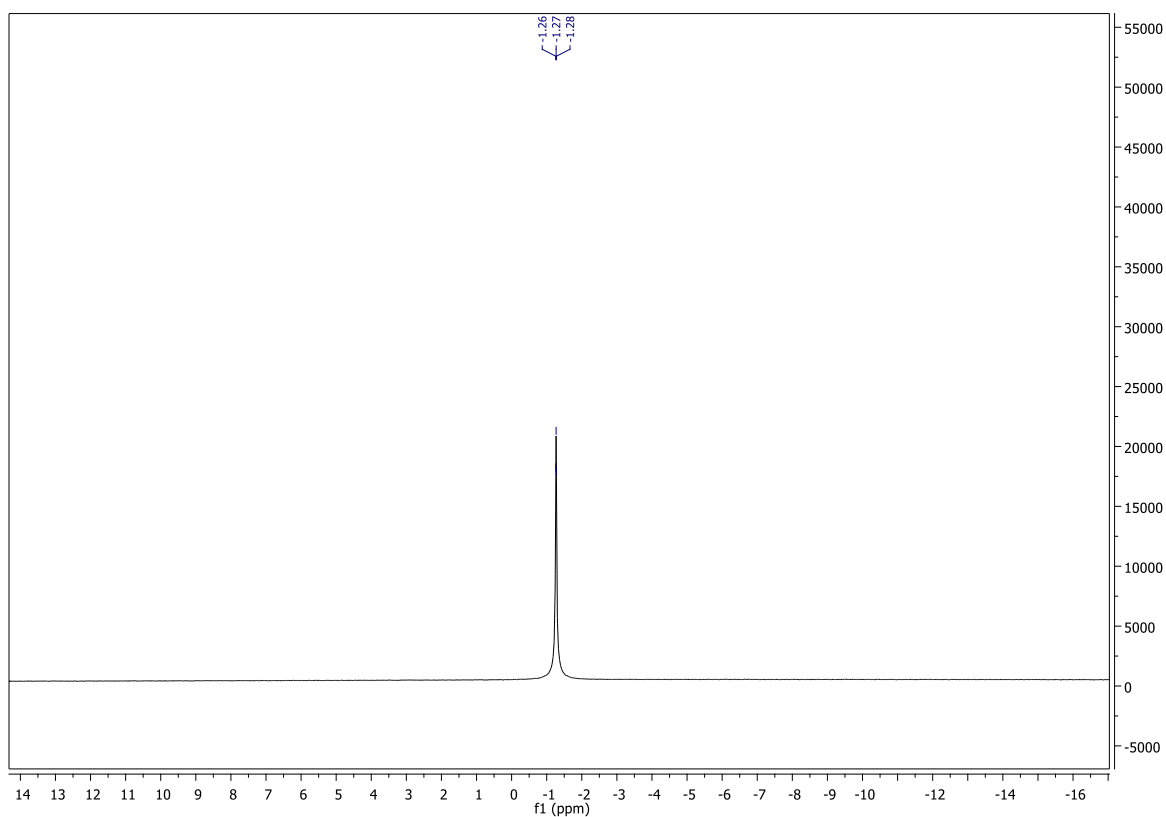

Figure S89.  $^{11}\text{B}$ NMR of Compound 21

Line#:1 R.Time:5.3(Scan#:636)

MassPeaks:323

RawMode:Single 5.3(636) BasePeak:106(17508)

BG Mode:None Group 1 - Event 1

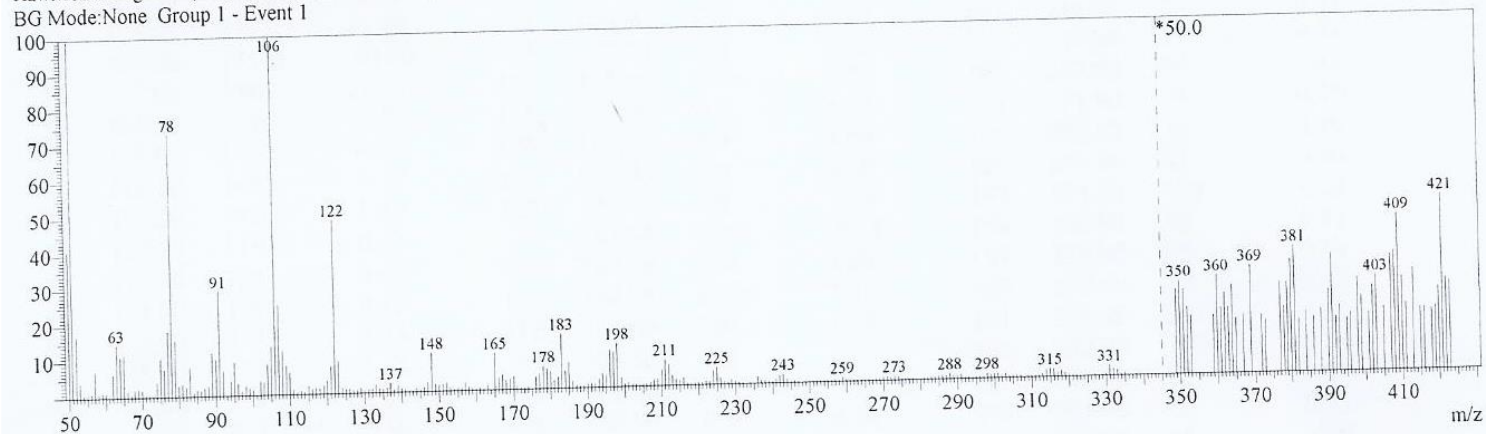

Figure S90. MS (ESI) of Compound 21

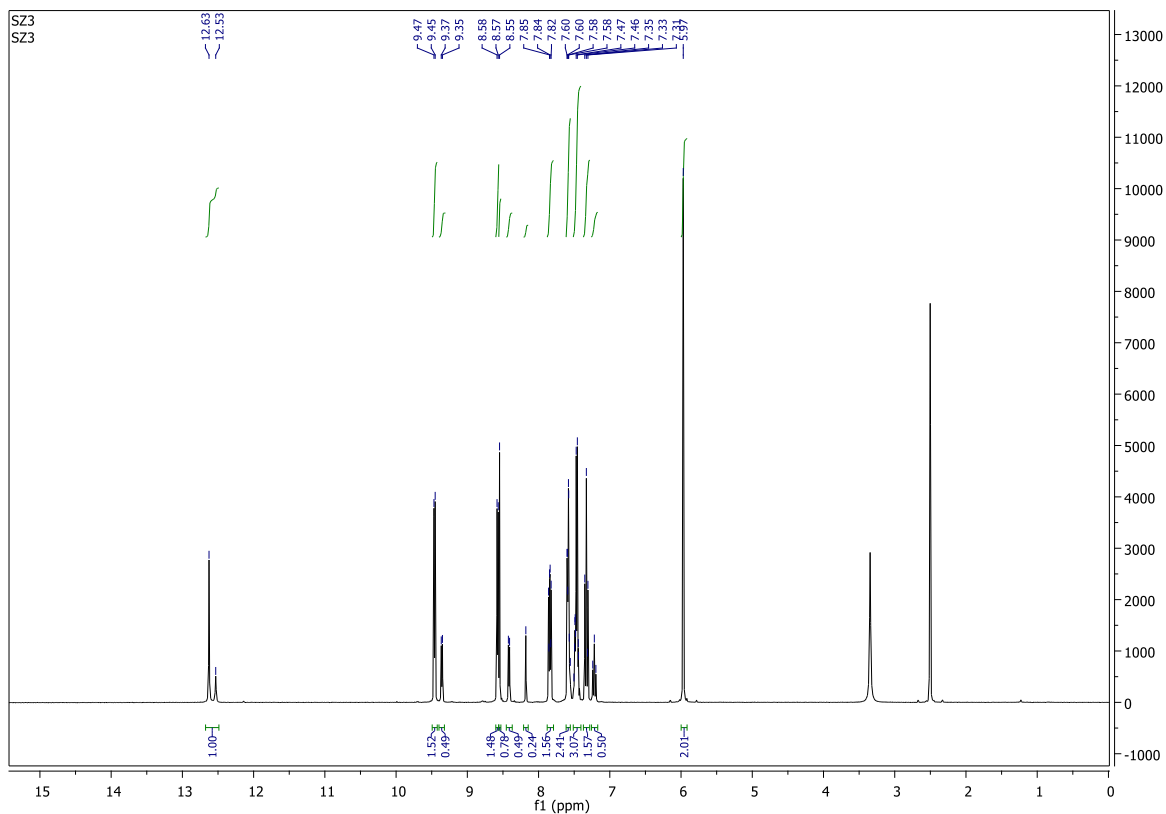

Figure S91.  $^1\text{H}$ NMR of Compound 22

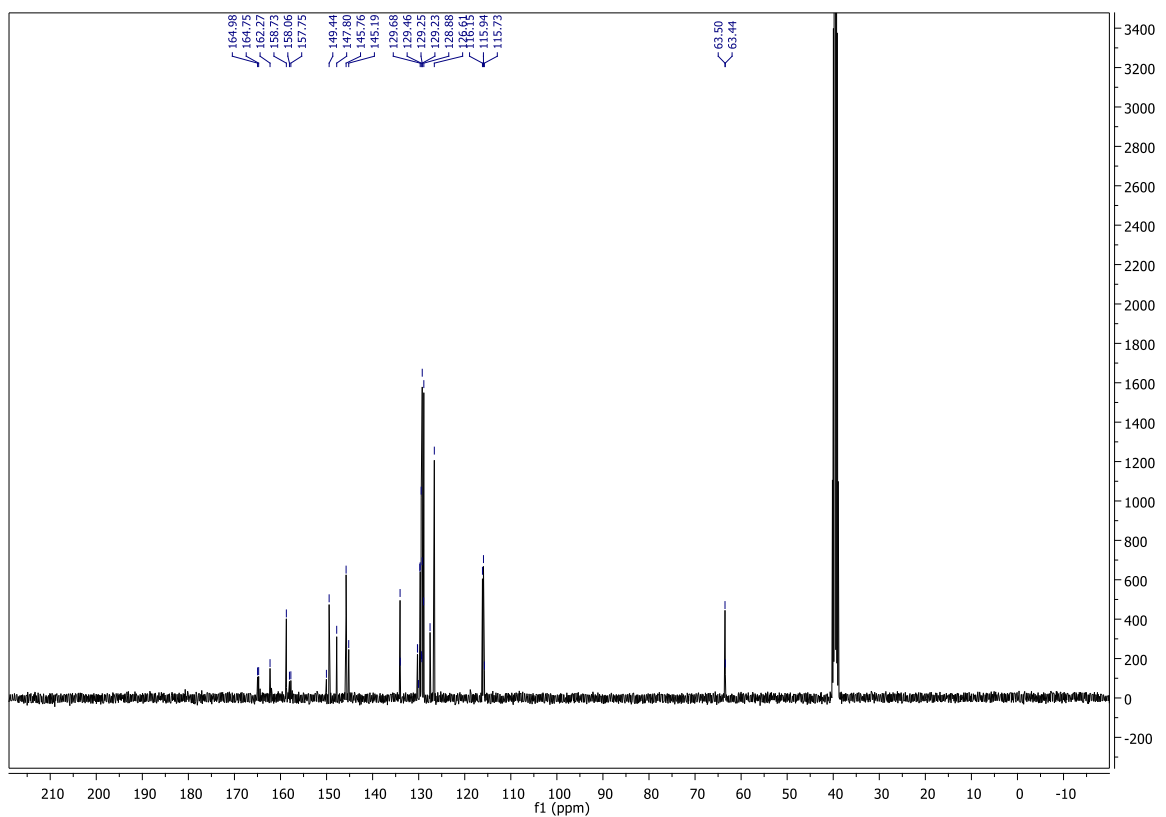

Figure S92.  $^{13}\text{C}$ NMR of Compound 22

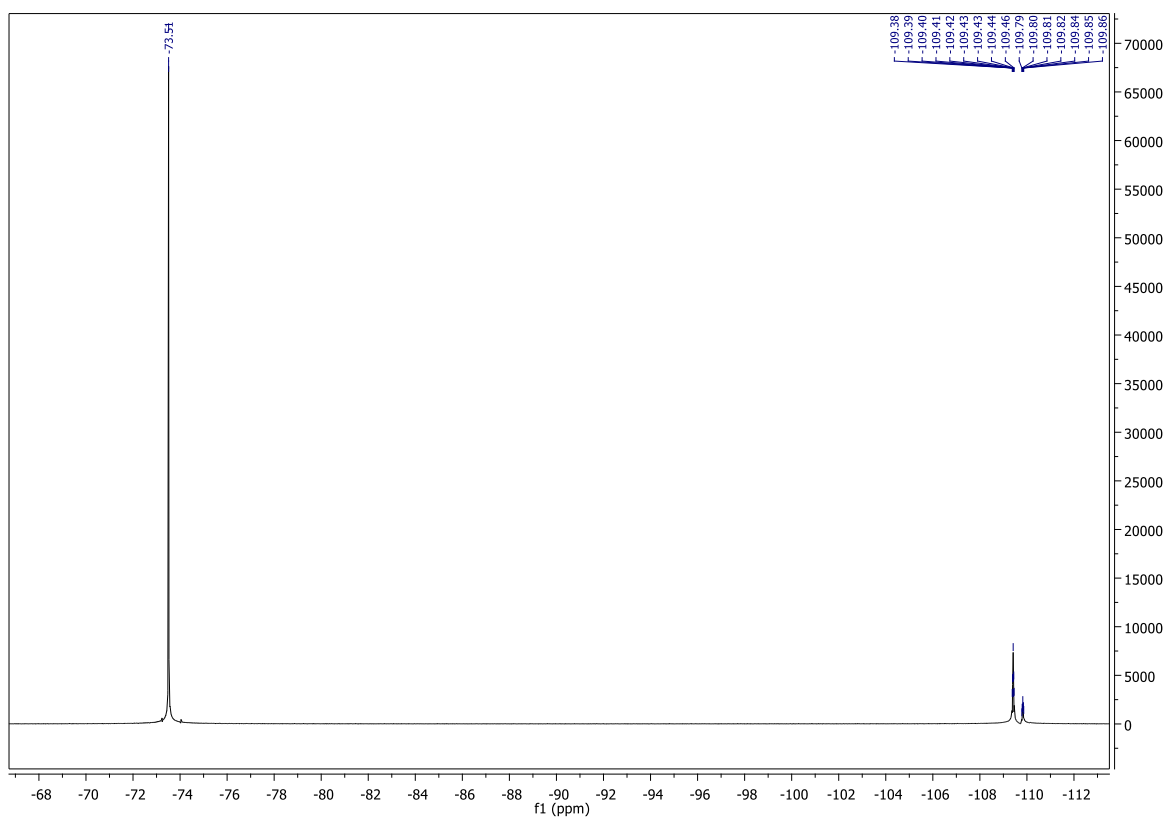

Line#:1 R.Time:4.8(Scan#:581)  
 MassPeaks:308  
 RawMode:Single 4.8(581) BasePeak:106(18532)  
 BG Mode:None Group 1 - Event 1

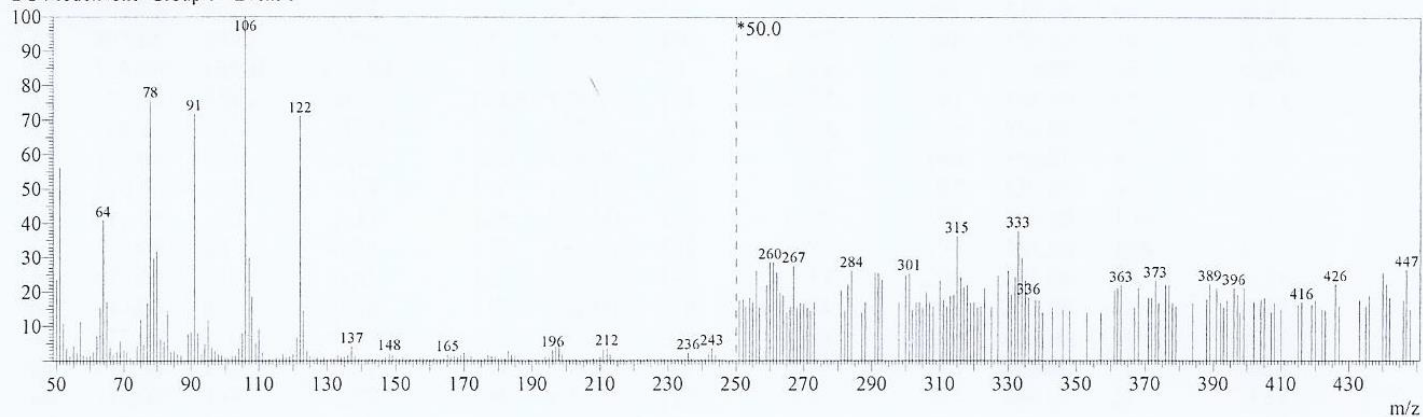

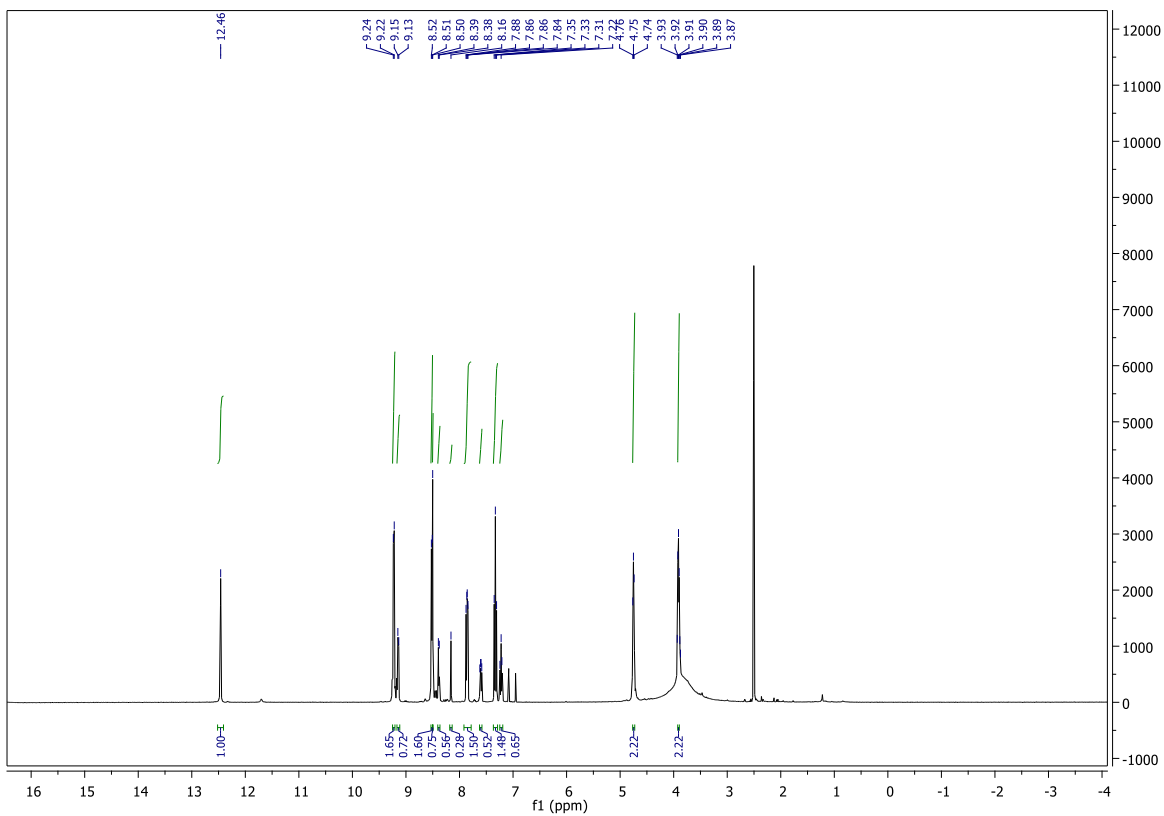

Figure S95.  $^1\text{H}$ NMR of Compound 23

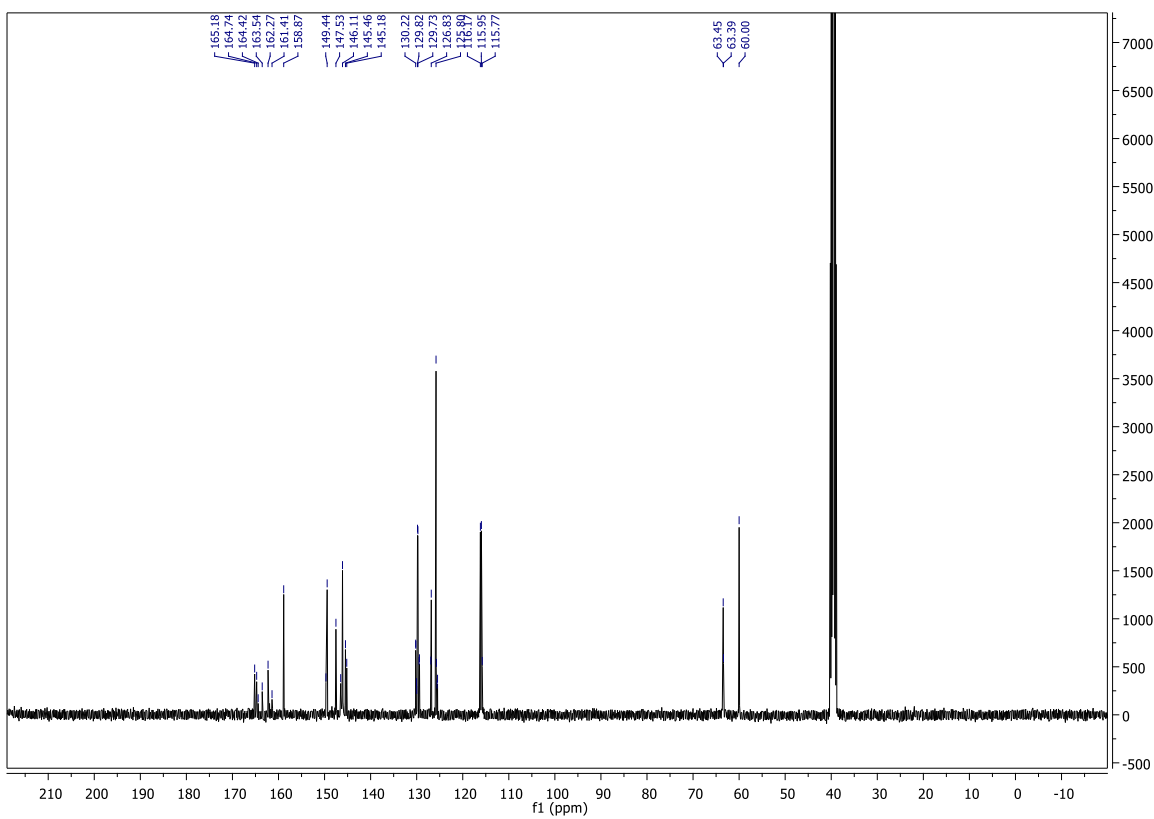

Figure S96.  $^{13}\text{C}$ NMR of Compound 23



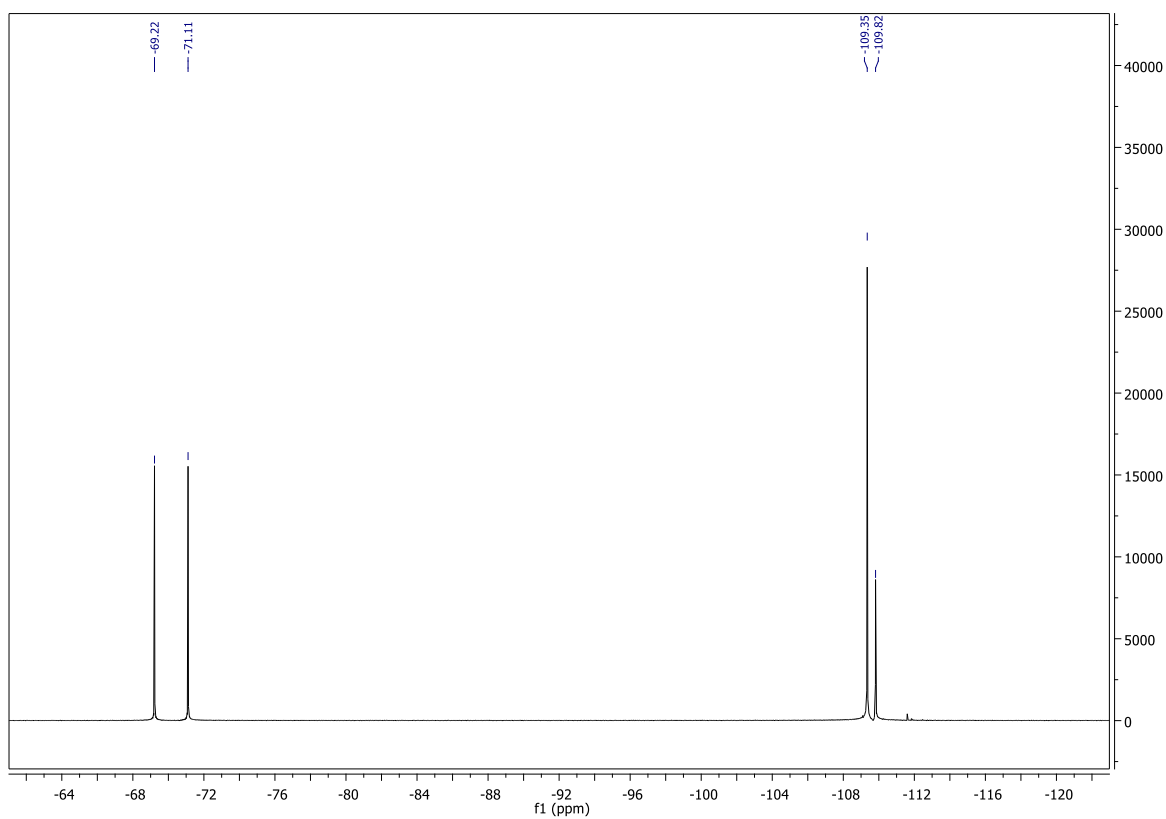

Figure S97.  $^{19}\text{F}$ NMR of Compound 23

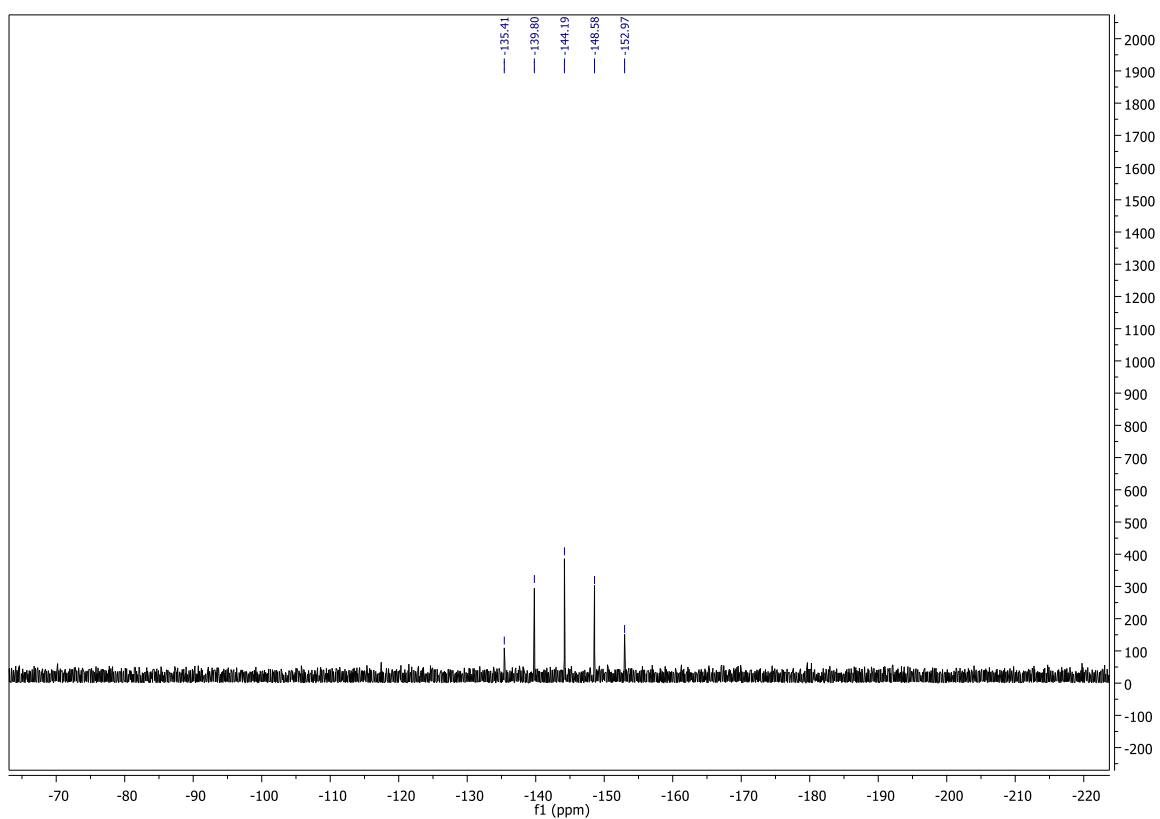

Figure S98.  $^{31}\text{P}$ NMR of Compound 23

Salsabel-SM1 #332 RT: 5.57 AV: 1 SB: 181 4.60-5.94, 4.92-6.58 NL: 1.95E5  
 T: (0,0) + c EI Full ms [40.00-1000.00]

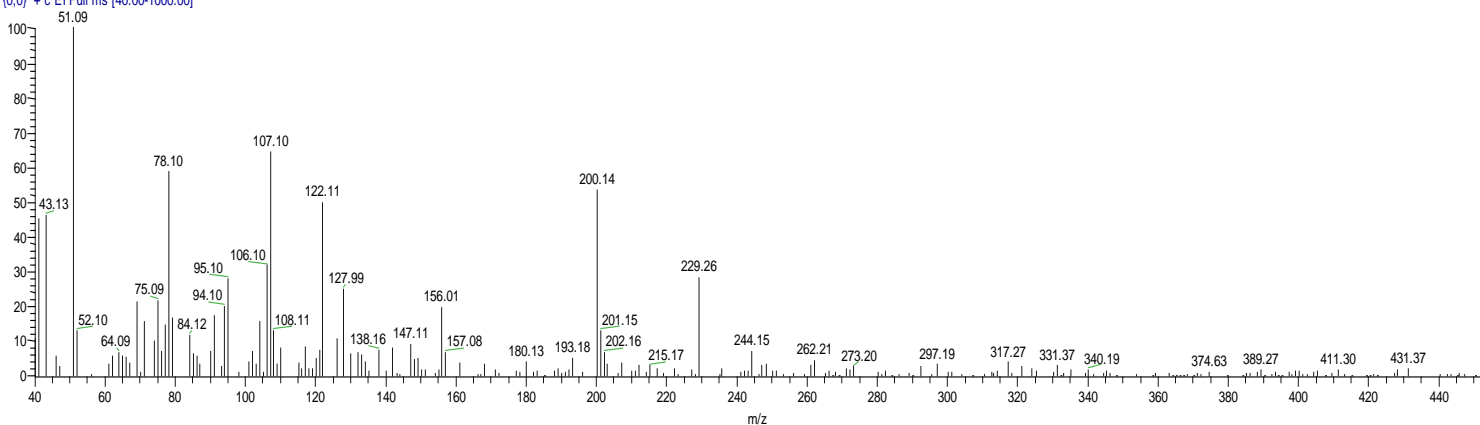

Figure S99. MS (ESI) of Compound 23

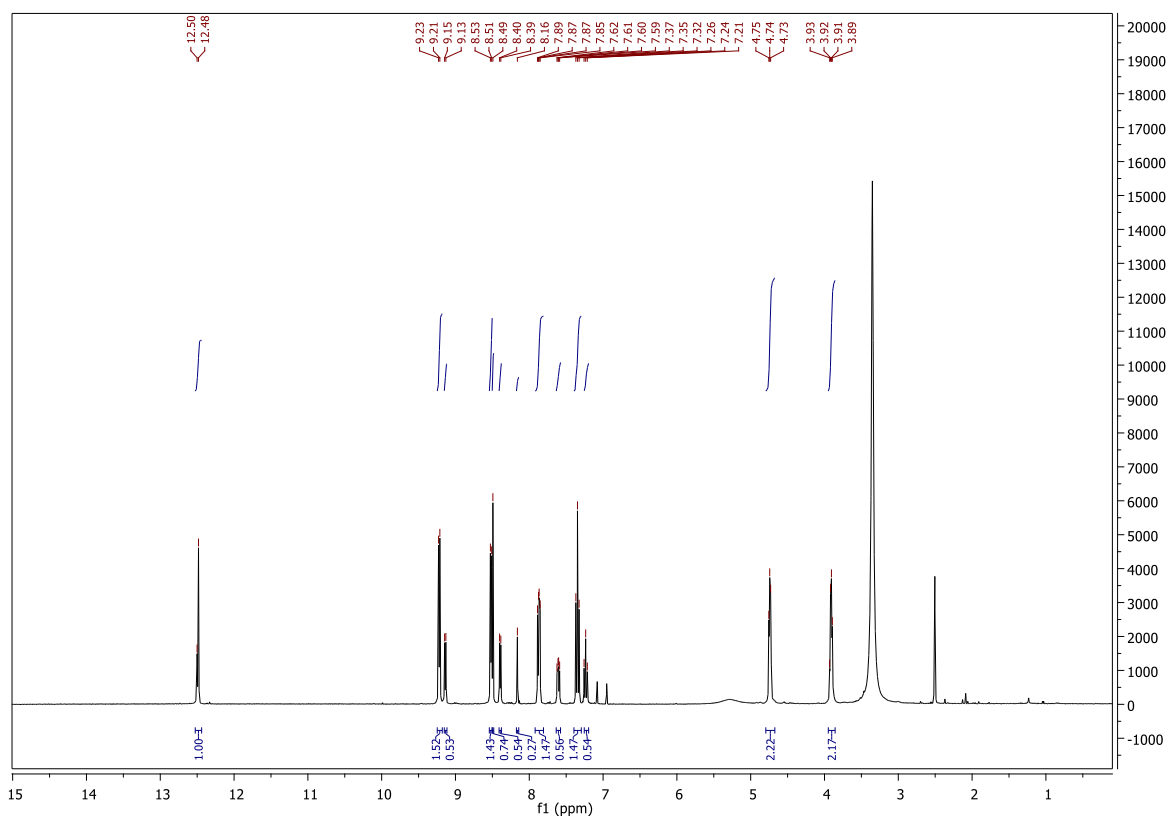

Figure S100. <sup>1</sup>H NMR of Compound 24

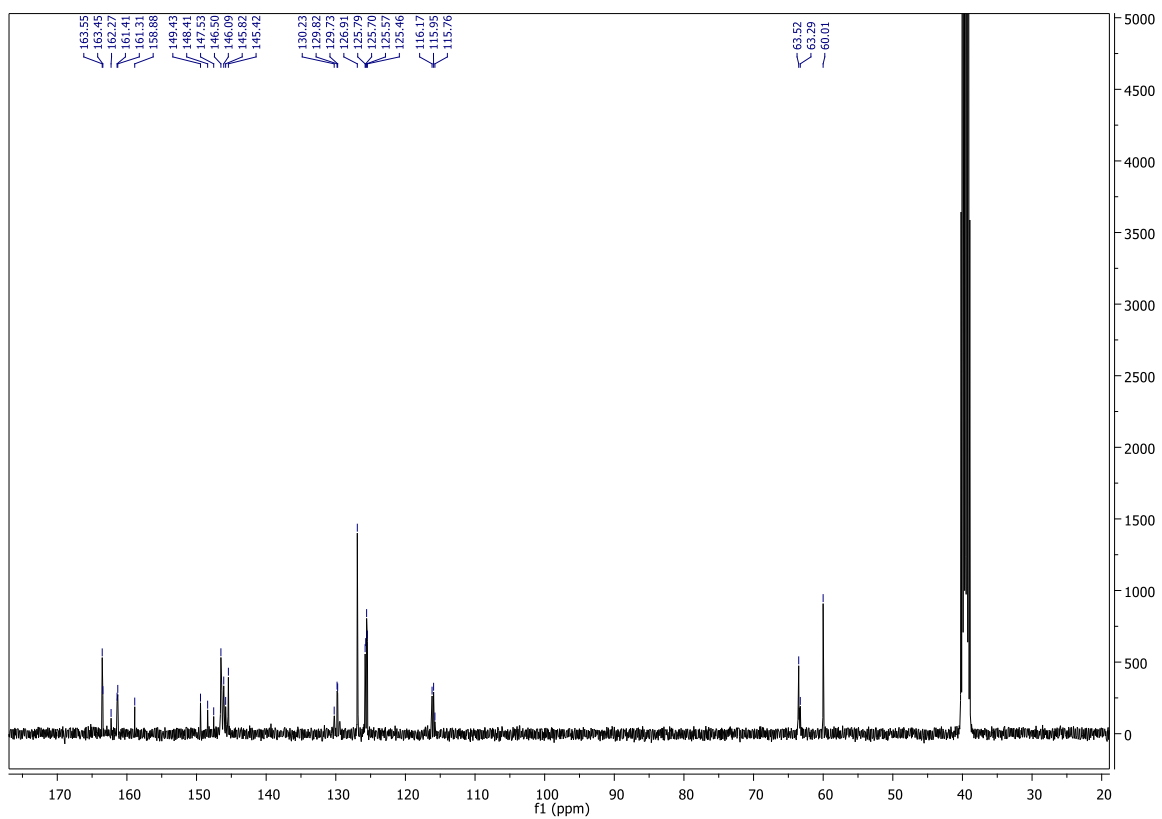

Figure S101.  $^{13}\text{C}$ NMR of Compound 24

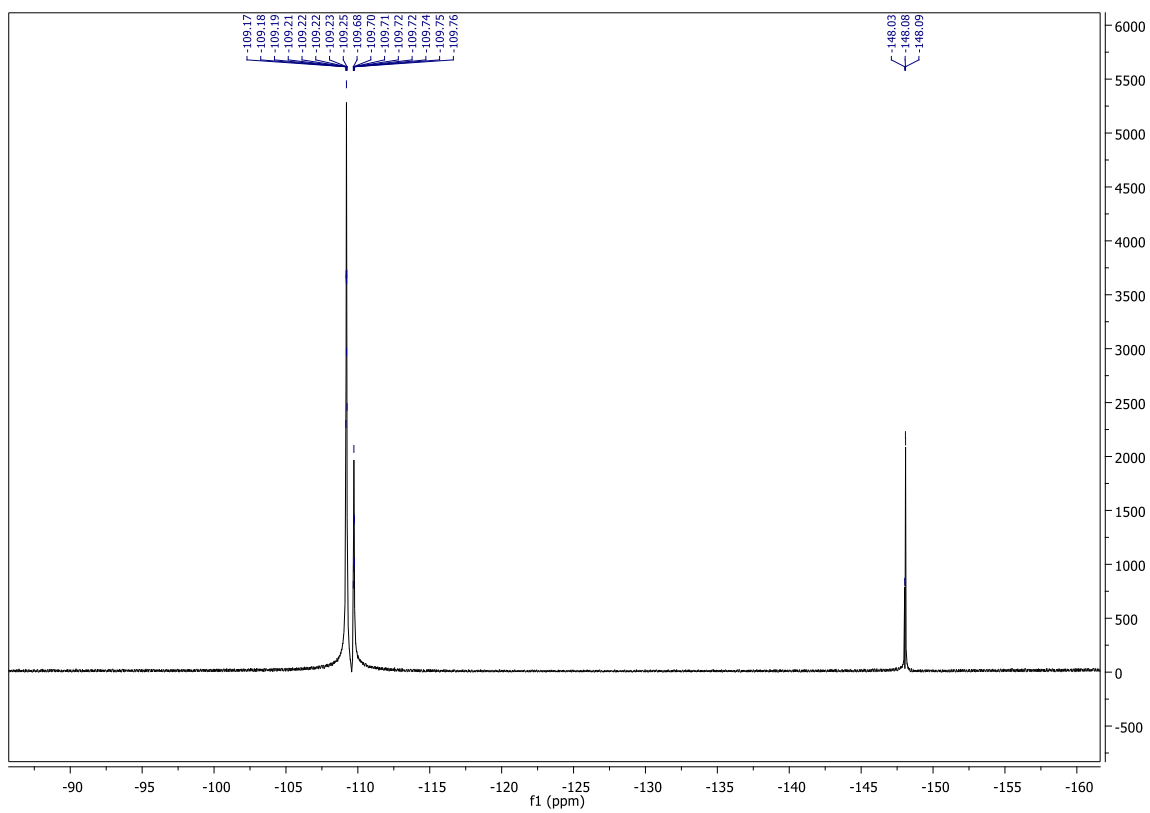

Figure S102.  $^{19}\text{F}$ NMR of Compound 24

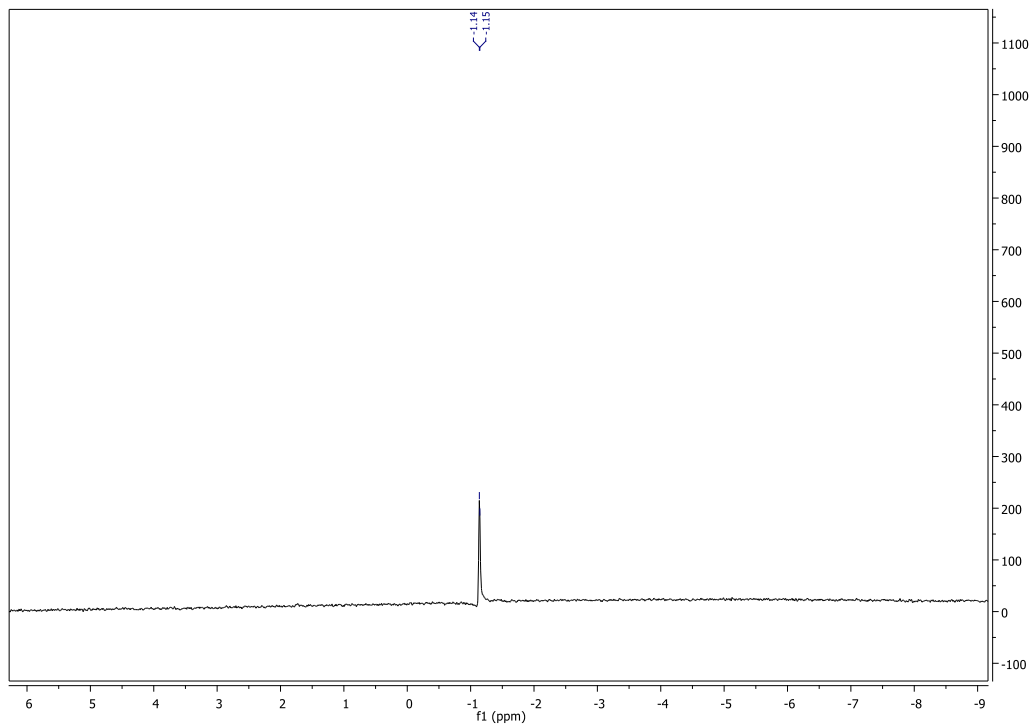

Figure S103.  $^{11}\text{B}$ NMR of Compound 24

salsabil-Sp21 #256 RT: 4.30 AV: 1 SB: 63 3.43-4.17, 3.65-3.93 NL: 1.41E6  
T: (0,0) +c EI Full ms [40.00-1000.00]

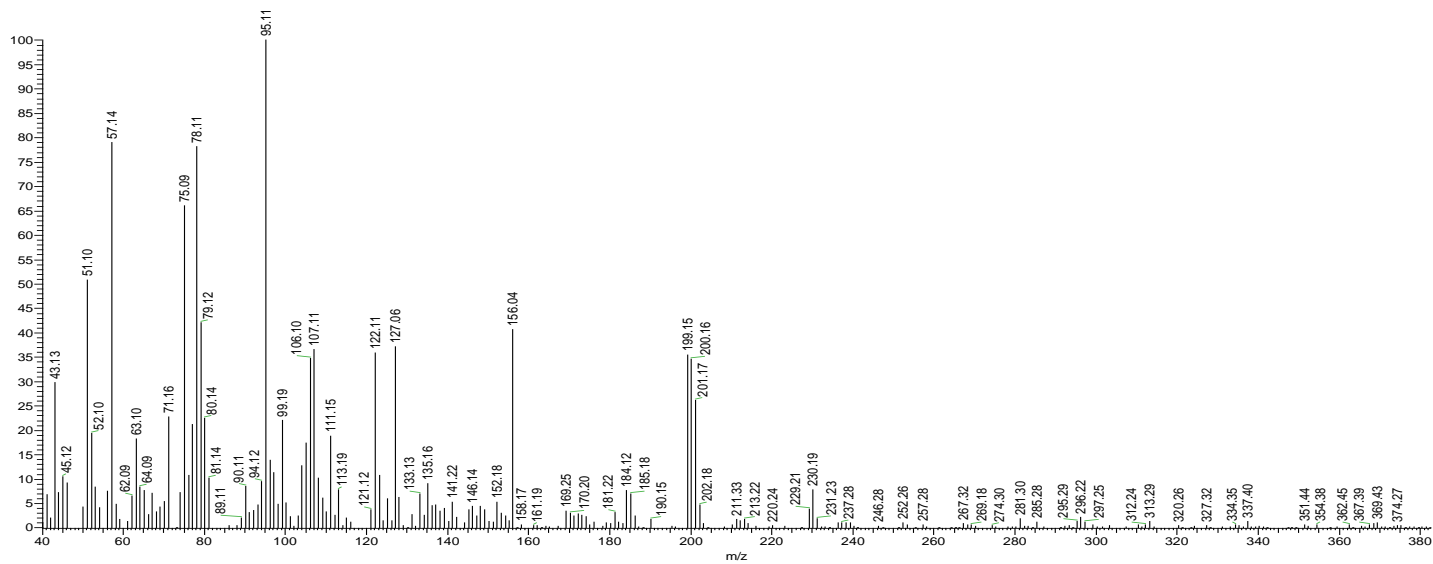

Figure S104. MS (ESI) of Compound 24

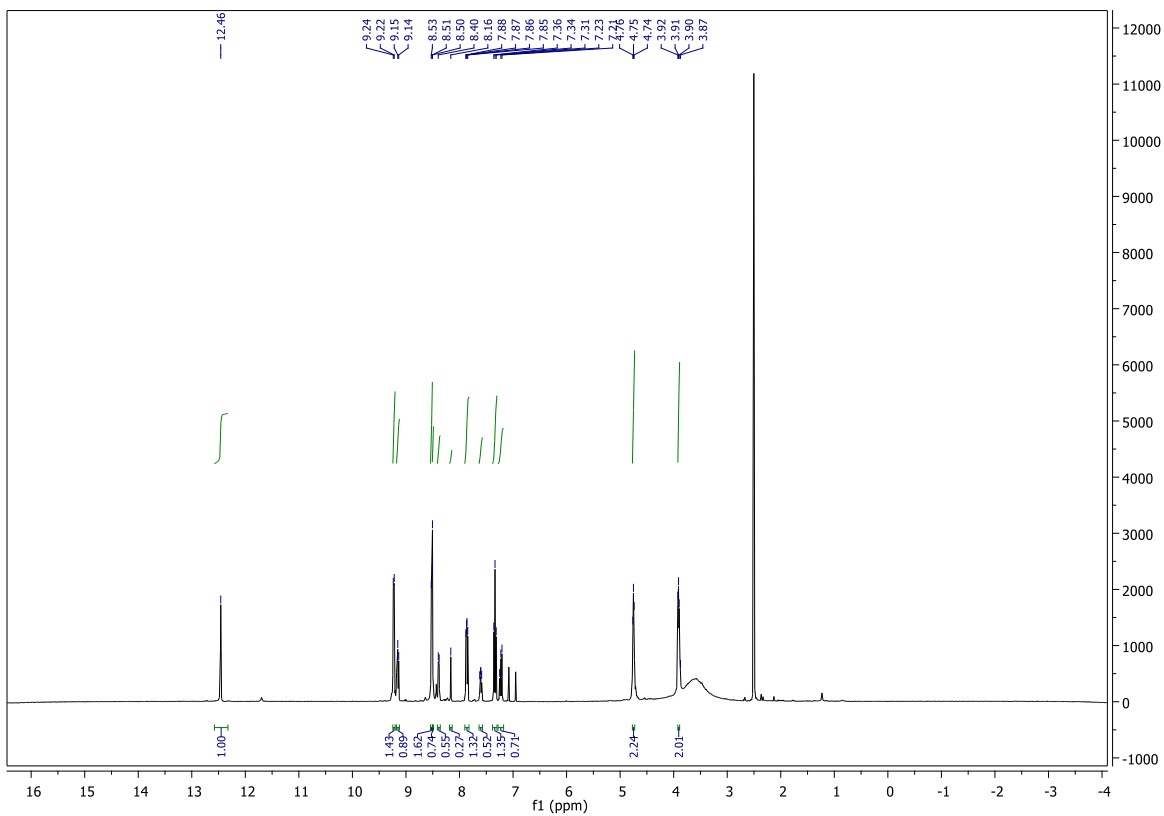

Figure S105.  $^1\text{H}$ NMR of Compound 25

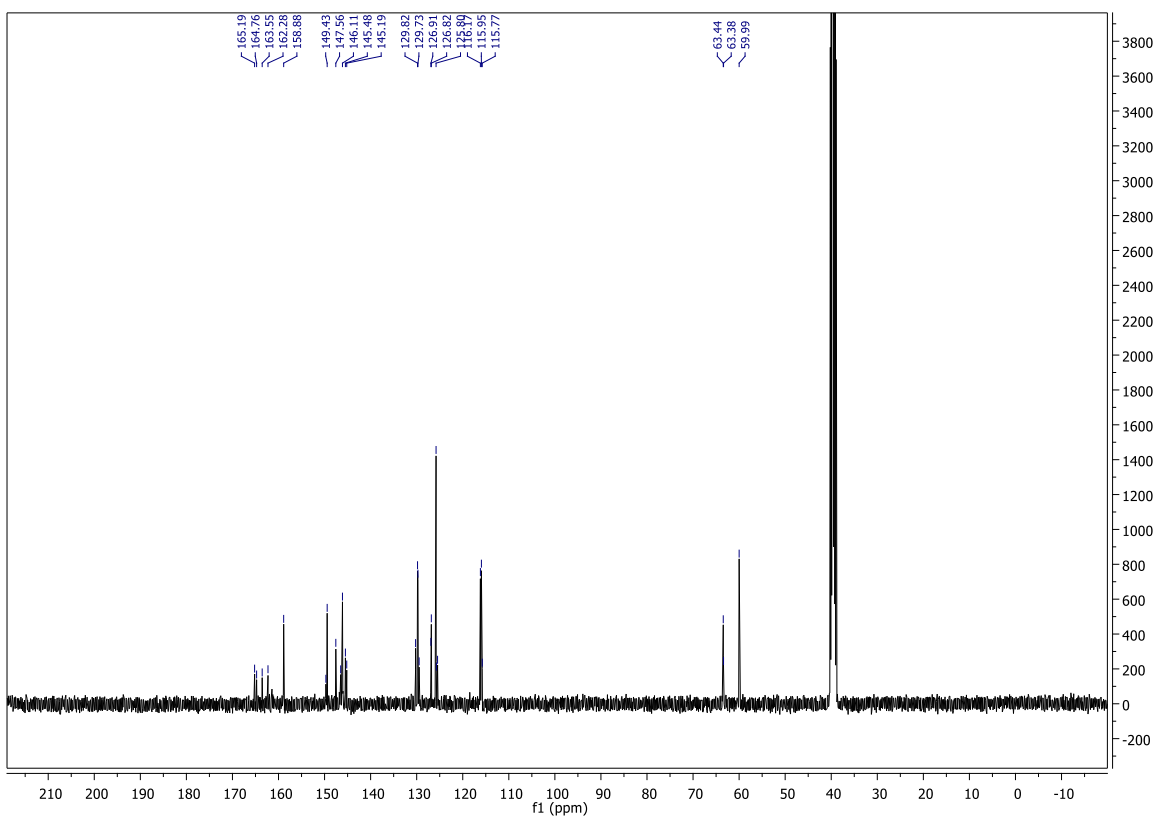

Figure S106.  $^{13}\text{C}$ NMR of Compound 25

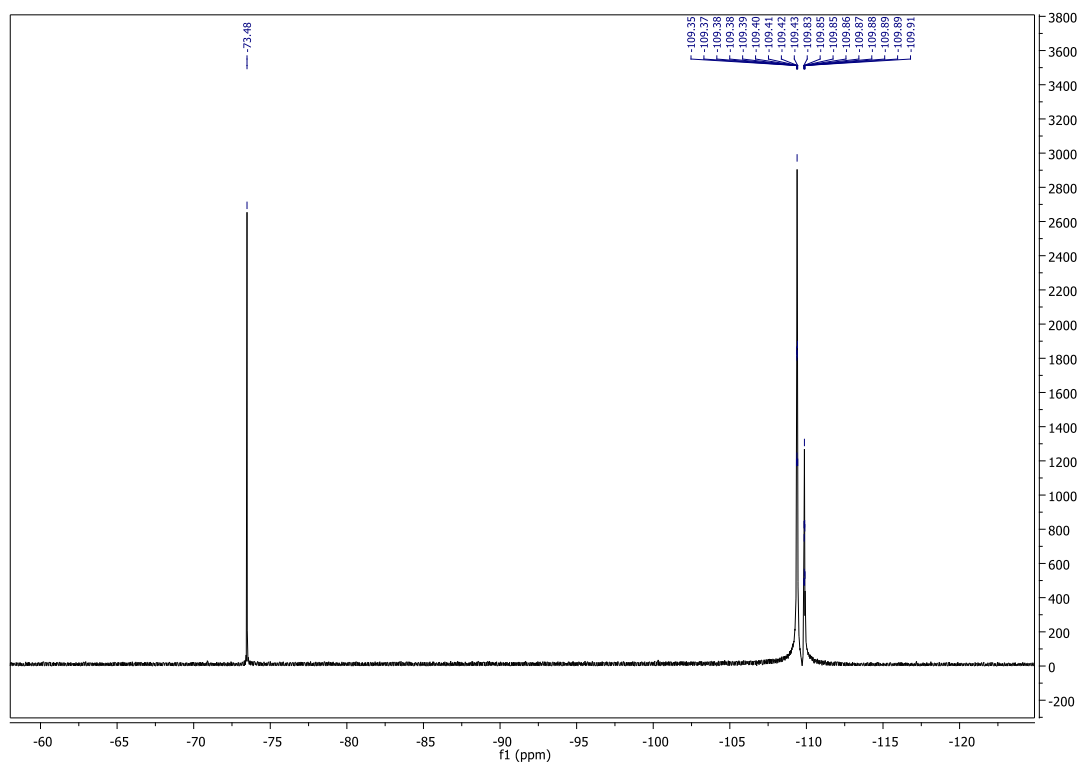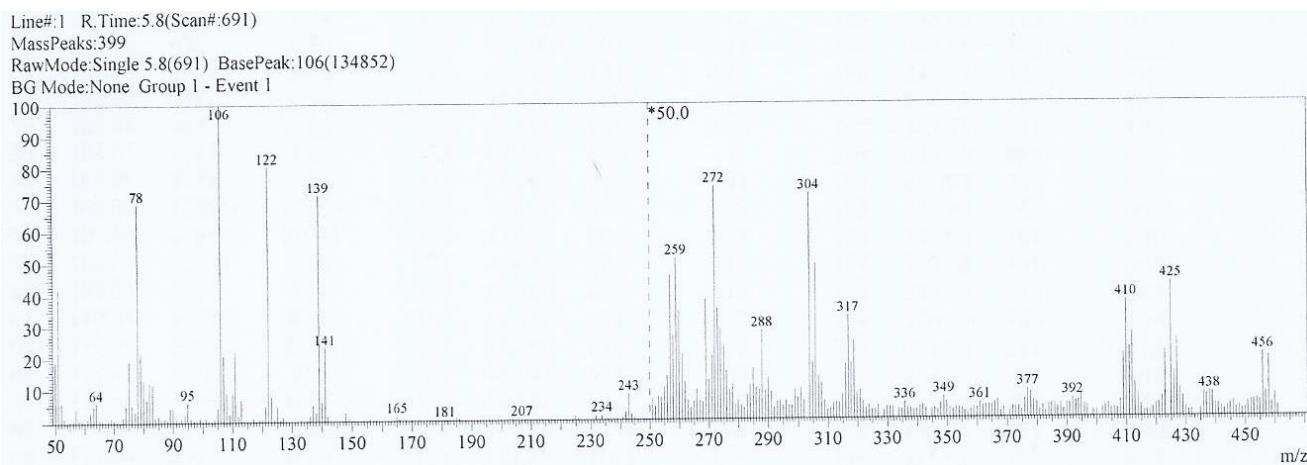

Supplement: molecules-22-01532-s001.pdf [file molecules-22-01532-s001.pdf]
